# Supplementary material for: Semaphorin7A patterns neural circuitry in the lateral line of the zebrafish
Source: eLife. 2024 Aug 12;12:RP89926. doi: 10.7554/eLife.89926 (PMC11318972; doi:10.7554/eLife.89926)
Supplement: Figure 1—source data 2. [file elife-89926-fig1-data2.xlsx]

## Sheet: Rostrad Vs Caudad
Sema7A Intensity between Rostrad and Caudad Polarized Cells
Sema7A intensities are normalized with the beta-actinGFP intensities across developmental stages.
Caudad	Sema7a/GFP																																									Avg	SEM
	36 hpf	0.0633157	0.0689453	0.186075	0.115121	0.0745289	0.124037	0.0593729	0.0494483	0.068493	0.142982	0.141998	0.143079	0.168192	0.131809	0.050667	0.0921716	0.0471003	0.0677139																							0.0997251	0.0235054
	48 hpf	0.355821	0.406892	0.358389	0.256198	0.348099	0.406307	0.185624	0.270575	0.30287	0.582654	0.485222	1.14203	0.901484	1.35147	1.12291	0.995925	0.898011	0.446162	0.582964	0.600933	0.501873	1.11082	1.54026	1.45634	0.320108	0.470613	0.314323	0.489875	1.44677	0.731932	0.673676	0.876389	0.874065	0.469372	0.831394	0.782149					0.691403	0.115234
	72 hpf	0.757566	0.900575	0.563636	0.787927	0.50358	0.655945	0.716971	0.636082	0.892488	1.3064	1.17067	1.16405	1.4067	1.32495	1.40654	1.45273	0.738504	1.01551	1.3591	0.744213	0.883685	1.36669	1.15438	0.916602	1.24433	1.03527	0.957	1.15852	0.604669	1.36888	0.734781	0.589344	0.409705	0.701029	0.709273	0.993111	0.734817	1.26089	2.00072		0.982765	0.157368
	96 hpf	1.31272	1.26575	1.51264	1.72524	1.5915	1.47271	1.71273	1.3381	1.41769	2.07744	2.08881	2.18406	2.0405	1.73441	1.76296	1.65423	1.40741	1.77232	1.57959	1.547	1.96307	2.09105	1.71529	1.87754	1.74558	2.28968	1.84174	2.34172	2.37959	2.21607	1.85662	1.62176	1.43756	1.7181	1.79363	1.71981	1.75507	1.8164	1.86055	1.53185	1.76926	0.279745
Rostrad	Sema7a/GFP																																									Avg	SEM
	36 hpf	0.0541859	0.0718539	0.199609	0.0959725	0.0859497	0.11821	0.0587723	0.061647	0.0751244	0.155225	0.129559	0.163845	0.104708	0.135931	0.0523217	0.0870508	0.0486131	0.068896																							0.098193	0.0231443
	48 hpf	0.282025	0.199782	0.285578	0.158524	0.27488	0.19947	0.351871	0.25661	0.534825	0.790105	0.502609	1.1116	0.968622	1.33207	1.14677	0.94312	1.55381	0.605842	0.524008	0.754102	1.33267	0.626155	0.946677	1.40142	0.312064	0.715144	0.653169	0.568268	0.61352	0.785293	1.0161	1.28502	0.742728	0.48255	0.817941	0.646988					0.714498	0.119083
	72 hpf	0.582583	0.576856	0.638335	0.582366	0.728525	0.962554	0.801848	0.405632	1.4323	0.713203	1.63313	0.698986	1.47846	1.02881	2.29326	1.20595	1.27582	1.45041	0.931665	1.15694	1.04389	0.768307	0.675886	0.647558	0.525902	0.585076	1.13057	0.52647	0.827594	2.1127	0.718349	0.562402	0.544702	0.609477	0.983198	0.504348	0.626872	1.38459	1.11724		0.935199	0.149752
	96 hpf	1.56219	1.58065	1.37631	1.5752	1.66887	1.7126	1.88265	1.76798	1.64171	2.1864	2.12766	2.12904	1.97184	1.36474	1.63336	1.90609	1.63538	1.60479	1.57533	1.71091	1.58876	1.859	1.82582	2.57278	1.89266	1.98638	2.19422	1.81032	2.25553	1.96805	2.04189	1.44887	1.26868	1.37908	1.48237	1.40814	1.62367	1.69722	1.96963	1.50814	1.75987	0.27826

## Sheet: Apical Vs Basal
Sema7A Intensity Distribution Along the Apicobasal Axis of the Hair Cells
2 dpf	52 HCs in total
NM 0								NM 1								NM 2								NM 3						NM 4						NM 5						NM 6
HC 1	Sema7a intensity	HC 2	Sema7a intensity	HC 3	Sema7a intensity	HC 4	Sema7a intensity	HC 1	Sema7a intensity	HC 2	Sema7a intensity	HC 3	Sema7a intensity	HC 4	Sema7a intensity	HC 1	Sema7a intensity	HC 2	Sema7a intensity	HC 3	Sema7a intensity	HC4	Sema7a intensity	HC 1	Sema7a intensity	HC 2	Sema7a intensity	HC 3	Sema7a intensity	HC 1	Sema7a intensity	HC 2	Sema7a intensity	HC 3	Sema7a intensity	HC 1	Sema7a intensity	HC 2	Sema7a intensity	HC 3	Sema7a intensity	HC 1	Sema7a intensity	HC 2	Sema7a intensity	HC 3	Sema7a intensity	HC4	Sema7a intensity
0	178.609	0	179.278	0	176.609	0	174.207	0	180.548	0	182.89	0	178.942	0	178.502	0	176.515	0	175.083	0	179.196	0	174.792	0	177.221	0	177.402	0	182.619	0	179.159	0	191.735	0	177.988	0	179.368	0	174.924	0	180.034	0	178.192	0	180.46	0	175.912	0	175.706
0.065	179.056	0.065	179.254	0.065	176.554	0.065	174.519	0.065	180.98	0.065	180.965	0.065	177.819	0.065	178.41	0.065	176.519	0.065	176.223	0.065	179.86	0.065	175.598	0.065	177.14	0.065	178.123	0.065	184.675	0.065	179.606	0.065	190.709	0.065	177.947	0.065	177.178	0.065	175.305	0.065	179.357	0.065	180.188	0.065	179.345	0.065	176.315	0.065	176.133
0.13	177.963	0.13	180.352	0.13	175.511	0.13	173.103	0.13	180.58	0.13	179.162	0.13	177.505	0.13	178.241	0.13	176.379	0.13	176.475	0.13	181.466	0.13	176.703	0.13	177.321	0.13	178.784	0.13	186.125	0.13	180.404	0.13	188.982	0.13	178.838	0.13	175.729	0.13	175.909	0.13	179.435	0.13	182.851	0.13	178.662	0.13	177.076	0.13	176.971
0.195	176.221	0.195	182.369	0.195	174.382	0.195	171.709	0.195	179.494	0.195	177.612	0.195	178.02	0.195	178.281	0.195	176.803	0.195	176.327	0.195	183.235	0.195	177.666	0.195	177.433	0.195	179.559	0.195	186.02	0.195	182.372	0.195	187.919	0.195	180.559	0.195	175.188	0.195	176.667	0.195	180.667	0.195	185	0.195	179.019	0.195	177.764	0.195	177.814
0.26	174.811	0.26	184.416	0.26	173.727	0.26	171.405	0.26	178.76	0.26	176.786	0.26	179.064	0.26	178.97	0.26	177.639	0.26	176.477	0.26	185.59	0.26	178.069	0.26	177.205	0.26	180.255	0.26	184.935	0.26	186.327	0.26	186.966	0.26	183.535	0.26	175.288	0.26	177.61	0.26	183.089	0.26	185.606	0.26	180.141	0.26	177.997	0.26	178.329
0.325	174.223	0.325	184.8	0.325	173.505	0.325	171.607	0.325	179.111	0.325	176.651	0.325	180.572	0.325	179.79	0.325	178.323	0.325	176.987	0.325	189.487	0.325	177.721	0.325	177.09	0.325	180.836	0.325	183.735	0.325	191.085	0.325	186.123	0.325	188.312	0.325	175.339	0.325	178.947	0.325	185.468	0.325	185.409	0.325	182.224	0.325	177.988	0.325	179.216
0.39	174.247	0.39	182.461	0.39	173.346	0.39	171.664	0.39	180.371	0.39	177.01	0.39	181.299	0.39	180.236	0.39	178.182	0.39	177.72	0.39	193.279	0.39	177.075	0.39	177.751	0.39	181.15	0.39	183.131	0.39	195.326	0.39	186.22	0.39	195.406	0.39	175.055	0.39	180.763	0.39	187.138	0.39	185.833	0.39	185.357	0.39	178.173	0.39	181.114
0.455	174.455	0.455	180.075	0.455	172.885	0.455	171.599	0.455	182.118	0.455	177.588	0.455	180.947	0.455	180.482	0.455	177.908	0.455	179.022	0.455	195.69	0.455	176.127	0.455	179.289	0.455	180.742	0.455	183.675	0.455	199.48	0.455	186.946	0.455	203.832	0.455	174.797	0.455	182.262	0.455	188.934	0.455	187.084	0.455	187.69	0.455	178.615	0.455	183.088
0.52	174.566	0.52	178.308	0.52	172.092	0.52	171.118	0.52	185.082	0.52	177.872	0.52	179.939	0.52	180.643	0.52	177.931	0.52	181.531	0.52	197.819	0.52	174.968	0.52	181.506	0.52	179.695	0.52	185.006	0.52	201.902	0.52	187.478	0.52	209.995	0.52	174.724	0.52	181.966	0.52	190.148	0.52	188.336	0.52	187.483	0.52	179.516	0.52	184.396
0.585	174.81	0.585	175.968	0.585	171.45	0.585	169.86	0.585	189.232	0.585	177.809	0.585	178.905	0.585	180.611	0.585	178.001	0.585	184.793	0.585	200.158	0.585	173.996	0.585	183.682	0.585	179.059	0.585	186.579	0.585	200.664	0.585	188.372	0.585	206.488	0.585	174.753	0.585	180.123	0.585	191.369	0.585	189.736	0.585	186.37	0.585	180.922	0.585	184.994
0.65	175.725	0.65	173.335	0.65	171.313	0.65	168.69	0.65	193.627	0.65	177.834	0.65	178.233	0.65	180.757	0.65	177.891	0.65	186.361	0.65	202.86	0.65	173.462	0.65	184.214	0.65	179.346	0.65	187.588	0.65	196.723	0.65	190.289	0.65	196.343	0.65	175.082	0.65	178.583	0.65	191.882	0.65	191.244	0.65	187.052	0.65	182.995	0.65	185.402
0.715	177.465	0.715	172.094	0.715	171.345	0.715	168.312	0.715	199.224	0.715	178.079	0.715	177.998	0.715	181.966	0.715	177.845	0.715	185.257	0.715	204.805	0.715	173.428	0.715	182.42	0.715	180.417	0.715	188.278	0.715	193.173	0.715	192.967	0.715	188.338	0.715	175.801	0.715	177.775	0.715	194.075	0.715	191.988	0.715	189.607	0.715	185.625	0.715	185.521
0.78	179.816	0.78	171.771	0.78	171.307	0.78	168.348	0.78	206.434	0.78	178.637	0.78	178.294	0.78	184.446	0.78	178.425	0.78	184.198	0.78	203.815	0.78	173.412	0.78	179.826	0.78	181.86	0.78	190.645	0.78	191.055	0.78	195.417	0.78	184.613	0.78	176.59	0.78	177.381	0.78	198.056	0.78	192.756	0.78	191.406	0.78	188.054	0.78	185.363
0.845	181.183	0.845	171.458	0.845	171.279	0.845	168.243	0.845	214.657	0.845	180.058	0.845	178.983	0.845	187.197	0.845	179.474	0.845	185.036	0.845	199.736	0.845	173.518	0.845	178.3	0.845	182.811	0.845	193.353	0.845	190.383	0.845	195.976	0.845	183.544	0.845	177.367	0.845	177.219	0.845	202.626	0.845	194.486	0.845	190.891	0.845	189.977	0.845	185.268
0.91	179.512	0.91	171.458	0.91	171.178	0.91	168.004	0.91	216.834	0.91	182.092	0.91	180.082	0.91	190.265	0.91	180.844	0.91	187.333	0.91	195.629	0.91	173.999	0.91	178.013	0.91	183.141	0.91	194.079	0.91	190.065	0.91	193.685	0.91	183.15	0.91	178.023	0.91	177.489	0.91	203.041	0.91	197.238	0.91	189.213	0.91	192.49	0.91	184.934
0.975	176.82	0.975	172.212	0.975	170.878	0.975	167.936	0.975	212.773	0.975	183.739	0.975	181.478	0.975	195.382	0.975	182.997	0.975	189.997	0.975	193.008	0.975	175.083	0.975	177.952	0.975	182.88	0.975	194.512	0.975	188.816	0.975	190.182	0.975	182.341	0.975	178.24	0.975	177.672	0.975	194.541	0.975	199.471	0.975	187.052	0.975	194.567	0.975	184.291
1.04	175.186	1.04	173.917	1.04	170.763	1.04	168.166	1.04	206.566	1.04	184.65	1.04	183.006	1.04	202.48	1.04	187.032	1.04	191.909	1.04	190.096	1.04	176.096	1.04	177.446	1.04	182.071	1.04	194.99	1.04	187.533	1.04	188.275	1.04	181.174	1.04	178.164	1.04	177.531	1.04	183.176	1.04	199.921	1.04	185.061	1.04	194.072	1.04	184.186
1.105	174.412	1.105	176.63	1.105	170.972	1.105	168.573	1.105	203.582	1.105	185.084	1.105	183.87	1.105	205.929	1.105	193.231	1.105	193.408	1.105	185.775	1.105	176.333	1.105	176.829	1.105	181.307	1.105	193.596	1.105	187.201	1.105	187.939	1.105	179.851	1.105	177.829	1.105	177.398	1.105	177.425	1.105	198.958	1.105	184.532	1.105	191.607	1.105	185.279
1.17	174.324	1.17	179.911	1.17	171.087	1.17	168.943	1.17	205.489	1.17	184.808	1.17	183.831	1.17	201.86	1.17	201.547	1.17	195.047	1.17	181.383	1.17	176.172	1.17	176.342	1.17	181.044	1.17	190.694	1.17	187.707	1.17	187.79	1.17	178.558	1.17	177.15	1.17	177.921	1.17	175.111	1.17	196.583	1.17	185.425	1.17	188.731	1.17	187.316
1.235	174.419	1.235	182.142	1.235	171.105	1.235	169.157	1.235	209.205	1.235	183.535	1.235	184.724	1.235	194.627	1.235	211.568	1.235	196.208	1.235	178.238	1.235	176.403	1.235	176.191	1.235	181.53	1.235	187.697	1.235	188.22	1.235	187.586	1.235	177.519	1.235	176.494	1.235	179.905	1.235	173.991	1.235	193.605	1.235	185.697	1.235	186.061	1.235	188.936
1.3	174.463	1.3	181.494	1.3	171.277	1.3	168.992	1.3	210.423	1.3	183.114	1.3	187.686	1.3	189.124	1.3	218.572	1.3	194.85	1.3	176.351	1.3	177.428	1.3	176.524	1.3	183.854	1.3	185.261	1.3	188.222	1.3	186.837	1.3	177.04	1.3	176.25	1.3	183.294	1.3	173.333	1.3	190.798	1.3	184.259	1.3	183.949	1.3	188.398
1.365	174.612	1.365	179.349	1.365	171.439	1.365	168.312	1.365	207.916	1.365	184.025	1.365	191.445	1.365	186.693	1.365	213.525	1.365	190.213	1.365	175.504	1.365	178.936	1.365	176.999	1.365	188.747	1.365	184.803	1.365	188.37	1.365	185.465	1.365	176.916	1.365	176.583	1.365	188.951	1.365	173.239	1.365	188.066	1.365	182.278	1.365	182.952	1.365	185.929
1.43	175.057	1.43	177.418	1.43	171.553	1.43	167.556	1.43	203.595	1.43	185.547	1.43	194.751	1.43	186.823	1.43	199.156	1.43	185.498	1.43	175.522	1.43	180.079	1.43	177.389	1.43	193.222	1.43	188.915	1.43	187.975	1.43	184.777	1.43	176.879	1.43	177.407	1.43	197.761	1.43	173.512	1.43	185.737	1.43	180.658	1.43	182.832	1.43	183.814
1.495	175.702	1.495	176.285	1.495	171.909	1.495	167.146	1.495	199.048	1.495	186.592	1.495	195.559	1.495	188.502	1.495	187.847	1.495	183.655	1.495	176.002	1.495	180.028	1.495	177.963	1.495	193.577	1.495	201.119	1.495	185.455	1.495	184.992	1.495	176.708	1.495	178.708	1.495	206.097	1.495	173.745	1.495	184.582	1.495	179.387	1.495	182.261	1.495	183.379
1.56	176.293	1.56	175.631	1.56	172.456	1.56	166.994	1.56	195.507	1.56	186.125	1.56	193.558	1.56	191.028	1.56	181.554	1.56	184.541	1.56	176.432	1.56	178.82	1.56	178.869	1.56	190.757	1.56	218.054	1.56	182.299	1.56	185.607	1.56	176.846	1.56	180.241	1.56	205.283	1.56	173.909	1.56	184.969	1.56	178.764	1.56	181.2	1.56	184.347
1.625	176.562	1.625	175.63	1.625	172.798	1.625	166.888	1.625	192.781	1.625	184.323	1.625	190.424	1.625	193.647	1.625	179.176	1.625	186.495	1.625	176.851	1.625	177.259	1.625	180.401	1.625	186.817	1.625	222.776	1.625	180.466	1.625	185.888	1.625	177.556	1.625	182.061	1.625	197.213	1.625	173.915	1.625	185.912	1.625	179.327	1.625	181	1.625	185.204
1.69	176.749	1.69	176.385	1.69	172.963	1.69	166.741	1.69	190.42	1.69	183.188	1.69	187.344	1.69	195.434	1.69	179.397	1.69	188.855	1.69	177.85	1.69	175.826	1.69	182.796	1.69	182.432	1.69	210.3	1.69	179.916	1.69	185.639	1.69	178.221	1.69	184.372	1.69	191.186	1.69	173.565	1.69	186.36	1.69	181.02	1.69	182.566	1.69	185.476
1.755	177.398	1.755	178.99	1.755	173.251	1.755	166.608	1.755	187.962	1.755	182.984	1.755	185.154	1.755	195.185	1.755	181.306	1.755	192.211	1.755	179.786	1.755	174.988	1.755	185.656	1.755	179.012	1.755	194.609	1.755	179.831	1.755	185.607	1.755	177.944	1.755	187.049	1.755	189.419	1.755	172.877	1.755	186.037	1.755	183.16	1.755	184.279	1.755	186.267
1.82	177.791	1.82	185.327	1.82	173.725	1.82	166.606	1.82	185.566	1.82	183.09	1.82	183.851	1.82	193.311	1.82	184.522	1.82	196.535	1.82	182.112	1.82	174.623	1.82	187.948	1.82	177.62	1.82	186.139	1.82	180.036	1.82	186.677	1.82	176.922	1.82	189.785	1.82	191.029	1.82	172.473	1.82	184.815	1.82	185.357	1.82	183.966	1.82	189.388
1.885	177.662	1.885	193.998	1.885	174.074	1.885	166.657	1.885	183.93	1.885	183.762	1.885	183.391	1.885	191.122	1.885	188.51	1.885	199.484	1.885	183.095	1.885	174.254	1.885	188.147	1.885	178	1.885	183.076	1.885	180.338	1.885	189.213	1.885	176.086	1.885	192.156	1.885	195.48	1.885	172.514	1.885	183.049	1.885	187.2	1.885	182.022	1.885	195.935
1.95	176.925	1.95	198.324	1.95	173.773	1.95	166.734	1.95	183.105	1.95	184.84	1.95	182.964	1.95	188.663	1.95	192.837	1.95	197.971	1.95	182.024	1.95	174.121	1.95	186.813	1.95	179.302	1.95	181.008	1.95	180.679	1.95	193.455	1.95	175.735	1.95	194.154	1.95	201.784	1.95	172.789	1.95	180.918	1.95	187.919	1.95	179.918	1.95	205.475
2.015	175.716	2.015	195.608	2.015	172.77	2.015	166.893	2.015	183.257	2.015	186.941	2.015	182.569	2.015	186.568	2.015	196.565	2.015	192.689	2.015	180.268	2.015	174.232	2.015	185.119	2.015	180.53	2.015	178.668	2.015	181.364	2.015	199.371	2.015	175.663	2.015	195.534	2.015	206.59	2.015	173.117	2.015	178.603	2.015	187.068	2.015	178.284	2.015	209.852
2.08	174.271	2.08	188.178	2.08	171.557	2.08	166.966	2.08	183.944	2.08	191.765	2.08	181.454	2.08	185.735	2.08	199.88	2.08	188.28	2.08	178.828	2.08	174.544	2.08	183.673	2.08	181.357	2.08	176.927	2.08	182.814	2.08	203.694	2.08	175.32	2.08	195.072	2.08	205.798	2.08	173.226	2.08	176.701	2.08	185.157	2.08	177.254	2.08	204.173
2.145	172.984	2.145	181.051	2.145	170.869	2.145	166.872	2.145	183.678	2.145	200.999	2.145	179.684	2.145	186.123	2.145	201.33	2.145	188.417	2.145	178.081	2.145	175.042	2.145	183.909	2.145	182.066	2.145	175.784	2.145	184.274	2.145	203.18	2.145	174.617	2.145	192.94	2.145	198.367	2.145	173.233	2.145	175.708	2.145	182.838	2.145	176.875	2.145	194.344
2.21	172.316	2.21	176.478	2.21	171.131	2.21	166.715	2.21	182.26	2.21	212.271	2.21	178.276	2.21	188.435	2.21	196.166	2.21	193.709	2.21	178.2	2.21	175.469	2.21	186.459	2.21	182.281	2.21	174.98	2.21	184.415	2.21	199.571	2.21	173.962	2.21	190.638	2.21	191.445	2.21	173.181	2.21	175.496	2.21	180.194	2.21	177.095	2.21	186.242
2.275	172.439	2.275	174.195	2.275	171.823	2.275	166.419	2.275	180.313	2.275	216.112	2.275	177.97	2.275	192.504	2.275	188.065	2.275	200.019	2.275	178.723	2.275	175.41	2.275	190.169	2.275	182.218	2.275	174.615	2.275	184.53	2.275	195.583	2.275	173.452	2.275	188.835	2.275	188.461	2.275	172.905	2.275	175.39	2.275	177.837	2.275	177.486	2.275	180.695
2.34	173.176	2.34	172.994	2.34	172.099	2.34	166.069	2.34	178.272	2.34	212.563	2.34	178.331	2.34	194.468	2.34	182.216	2.34	200.445	2.34	178.812	2.34	174.804	2.34	194.133	2.34	182.243	2.34	174.619	2.34	184.646	2.34	192.232	2.34	173.165	2.34	187.891	2.34	186.539	2.34	172.398	2.34	175.022	2.34	176.447	2.34	177.613	2.34	177.483
2.405	173.787	2.405	172.154	2.405	171.838	2.405	165.98	2.405	176.605	2.405	204.502	2.405	179.369	2.405	192.656	2.405	179.569	2.405	194.262	2.405	178.197	2.405	173.984	2.405	196.633	2.405	182.337	2.405	174.788	2.405	183.155	2.405	189.68	2.405	173.027	2.405	188.782	2.405	184.229	2.405	172.073	2.405	174.668	2.405	175.866	2.405	177.264	2.405	176.335
2.47	173.131	2.47	171.577	2.47	171.041	2.47	166.135	2.47	175.974	2.47	195.194	2.47	180.519	2.47	189.303	2.47	179.008	2.47	187.244	2.47	177.203	2.47	173.491	2.47	194.38	2.47	182.648	2.47	175.118	2.47	180.502	2.47	187.883	2.47	172.873	2.47	190.886	2.47	181.975	2.47	172.308	2.47	174.429	2.47	175.561	2.47	176.52	2.47	176.735
2.535	171.358	2.535	171.21	2.535	169.898	2.535	166.173	2.535	176.344	2.535	187.811	2.535	181.936	2.535	185.442	2.535	179.267	2.535	182.768	2.535	176.232	2.535	173.299	2.535	189.246	2.535	182.75	2.535	175.366	2.535	178.423	2.535	186.554	2.535	172.654	2.535	191.389	2.535	180.165	2.535	172.621	2.535	173.963	2.535	175.241	2.535	175.72	2.535	177.467
2.6	169.904	2.6	170.963	2.6	168.842	2.6	165.983	2.6	176.992	2.6	183.273	2.6	183.181	2.6	181.989	2.6	179.162	2.6	180.511	2.6	175.648	2.6	173.011	2.6	185.752	2.6	181.959	2.6	175.192	2.6	177.43	2.6	185.726	2.6	172.39	2.6	189.649	2.6	178.812	2.6	172.755	2.6	173.239	2.6	174.892	2.6	175.207	2.6	177.638
2.665	169.17	2.665	170.699	2.665	168.111	2.665	165.788	2.665	177.035	2.665	179.756	2.665	183.256	2.665	179.78	2.665	178.14	2.665	180.021	2.665	175.701	2.665	172.636	2.665	184.311	2.665	181.019	2.665	174.701	2.665	176.956	2.665	185.061	2.665	172.434	2.665	186.522	2.665	177.646	2.665	172.685	2.665	172.802	2.665	174.417	2.665	175.077	2.665	176.863
2.73	168.408	2.73	170.223	2.73	167.773	2.73	165.759	2.73	176.712	2.73	177.202	2.73	180.864	2.73	178.737	2.73	176.97	2.73	181.049	2.73	176.288	2.73	172.458	2.73	183.906	2.73	180.9	2.73	174.161	2.73	176.79	2.73	183.938	2.73	172.688	2.73	182.801	2.73	176.787	2.73	172.32	2.73	172.797	2.73	173.973	2.73	175.119	2.73	175.818
2.795	167.573	2.795	169.657	2.795	167.543	2.795	165.781	2.795	176.779	2.795	176.369	2.795	178.029	2.795	178.171	2.795	176.074	2.795	182.333	2.795	177.246	2.795	172.552	2.795	183.461	2.795	181.419	2.795	173.84	2.795	177.059	2.795	182.645	2.795	173.022	2.795	180.601	2.795	176.164	2.795	171.882	2.795	172.856	2.795	173.967	2.795	175.136	2.795	175.083
2.86	167.262	2.86	169.385	2.86	167.074	2.86	165.82	2.86	176.794	2.86	176.734	2.86	176.003	2.86	177.398	2.86	175.272	2.86	182.271	2.86	178.441	2.86	172.653	2.86	182.21	2.86	182.256	2.86	173.801	2.86	177.637	2.86	181.615	2.86	173.454	2.86	180.29	2.86	175.61	2.86	171.637	2.86	172.775	2.86	174.312	2.86	174.957	2.86	174.377
2.925	167.411	2.925	169.048	2.925	166.59	2.925	165.978	2.925	176.41	2.925	177.281	2.925	175.081	2.925	176.514	2.925	174.37	2.925	180.753	2.925	179.196	2.925	172.562	2.925	181.026	2.925	184.05	2.925	173.791	2.925	178.137	2.925	180.771	2.925	173.672	2.925	180.321	2.925	175.197	2.925	171.557	2.925	172.864	2.925	174.531	2.925	174.733	2.925	173.647
2.99	167.577	2.99	168.641	2.99	166.326	2.99	166.095	2.99	176.117	2.99	177.896	2.99	174.998	2.99	175.805	2.99	174.003	2.99	178.595	2.99	178.842	2.99	172.506	2.99	180.943	2.99	187.691	2.99	173.658	2.99	178.498	2.99	179.813	2.99	173.77	2.99	179.888	2.99	175.134	2.99	171.481	2.99	173.219	2.99	174.721	2.99	174.937	2.99	172.892
3.055	167.573	3.055	168.441	3.055	166.219	3.055	166.11	3.055	175.911	3.055	178.419	3.055	175.38	3.055	175.17	3.055	173.878	3.055	176.649	3.055	177.944	3.055	172.548	3.055	181.092	3.055	192.684	3.055	173.53	3.055	178.972	3.055	178.906	3.055	174.039	3.055	179.608	3.055	175.062	3.055	171.313	3.055	173.465	3.055	175.04	3.055	175.137	3.055	172.349
3.12	167.645	3.12	168.538	3.12	166.158	3.12	166.182	3.12	175.436	3.12	178.135	3.12	175.785	3.12	174.742	3.12	173.706	3.12	175.353	3.12	177.225	3.12	172.589	3.12	181.131	3.12	196.289	3.12	173.438	3.12	179.582	3.12	178.042	3.12	174.109	3.12	179.739	3.12	174.672	3.12	171.444	3.12	173.494	3.12	174.987	3.12	174.943	3.12	172.217
3.185	168.057	3.185	168.701	3.185	166.075	3.185	166.232	3.185	174.629	3.185	177.433	3.185	176.039	3.185	174.766	3.185	173.724	3.185	174.723	3.185	176.695	3.185	172.517	3.185	181.773	3.185	194.305	3.185	173.374	3.185	179.485	3.185	177.022	3.185	173.871	3.185	179.757	3.185	173.936	3.185	171.756	3.185	173.476	3.185	174.31	3.185	174.733	3.185	172.299
3.25	168.698	3.25	168.678	3.25	165.879	3.25	166.114	3.25	173.871	3.25	176.645	3.25	175.948	3.25	175.138	3.25	173.852	3.25	174.816	3.25	176.309	3.25	172.153	3.25	182.659	3.25	187.352	3.25	173.474	3.25	177.891	3.25	176.267	3.25	173.793	3.25	179.219	3.25	173.363	3.25	171.741	3.25	173.296	3.25	173.506	3.25	174.756	3.25	172.322
3.315	169.193	3.315	168.531	3.315	165.604	3.315	165.866	3.315	173.344	3.315	176.148	3.315	175.58	3.315	175.632	3.315	173.64	3.315	175.462	3.315	175.878	3.315	171.784	3.315	183.119	3.315	181.656	3.315	173.678	3.315	176.064	3.315	175.929	3.315	173.96	3.315	178.382	3.315	173.111	3.315	171.339	3.315	173.11	3.315	172.986	3.315	174.987	3.315	172.298
3.38	169.265	3.38	168.621	3.38	165.449	3.38	165.593	3.38	172.812	3.38	176.213	3.38	175.098	3.38	175.676	3.38	173.051	3.38	175.928	3.38	175.222	3.38	171.632	3.38	183.049	3.38	178.879	3.38	173.71	3.38	174.82	3.38	175.551	3.38	173.965	3.38	177.962	3.38	172.759	3.38	171.029	3.38	173.131	3.38	172.702	3.38	175.376	3.38	172.107
3.445	168.84	3.445	168.797	3.445	165.354	3.445	165.377	3.445	172.393	3.445	176.456	3.445	174.86	3.445	174.935	3.445	172.579	3.445	175.574	3.445	174.609	3.445	171.46	3.445	183.028	3.445	177.465	3.445	173.577	3.445	174.292	3.445	175.057	3.445	173.542	3.445	178.421	3.445	172.281	3.445	170.902	3.445	173.181	3.445	172.378	3.445	175.458	3.445	172.007
3.51	168.068	3.51	168.778	3.51	165.229	3.51	165.247	3.51	172.249	3.51	176.355	3.51	174.695	3.51	174.161	3.51	172.454	3.51	174.981	3.51	174.275	3.51	171.174	3.51	183.784	3.51	176.674	3.51	173.406	3.51	174.325	3.51	174.734	3.51	172.963	3.51	179.476	3.51	172.106	3.51	170.827	3.51	173.072	3.51	171.937	3.51	174.952	3.51	172.103
3.575	167.591	3.575	168.461	3.575	165.143	3.575	165.173	3.575	172.431	3.575	175.726	3.575	174.55	3.575	174.076	3.575	172.607	3.575	175.109	3.575	174.328	3.575	170.833	3.575	184.31	3.575	176.194	3.575	173.286	3.575	174.931	3.575	174.647	3.575	172.7	3.575	180.488	3.575	172.193	3.575	170.762	3.575	172.662	3.575	171.679	3.575	174.411	3.575	172.106
3.64	167.758	3.64	168.048	3.64	165.129	3.64	165.184	3.64	172.595	3.64	174.923	3.64	174.535	3.64	174.565	3.64	172.909	3.64	176.016	3.64	174.856	3.64	170.598	3.64	183.441	3.64	175.93	3.64	173.213	3.64	175.701	3.64	174.609	3.64	172.765	3.64	180.883	3.64	172.354	3.64	170.74	3.64	172.104	3.64	171.79	3.64	174.365	3.64	171.847
3.705	168.29	3.705	167.486	3.705	165.157	3.705	165.253	3.705	172.616	3.705	174.307	3.705	174.742	3.705	175.131	3.705	173.381	3.705	177.212	3.705	175.927	3.705	170.598	3.705	181.494	3.705	175.689	3.705	173.126	3.705	176.018	3.705	174.372	3.705	172.871	3.705	180.488	3.705	172.447	3.705	170.814	3.705	171.701	3.705	172.084	3.705	174.789	3.705	171.667
3.77	168.699	3.77	166.929	3.77	165.235	3.77	165.298	3.77	173.022	3.77	173.626	3.77	174.91	3.77	175.63	3.77	174.073	3.77	178.113	3.77	177.03	3.77	170.901	3.77	179.631	3.77	175.317	3.77	173.079	3.77	175.942	3.77	174.025	3.77	172.852	3.77	179.556	3.77	172.459	3.77	171.024	3.77	171.534	3.77	172.241	3.77	175.162	3.77	171.741
3.835	168.828	3.835	166.907	3.835	165.375	3.835	165.304	3.835	173.797	3.835	173.039	3.835	174.719	3.835	175.947	3.835	175.042	3.835	178.287	3.835	176.918	3.835	171.521	3.835	178.308	3.835	175.023	3.835	173.121	3.835	176.125	3.835	173.617	3.835	172.502	3.835	178.091	3.835	172.468	3.835	171.105	3.835	171.456	3.835	172.275	3.835	174.884	3.835	171.939
3.9	168.486	3.9	167.222	3.9	165.462	3.9	165.297	3.9	174.499	3.9	172.7	3.9	174.008	3.9	175.549	3.9	175.702	3.9	177.677	3.9	175.645	3.9	172.005	3.9	177.194	3.9	175.278	3.9	173.171	3.9	176.711	3.9	173.052	3.9	172.066	3.9	176.505	3.9	172.599	3.9	170.985	3.9	171.488	3.9	172.309	3.9	174.381	3.9	172.143
3.965	167.803	3.965	167.265	3.965	165.495	3.965	165.321	3.965	174.695	3.965	172.577	3.965	173.089	3.965	174.578	3.965	175.872	3.965	176.527	3.965	174.709	3.965	171.767	3.965	176.264	3.965	176.194	3.965	173.232	3.965	177.011	3.965	172.55	3.965	172.044	3.965	175.325	3.965	172.898	3.965	170.878	3.965	171.647	3.965	172.256	3.965	174.127	3.965	172.297
4.03	167.199	4.03	166.982	4.03	165.56	4.03	165.367	4.03	174.23	4.03	172.541	4.03	172.367	4.03	174.053	4.03	175.304	4.03	175.3	4.03	174.657	4.03	171.215	4.03	175.684	4.03	177	4.03	173.454	4.03	176.819	4.03	172.487	4.03	172.339	4.03	174.4	4.03	173.374	4.03	170.87	4.03	171.669	4.03	172.248	4.03	174.003	4.03	172.411
4.095	166.901	4.095	166.565	4.095	165.638	4.095	165.404	4.095	173.458	4.095	172.434	4.095	172.169	4.095	174.303	4.095	174.26	4.095	174.363	4.095	175.012	4.095	170.821	4.095	175.247	4.095	176.721	4.095	173.753	4.095	176.439	4.095	172.846	4.095	172.432	4.095	173.815	4.095	173.901	4.095	170.832	4.095	171.537	4.095	172.539	4.095	174.011	4.095	172.44
4.16	166.848	4.16	166.312	4.16	165.654	4.16	165.478	4.16	172.888	4.16	172.218	4.16	172.34	4.16	174.776	4.16	173.196	4.16	173.738	4.16	175.226	4.16	170.549	4.16	175.124	4.16	175.663	4.16	173.835	4.16	175.879	4.16	173.08	4.16	172.259	4.16	173.703	4.16	174.312	4.16	170.671	4.16	171.553	4.16	172.866	4.16	173.811	4.16	172.33
4.225	166.804	4.225	166.177	4.225	165.598	4.225	165.517	4.225	172.79	4.225	172.109	4.225	172.745	4.225	174.88	4.225	172.502	4.225	173.373	4.225	175.294	4.225	170.468	4.225	175.279	4.225	174.821	4.225	173.82	4.225	175.32	4.225	172.937	4.225	172.233	4.225	173.706	4.225	174.429	4.225	170.537	4.225	171.713	4.225	172.859	4.225	173.192	4.225	172.096
4.29	166.524	4.29	166.024	4.29	165.54	4.29	165.397	4.29	173.092	4.29	172.231	4.29	173.049	4.29	174.7	4.29	172.032	4.29	173.316	4.29	175.567	4.29	170.899	4.29	175.41	4.29	174.523	4.29	173.918	4.29	175.159	4.29	172.844	4.29	172.446	4.29	173.405	4.29	174.091	4.29	170.45	4.29	171.83	4.29	172.632	4.29	172.774	4.29	171.725
4.355	166.09	4.355	165.887	4.355	165.448	4.355	165.203	4.355	173.223	4.355	172.328	4.355	173.052	4.355	174.411	4.355	171.888	4.355	173.494	4.355	175.768	4.355	171.662	4.355	175.787	4.355	174.636	4.355	173.918	4.355	175.281	4.355	173.096	4.355	172.858	4.355	173.012	4.355	173.566	4.355	170.329	4.355	171.891	4.355	172.322	4.355	172.669	4.355	171.432
4.42	165.767	4.42	165.794	4.42	165.176	4.42	165.042	4.42	172.857	4.42	172.25	4.42	172.825	4.42	174.006	4.42	172.088	4.42	173.837	4.42	175.546	4.42	172.098	4.42	176.386	4.42	175.128	4.42	173.585	4.42	175.326	4.42	173.282	4.42	173.196	4.42	172.949	4.42	173.051	4.42	170.054	4.42	172.007	4.42	171.85	4.42	172.742	4.42	171.315
4.485	165.664	4.485	165.72	4.485	164.809	4.485	164.917	4.485	172.464	4.485	172.094	4.485	172.51	4.485	173.438	4.485	172.465	4.485	174.339	4.485	175.503	4.485	171.945	4.485	176.435	4.485	175.534	4.485	173.219	4.485	175.263	4.485	172.991	4.485	173.27	4.485	173.141	4.485	172.762	4.485	169.807	4.485	172.158	4.485	171.396	4.485	172.997	4.485	171.31
4.55	165.66	4.55	165.758	4.55	164.57	4.55	164.827	4.55	172.302	4.55	171.952	4.55	172.215	4.55	172.972	4.55	172.959	4.55	174.613	4.55	176.063	4.55	171.587	4.55	175.673	4.55	175.375	4.55	173.147	4.55	175.356	4.55	172.526	4.55	173.068	4.55	173.335	4.55	172.7	4.55	169.711	4.55	172.25	4.55	171.203	4.55	172.935	4.55	171.22
4.615	165.702	4.615	166.072	4.615	164.448	4.615	164.786	4.615	172.264	4.615	171.966	4.615	172.134	4.615	172.908	4.615	173.439	4.615	174.271	4.615	176.266	4.615	171.163	4.615	174.904	4.615	175.029	4.615	173.232	4.615	175.841	4.615	172.164	4.615	172.924	4.615	173.428	4.615	172.467	4.615	169.677	4.615	172.286	4.615	171.343	4.615	172.3	4.615	171.083
4.68	165.792	4.68	166.554	4.68	164.351	4.68	164.846	4.68	172.476	4.68	172.053	4.68	172.142	4.68	172.894	4.68	173.413	4.68	173.511	4.68	175.551	4.68	170.676	4.68	174.714	4.68	174.833	4.68	173.401	4.68	176.599	4.68	171.915	4.68	172.902	4.68	173.382	4.68	172.051	4.68	169.623	4.68	172.291	4.68	171.7	4.68	172.024	4.68	171.116
4.745	165.993	4.745	166.747	4.745	164.197	4.745	165.022	4.745	172.942	4.745	172.008	4.745	172.275	4.745	172.458	4.745	172.741	4.745	172.606	4.745	174.653	4.745	170.363	4.745	174.964	4.745	174.753	4.745	173.627	4.745	177.494	4.745	171.753	4.745	172.861	4.745	173.264	4.745	171.793	4.745	169.595	4.745	172.236	4.745	172.103	4.745	172.356	4.745	171.447
4.81	166.324	4.81	166.44	4.81	164.031	4.81	165.175	4.81	173.4	4.81	171.751	4.81	172.353	4.81	171.778	4.81	172.238	4.81	171.852	4.81	174.019	4.81	170.186	4.81	175.298	4.81	174.789	4.81	173.703	4.81	178.469	4.81	171.666	4.81	172.702	4.81	173.167	4.81	171.833	4.81	169.571	4.81	172.118	4.81	172.37	4.81	172.809	4.81	172.164
4.875	166.39	4.875	166.031	4.875	164.04	4.875	165.142	4.875	173.81	4.875	171.508	4.875	172.176	4.875	171.248	4.875	172.252	4.875	171.521	4.875	173.686	4.875	169.831	4.875	175.484	4.875	174.981	4.875	173.58	4.875	179.209	4.875	171.659	4.875	172.483	4.875	173.271	4.875	171.867	4.875	169.448	4.875	171.984	4.875	172.44	4.875	173.021	4.875	173.23
4.94	166.065	4.94	165.886	4.94	164.194	4.94	164.908	4.94	174.083	4.94	171.331	4.94	171.917	4.94	170.979	4.94	172.63	4.94	171.513	4.94	173.735	4.94	169.473	4.94	175.623	4.94	175.107	4.94	173.428	4.94	179.583	4.94	171.705	4.94	172.543	4.94	173.736	4.94	171.819	4.94	169.345	4.94	171.801	4.94	172.436	4.94	173.183	4.94	174.144
5.005	165.782	5.005	165.966	5.005	164.277	5.005	164.754	5.005	174.321	5.005	171.276	5.005	172.003	5.005	170.937	5.005	173.349	5.005	171.488	5.005	174.109	5.005	169.324	5.005	175.733	5.005	174.883	5.005	173.436	5.005	179.458	5.005	171.783	5.005	172.986	5.005	174.332	5.005	171.944	5.005	169.433	5.005	171.53	5.005	172.502	5.005	173.594	5.005	174.41
5.07	165.842	5.07	165.983	5.07	164.225	5.07	164.78	5.07	174.573	5.07	171.494	5.07	172.74	5.07	170.929	5.07	174.544	5.07	171.373	5.07	174.475	5.07	169.288	5.07	175.661	5.07	174.406	5.07	173.541	5.07	178.782	5.07	171.973	5.07	173.425	5.07	174.792	5.07	172.411	5.07	169.622	5.07	171.195	5.07	172.896	5.07	173.986	5.07	174.015
5.135	166.08	5.135	165.826	5.135	164.183	5.135	164.859	5.135	174.645	5.135	171.776	5.135	173.978	5.135	170.864	5.135	176.024	5.135	171.314	5.135	174.516	5.135	169.363	5.135	175.357	5.135	174.078	5.135	173.518	5.135	177.942	5.135	172.271	5.135	173.515	5.135	175.155	5.135	172.963	5.135	169.839	5.135	170.916	5.135	173.77	5.135	174.22	5.135	173.428
5.2	165.979	5.2	165.52	5.2	164.25	5.2	164.952	5.2	174.341	5.2	172.075	5.2	175.003	5.2	171.059	5.2	177.184	5.2	171.387	5.2	174.413	5.2	169.594	5.2	175.35	5.2	174.178	5.2	173.456	5.2	177.693	5.2	172.344	5.2	173.512	5.2	175.697	5.2	173.127	5.2	170.149	5.2	170.765	5.2	174.762	5.2	174.416	5.2	172.641
5.265	165.605	5.265	165.266	5.265	164.438	5.265	164.967	5.265	173.597	5.265	172.261	5.265	175.341	5.265	171.646	5.265	177.194	5.265	171.535	5.265	174.351	5.265	169.927	5.265	175.899	5.265	174.552	5.265	173.506	5.265	177.573	5.265	172.156	5.265	173.408	5.265	176.343	5.265	172.836	5.265	170.676	5.265	170.792	5.265	175.114	5.265	174.509	5.265	171.853
5.33	165.355	5.33	165.27	5.33	164.772	5.33	164.788	5.33	172.984	5.33	172.081	5.33	175.079	5.33	172.388	5.33	176.212	5.33	171.712	5.33	174.28	5.33	170.223	5.33	176.154	5.33	174.805	5.33	173.51	5.33	177.054	5.33	172.089	5.33	173.308	5.33	176.297	5.33	172.547	5.33	171.205	5.33	171.06	5.33	174.567	5.33	174.303	5.33	171.48
5.395	165.173	5.395	165.377	5.395	165.177	5.395	164.56	5.395	172.743	5.395	171.68	5.395	174.808	5.395	173.132	5.395	175.145	5.395	171.756	5.395	174.35	5.395	170.51	5.395	175.998	5.395	174.851	5.395	173.291	5.395	176.488	5.395	172.178	5.395	173.029	5.395	175.353	5.395	172.475	5.395	171.314	5.395	171.33	5.395	173.754	5.395	173.805	5.395	171.506
5.46	164.947	5.46	165.34	5.46	165.412	5.46	164.338	5.46	172.709	5.46	171.408	5.46	174.578	5.46	173.915	5.46	174.425	5.46	171.542	5.46	174.616	5.46	170.864	5.46	176.127	5.46	174.895	5.46	173.105	5.46	176.321	5.46	172.38	5.46	172.856	5.46	174.412	5.46	172.566	5.46	170.999	5.46	171.359	5.46	173.332	5.46	173.557	5.46	171.674
5.525	164.744	5.525	165.247	5.525	165.329	5.525	163.986	5.525	172.501	5.525	171.385	5.525	174.13	5.525	174.47	5.525	174.103	5.525	171.282	5.525	174.681	5.525	171.275	5.525	176.493	5.525	175.132	5.525	173.244	5.525	176.515	5.525	172.662	5.525	173.057	5.525	173.892	5.525	172.55	5.525	170.505	5.525	171.318	5.525	173.394	5.525	173.636	5.525	171.784
5.59	164.705	5.59	165.32	5.59	165.124	5.59	163.559	5.59	172.146	5.59	171.438	5.59	173.49	5.59	174.577	5.59	174.205	5.59	171.182	5.59	174.449	5.59	171.469	5.59	176.815	5.59	175.635	5.59	173.513	5.59	176.878	5.59	172.849	5.59	173.671	5.59	173.555	5.59	172.466	5.59	170.229	5.59	171.37	5.59	173.643	5.59	173.781	5.59	171.972
5.655	164.831	5.655	165.558	5.655	165.062	5.655	163.309	5.655	172.074	5.655	171.324	5.655	172.654	5.655	174.49	5.655	174.773	5.655	171.353	5.655	174.406	5.655	171.001	5.655	177.278	5.655	176.029	5.655	173.693	5.655	176.981	5.655	173.108	5.655	174.197	5.655	173.191	5.655	172.528	5.655	170.277	5.655	171.472	5.655	173.685	5.655	173.887	5.655	172.283
5.72	164.937	5.72	165.87	5.72	165.127	5.72	163.36	5.72	172.347	5.72	171.096	5.72	172.077	5.72	174.158	5.72	175.175	5.72	171.754	5.72	174.629	5.72	170.145	5.72	177.642	5.72	175.573	5.72	173.822	5.72	176.668	5.72	173.388	5.72	174.289	5.72	172.834	5.72	172.599	5.72	170.498	5.72	171.633	5.72	173.516	5.72	174.054	5.72	172.542
5.785	165.013	5.785	166.21	5.785	165.128	5.785	163.618	5.785	172.72	5.785	171.026	5.785	171.771	5.785	173.519	5.785	174.883	5.785	172.077	5.785	174.775	5.785	169.533	5.785	177.461	5.785	174.346	5.785	173.779	5.785	176.376	5.785	173.292	5.785	174.008	5.785	172.643	5.785	172.684	5.785	170.769	5.785	171.952	5.785	173.244	5.785	174.218	5.785	172.65
5.85	165.077	5.85	166.455	5.85	164.955	5.85	163.877	5.85	172.943	5.85	171.146	5.85	171.474	5.85	173.003	5.85	174.035	5.85	172.104	5.85	174.906	5.85	169.362	5.85	177.161	5.85	173.312	5.85	173.59	5.85	176.427	5.85	173.019	5.85	173.61	5.85	172.583	5.85	172.805	5.85	171.185	5.85	172.356	5.85	172.737	5.85	174.021	5.85	172.469
5.915	165.037	5.915	166.662	5.915	164.655	5.915	164.074	5.915	172.851	5.915	171.21	5.915	171.181	5.915	172.834	5.915	173.239	5.915	172.022	5.915	175.119	5.915	169.405	5.915	176.971	5.915	173.015	5.915	173.416	5.915	176.909	5.915	172.919	5.915	173.306	5.915	172.504	5.915	172.84	5.915	171.792	5.915	172.664	5.915	172.27	5.915	173.547	5.915	172.073
5.98	165.011	5.98	166.917	5.98	164.404	5.98	164.274	5.98	172.7	5.98	171.062	5.98	171.138	5.98	172.816	5.98	172.682	5.98	171.999	5.98	175.03	5.98	169.531	5.98	176.847	5.98	173.197	5.98	173.228	5.98	177.349	5.98	172.744	5.98	173.013	5.98	172.548	5.98	173.248	5.98	172.455	5.98	172.545	5.98	172.37	5.98	173.037	5.98	172.05
6.045	165.046	6.045	166.982	6.045	164.344	6.045	164.386	6.045	172.649	6.045	170.869	6.045	171.441	6.045	172.65	6.045	172.308	6.045	171.908	6.045	174.423	6.045	169.772	6.045	177.086	6.045	173.391	6.045	173.113	6.045	177.594	6.045	172.381	6.045	172.493	6.045	172.793	6.045	174.217	6.045	172.762	6.045	172.014	6.045	173.02	6.045	172.74	6.045	172.169
6.11	165.105	6.11	166.844	6.11	164.464	6.11	164.337	6.11	172.775	6.11	170.772	6.11	171.958	6.11	172.28	6.11	172.117	6.11	171.775	6.11	173.603	6.11	170.098	6.11	177.365	6.11	173.566	6.11	173.201	6.11	177.671	6.11	171.985	6.11	172.122	6.11	172.9	6.11	175.442	6.11	171.911	6.11	171.649	6.11	173.518	6.11	172.924	6.11	172.075
6.175	165.274	6.175	166.622	6.175	164.677	6.175	164.311	6.175	173.239	6.175	170.734	6.175	172.566	6.175	172.007	6.175	172.143	6.175	171.731	6.175	172.989	6.175	170.144	6.175	177.181	6.175	173.916	6.175	173.372	6.175	177.656	6.175	171.567	6.175	172.084	6.175	172.618	6.175	176.415	6.175	170.826	6.175	171.6	6.175	173.545	6.175	173.499	6.175	171.987
6.24	165.481	6.24	166.359	6.24	164.921	6.24	164.394	6.24	174.01	6.24	170.857	6.24	173.07	6.24	171.835	6.24	172.153	6.24	171.732	6.24	172.762	6.24	169.817	6.24	176.533	6.24	174.144	6.24	173.573	6.24	177.278	6.24	171.32	6.24	172.242	6.24	172.186	6.24	177.033	6.24	170.227	6.24	171.631	6.24	173.49	6.24	173.963	6.24	171.942
6.305	165.492	6.305	166.101	6.305	165.1	6.305	164.465	6.305	174.803	6.305	171.018	6.305	173.315	6.305	171.685	6.305	171.982	6.305	171.723	6.305	172.744	6.305	169.427	6.305	175.895	6.305	173.868	6.305	173.9	6.305	176.431	6.305	171.221	6.305	172.409	6.305	171.889	6.305	177.245	6.305	170.103	6.305	171.834	6.305	173.321	6.305	174.051	6.305	171.71
6.37	165.299	6.37	165.954	6.37	165.137	6.37	164.516	6.37	175.054	6.37	171.066	6.37	173.281	6.37	171.873	6.37	171.794	6.37	171.743	6.37	172.649	6.37	169.105	6.37	175.417	6.37	173.29	6.37	174.477	6.37	175.634	6.37	171.261	6.37	172.583	6.37	171.8	6.37	176.361	6.37	170.124	6.37	172.167	6.37	172.985	6.37	173.952	6.37	171.381
6.435	164.989	6.435	165.844	6.435	165.022	6.435	164.749	6.435	174.48	6.435	171.169	6.435	173.228	6.435	172.317	6.435	171.541	6.435	171.733	6.435	172.447	6.435	168.994	6.435	175.292	6.435	172.715	6.435	175.329	6.435	175.312	6.435	171.622	6.435	172.788	6.435	171.999	6.435	174.761	6.435	170.146	6.435	172.325	6.435	173.004	6.435	173.962	6.435	171.22
6.5	164.781	6.5	165.725	6.5	164.907	6.5	165.195	6.5	173.435	6.5	171.291	6.5	173.25	6.5	172.689	6.5	171.245	6.5	171.598	6.5	172.223	6.5	169.184	6.5	175.606	6.5	172.224	6.5	175.943	6.5	175.386	6.5	172.374	6.5	173.072	6.5	172.611	6.5	173.345	6.5	170.244	6.5	172.425	6.5	173.736	6.5	174.003	6.5	171.124
6.565	164.732	6.565	165.661	6.565	164.928	6.565	165.59	6.565	172.426	6.565	171.297	6.565	173.196	6.565	173.019	6.565	171.052	6.565	171.519	6.565	172.085	6.565	169.576	6.565	175.947	6.565	171.959	6.565	175.894	6.565	176.023	6.565	173.395			6.565	173.562	6.565	172.399	6.565	170.421	6.565	172.666	6.565	174.443	6.565	173.71	6.565	171.109
6.63	164.801	6.63	165.554	6.63	165.052	6.63	165.735	6.63	171.828	6.63	171.375	6.63	172.885	6.63	173.365	6.63	171.099	6.63	171.808	6.63	172.211	6.63	169.967	6.63	176.22	6.63	172.051	6.63	175.639	6.63	177.476	6.63	174.327			6.63	174.276	6.63	171.758	6.63	170.435	6.63	172.987	6.63	174.068	6.63	173.457	6.63	171.196
6.695	164.928	6.695	165.501	6.695	165.278	6.695	165.755	6.695	171.629	6.695	171.546	6.695	172.666	6.695	173.515	6.695	171.122	6.695	172.315	6.695	172.738	6.695	170.28	6.695	176.237	6.695	172.572	6.695	175.544	6.695	178.667	6.695	174.83			6.695	174.025	6.695	171.514	6.695	170.31	6.695	173.45	6.695	173.115	6.695	173.457	6.695	171.302
6.76	164.897	6.76	165.605	6.76	165.664	6.76	165.835	6.76	171.672	6.76	171.736	6.76	172.652	6.76	173.712	6.76	171.058	6.76	172.61	6.76	173.561	6.76	170.439	6.76	175.664	6.76	173.214	6.76	175.374	6.76	178.39	6.76	174.729			6.76	173.079	6.76	171.5	6.76	170.254	6.76	174.146	6.76	172.645	6.76	173.56	6.76	171.243
6.825	164.814	6.825	165.704	6.825	165.996	6.825	165.957	6.825	171.874	6.825	171.567	6.825	172.832	6.825	174.467	6.825	171.166	6.825	172.614	6.825	174.342	6.825	170.391	6.825	174.904	6.825	173.245	6.825	175.235			6.825	174.084			6.825	172.111	6.825	171.596	6.825	170.296	6.825	174.976	6.825	172.832	6.825	173.608	6.825	170.961
6.89	164.729	6.89	165.655	6.89	165.936	6.89	165.979	6.89	172.412	6.89	171.042	6.89	173.024	6.89	175.471	6.89	171.728	6.89	172.534	6.89	174.997	6.89	170.068	6.89	174.273	6.89	172.738	6.89	175.929			6.89	173.108			6.89	171.457	6.89	171.719	6.89	170.354	6.89	175.664	6.89	173.286	6.89	173.453	6.89	170.68
6.955	164.584	6.955	165.481	6.955	165.649	6.955	166.005	6.955	173.236	6.955	170.633	6.955	173.042	6.955	175.77	6.955	172.287	6.955	172.524	6.955	175.58	6.955	169.673	6.955	174.051	6.955	172.517	6.955	178.159			6.955	172.137			6.955	171.305	6.955	171.833	6.955	170.388	6.955	175.981	6.955	173.581	6.955	173.313	6.955	170.572
7.02	164.42	7.02	165.332	7.02	165.403	7.02	166.14	7.02	173.763	7.02	170.525	7.02	172.942	7.02	174.952	7.02	172.364	7.02	172.621	7.02	176.064	7.02	169.38	7.02	174.273	7.02	172.702	7.02	182.911			7.02	171.641			7.02	171.528	7.02	172.136	7.02	170.315	7.02	175.937	7.02	173.815	7.02	173.388	7.02	170.529
7.085	164.273	7.085	165.325	7.085	165.202	7.085	166.123	7.085	173.684	7.085	170.738	7.085	172.962	7.085	173.905	7.085	172.178	7.085	172.678	7.085	176.801	7.085	169.369	7.085	174.527	7.085	173.113	7.085	191.998			7.085	171.719			7.085	171.741	7.085	172.616	7.085	170.134	7.085	175.624	7.085	174.284	7.085	173.535	7.085	170.404
7.15	164.226	7.15	165.373	7.15	165.024	7.15	165.848	7.15	173.447	7.15	171.101			7.15	173.376	7.15	172.061	7.15	172.709	7.15	178.008	7.15	169.753	7.15	174.897	7.15	173.718	7.15	204.134			7.15	172.136			7.15	171.788	7.15	173.273	7.15	169.923	7.15	175.119	7.15	174.899	7.15	173.662	7.15	170.31
7.215	164.344	7.215	165.503	7.215	164.776	7.215	165.606	7.215	173.639	7.215	171.244			7.215	173.222	7.215	172.254	7.215	172.904	7.215	178.579	7.215	170.315	7.215	175.563	7.215	174.24	7.215	210.952			7.215	172.699			7.215	171.825	7.215	173.791	7.215	169.834	7.215	174.655	7.215	175.431	7.215	173.618	7.215	170.374
7.28	164.506	7.28	165.857	7.28	164.483	7.28	165.643	7.28	174.659	7.28	171.261			7.28	173.237	7.28	172.616	7.28	173.244	7.28	177.393	7.28	170.622	7.28	176.223	7.28	174.435	7.28	204.096			7.28	173.22			7.28	171.921	7.28	173.718	7.28	169.856	7.28	174.709	7.28	175.582	7.28	173.496	7.28	170.384
7.345	164.55	7.345	166.364	7.345	164.345	7.345	165.833	7.345	177.091	7.345	171.205			7.345	173.38	7.345	172.83	7.345	173.687	7.345	175.209	7.345	170.457	7.345	176.99	7.345	174.601	7.345	191.097			7.345	173.653			7.345	172.107	7.345	173.089	7.345	169.876	7.345	175.438	7.345	174.912	7.345	173.726	7.345	170.288
7.41	164.418	7.41	166.711	7.41	164.416	7.41	166.011	7.41	181.079	7.41	171.09			7.41	173.517	7.41	172.837	7.41	174.192			7.41	170.098	7.41	177.714	7.41	174.894	7.41	182.237			7.41	174.166			7.41	172.556	7.41	172.325	7.41	169.922	7.41	176.695	7.41	173.833	7.41	174.223	7.41	170.27
7.475	164.317	7.475	166.741	7.475	164.589	7.475	166.32	7.475	184.451	7.475	170.867			7.475	173.76	7.475	172.81	7.475	174.432			7.475	170.054	7.475	177.899			7.475	178.085			7.475	174.59			7.475	173.192	7.475	171.639	7.475	170.033	7.475	178.247	7.475	173.201	7.475	174.666	7.475	170.383
7.54	164.504	7.54	166.644	7.54	164.797	7.54	166.673	7.54	183.875	7.54	170.837			7.54	174.074	7.54	172.532	7.54	174.112					7.54	177.931			7.54	176.384			7.54	174.337			7.54	173.535			7.54	170.134	7.54	179.576	7.54	173.041	7.54	175.471	7.54	170.437
7.605	164.862	7.605	166.55	7.605	165.009	7.605	166.803	7.605	180.263	7.605	171.015			7.605	174.207	7.605	172.138	7.605	173.482					7.605	178.208			7.605	175.845			7.605	173.386			7.605	173.345			7.605	169.951	7.605	180.169	7.605	172.864	7.605	176.925	7.605	170.356
7.67	165.094	7.67	166.351	7.67	164.984			7.67	177.456	7.67	170.935			7.67	174.243	7.67	171.611	7.67	172.849					7.67	177.891			7.67	175.58			7.67	172.478			7.67	172.829			7.67	169.771	7.67	179.798	7.67	172.642	7.67	177.428	7.67	170.214
7.735	165.047	7.735	166.136	7.735	164.697			7.735	176.503	7.735	170.516			7.735	174.585	7.735	171.216	7.735	172.409					7.735	176.61			7.735	175.2			7.735	172.124			7.735	172.348			7.735	169.748	7.735	178.506	7.735	172.64	7.735	176.469	7.735	170.05
7.8	164.879	7.8	165.898	7.8	164.506			7.8	177.293	7.8	170.137			7.8	175.167	7.8	171.097	7.8	172.243					7.8	175.372			7.8	174.582			7.8	172.071			7.8	172.039			7.8	169.877	7.8	176.902	7.8	172.803	7.8	175.202	7.8	169.964
7.865	164.761	7.865	165.57	7.865	164.515			7.865	179.329	7.865	169.911			7.865	175.548	7.865	171.012	7.865	172.481					7.865	174.812			7.865	174.004			7.865	171.954			7.865	171.929			7.865	170.031	7.865	175.559	7.865	172.853	7.865	174.014	7.865	169.999
7.93	164.664	7.93	165.241	7.93	164.566			7.93	181.987	7.93	169.957			7.93	175.68	7.93	170.763	7.93	173.396					7.93	174.755			7.93	173.837			7.93	171.718			7.93	172.069			7.93	169.912	7.93	174.628	7.93	172.804	7.93	173.094	7.93	170.093
7.995	164.533	7.995	165.042	7.995	164.662			7.995	183.673	7.995	170.266			7.995	175.78	7.995	170.596	7.995	174.79					7.995	174.808			7.995	173.965			7.995	171.455			7.995	172.182			7.995	169.568	7.995	174.16	7.995	172.819	7.995	172.465	7.995	170.237
8.06	164.483	8.06	164.989	8.06	164.888			8.06	181.69	8.06	170.694			8.06	175.619	8.06	170.623	8.06	175.927					8.06	175.12			8.06	174.351			8.06	171.32			8.06	171.962			8.06	169.362	8.06	174.168	8.06	172.794			8.06	170.248
8.125	164.563	8.125	164.912	8.125	165.104			8.125	178.14	8.125	170.995			8.125	175.067	8.125	170.864	8.125	176.555					8.125	176.053			8.125	175.47			8.125	171.416			8.125	171.728			8.125	169.415	8.125	174.412	8.125	172.628			8.125	170.004
8.19	164.67	8.19	164.757	8.19	165.014			8.19	175.804	8.19	171.063			8.19	174.688	8.19	171.345	8.19	177.006					8.19	177.419			8.19	177.097			8.19	171.665			8.19	171.808			8.19	169.518	8.19	174.547	8.19	172.429			8.19	169.634
8.255	164.662	8.255	164.714	8.255	164.678			8.255	174.673	8.255	170.855			8.255	174.799	8.255	172.105	8.255	177.356					8.255	179.721			8.255	177.712			8.255	171.846			8.255	171.925			8.255	169.446	8.255	174.538	8.255	172.27			8.255	169.439
8.32	164.543	8.32	164.781	8.32	164.403			8.32	173.817	8.32	170.46			8.32	175.004	8.32	173.278	8.32	177.455					8.32	183.595							8.32	171.792			8.32	171.775			8.32	169.298	8.32	174.575
8.385	164.498	8.385	164.858	8.385	164.36			8.385	173.001	8.385	170.255			8.385	174.776	8.385	175.486	8.385	177.412					8.385	189.414							8.385	171.5			8.385	171.619			8.385	169.276	8.385	174.974
8.45	164.575	8.45	165.047					8.45	172.263	8.45	170.268			8.45	174.281	8.45	178.189	8.45	177.311					8.45	193.353							8.45	171.129			8.45	171.85			8.45	169.371	8.45	175.707
8.515	164.664	8.515	165.213					8.515	171.778	8.515	170.166			8.515	174.044	8.515	179.432	8.515	176.977					8.515	190.267							8.515	170.821			8.515	172.259			8.515	169.511	8.515	176.022
8.58	164.69	8.58	165.151					8.58	171.529	8.58	170.079			8.58	174.105	8.58	177.501	8.58	176.599					8.58	183.511							8.58	170.525			8.58	172.29			8.58	169.6	8.58	175.544
8.645	164.616	8.645	164.984											8.645	173.834	8.645	174.913	8.645	176.709					8.645	178.41							8.645	170.285			8.645	172.134			8.645	169.443
8.71	164.495	8.71	165.065											8.71	173.067	8.71	172.766	8.71	177.105					8.71	175.811							8.71	170.296			8.71	172.358
8.775	164.525	8.775	165.412											8.775	172.464	8.775	171.387	8.775	177.251					8.775	174.774							8.775	170.557			8.775	172.744
		8.84	165.814											8.84	172.448	8.84	170.743	8.84	177.375					8.84	174.727							8.84	170.748			8.84	172.721
		8.905	166.141											8.905	172.601	8.905	170.551	8.905	177.619					8.905	175.271							8.905	170.78			8.905	172.473
		8.97	166.199											8.97	172.477			8.97	177.168					8.97	175.631							8.97	170.909			8.97	172.435
		9.035	166.029															9.035	175.817													9.035	171.173			9.035	172.568
		9.1	165.938															9.1	174.674													9.1	171.514			9.1	172.871
		9.165	166.097															9.165	174.185													9.165	172.095			9.165	173.285
		9.23	166.28															9.23	174.013																	9.23	173.297
		9.295	166.251															9.295	173.983																	9.295	172.883
		9.36	166.132															9.36	173.874																	9.36	172.563
		9.425	165.941															9.425	173.362																	9.425	172.439
		9.49	165.666															9.49	172.713																	9.49	172.393
		9.555	165.337															9.555	172.304																	9.555	172.452
		9.62	165.069															9.62	172.217																	9.62	172.682
		9.685	164.986																																	9.685	173.017
		9.75	165.279																																	9.75	173.205
		9.815	165.803																																	9.815	172.986
		9.88	166.047																																	9.88	172.337
		9.945	166.072
		10.01	166.142
		10.075	166.245
		10.14	166.257
		10.205	166.27
		10.27	166.479
		10.335	166.844
		10.4	167.048
		10.465	166.951
		10.53	166.667
		10.595	166.267
		10.66	165.803
		10.725	165.455
		10.79	165.357
[truncated: 276 more columns]

## Sheet: Sema7A-tdTomato correlation
2 dpf	NM_0	NM_0	NM_0	NM_0	NM_0	NM_1	NM_1	NM_1	NM_1	NM_2	NM_2	NM_2	NM_2	NM_2	NM_2	NM_2	NM_3	NM_3	NM_3	NM_3	NM_3	NM_4	NM_4	NM_4	NM_5	NM_6	NM_6	NM_6	NM_6	NM_6	NM_6	NM_7	NM_7	NM_7	NM_8	NM_8	NM_8	NM_8	NM_9	NM_9	NM_9	NM_10	NM_10	NM_10	NM_10	NM_10	NM_11	NM_11	NM_11
Sema7a	133.721	131.162	138.115	134.519	139.134	171.652	177.49	169.196	175.055	169.71	177.902	177.945	198.036	182.212	175.881	177.622	201.315	199.02	196.479	200.166	213.411	246.979	235.528	267.955	215.64	230.236	238.066	226.752	215.183	226.727	231.953	184.022	177.735	183.376	185.189	182.27	188.332	209.11	221.376	221.53	204.293	167.079	165.632	167.871	190.328	174.299	209.359	185.968	177.89
td-Tom	445.717	290.817	284.514	338.967	466.327	385.357	468.333	361.02	333.465	384.447	715.093	376.794	435.091	1082.5	490.793	386.344	452.734	489.226	512.942	462.086	496.512	500.022	711.99	500.535	396.41	699.324	560.444	527.81	431.596	611.727	553.04	410.702	512.474	603.069	381.814	366.638	344.237	546.49	596.876	498.96	404.925	371.021	482.53	441.014	527.347	320.184	488.22	489.953	352.395
Max Sema7a	267.955	267.955	267.955	267.955	267.955	267.955	267.955	267.955	267.955	267.955	267.955	267.955	267.955	267.955	267.955	267.955	267.955	267.955	267.955	267.955	267.955	267.955	267.955	267.955	267.955	267.955	267.955	267.955	267.955	267.955	267.955	267.955	267.955	267.955	267.955	267.955	267.955	267.955	267.955	267.955	267.955	267.955	267.955	267.955	267.955	267.955	267.955	267.955	267.955
Max td-Tom	1082.5	1082.5	1082.5	1082.5	1082.5	1082.5	1082.5	1082.5	1082.5	1082.5	1082.5	1082.5	1082.5	1082.5	1082.5	1082.5	1082.5	1082.5	1082.5	1082.5	1082.5	1082.5	1082.5	1082.5	1082.5	1082.5	1082.5	1082.5	1082.5	1082.5	1082.5	1082.5	1082.5	1082.5	1082.5	1082.5	1082.5	1082.5	1082.5	1082.5	1082.5	1082.5	1082.5	1082.5	1082.5	1082.5	1082.5	1082.5	1082.5
2 dpf Normalized
Sema7a	0.499043	0.489493	0.515441	0.502021	0.519244	0.6406	0.662387	0.631434	0.6533	0.633353	0.663925	0.664085	0.739064	0.68001	0.656383	0.66288	0.751302	0.742737	0.733254	0.747013	0.796443	0.921718	0.878983	1	0.804762	0.859234	0.888455	0.846232	0.803056	0.846138	0.865642	0.686765	0.663302	0.684354	0.69112	0.680226	0.702849	0.780392	0.826169	0.826743	0.762415	0.623534	0.618134	0.62649	0.710298	0.650479	0.781321	0.694027	0.66388
td-Tom	0.411749	0.268654	0.262831	0.313135	0.430789	0.355989	0.432642	0.333507	0.308052	0.355149	0.660596	0.348079	0.401933	1	0.45339	0.356901	0.418232	0.451943	0.473851	0.426871	0.458673	0.461916	0.65773	0.46239	0.3662	0.646029	0.517733	0.487586	0.398704	0.565108	0.510893	0.379403	0.473419	0.55711	0.352716	0.338697	0.318003	0.504843	0.551389	0.460935	0.374066	0.342746	0.445757	0.407405	0.487158	0.295783	0.451013	0.452614	0.325539
3 dpf	NM_0	NM_0	NM_0	NM_0	NM_1	NM_1	NM_1	NM_1	NM_2	NM_2	NM_2	NM_2	NM_2	NM_3	NM_3	NM_3	NM_3	NM_4	NM_4	NM_4	NM_4	NM_5	NM_5	NM_5	NM_6	NM_6	NM_6	NM_7	NM_7	NM_8	NM_8	NM_8	NM_9	NM_9	NM_9	NM_10	NM_10	NM_10	NM_11	NM_11	NM_11	NM_11	NM_12	NM_12	NM_12	NM_13	NM_13	NM_13
Sema7a	178.717	200.277	198.168	202.035	219.112	224.776	222.264	243.298	236.542	234.51	232.844	238.442	229.055	296.454	337.501	295.136	322.684	276.357	316.403	322.785	316.138	247.143	251.215	263.99	235.862	219.531	225.294	214.665	213.025	191.71	192.289	194.171	211.437	206.497	220.48	267.609	230.306	250.406	197.977	209.535	213.618	219.054	195.272	197.96	201.436	261.888	281.061	231.953
td-Tom	355.42	720.115	460.088	497.416	413.99	947.433	564.029	551.914	532.951	912.279	497.706	498.131	702.326	1558.34	1327.6	928.575	945.597	509.163	1198.73	921.733	896.805	353.964	615.161	965.367	566.846	438.57	578.23	599.42	359.218	363.824	519.834	442.462	763.587	529.447	536.015	746.003	828.713	929.274	448.971	484.01	563.637	497.786	595.026	546.627	575.704	653.152	690.489	428.726
Max Sema7a	337.501	337.501	337.501	337.501	337.501	337.501	337.501	337.501	337.501	337.501	337.501	337.501	337.501	337.501	337.501	337.501	337.501	337.501	337.501	337.501	337.501	337.501	337.501	337.501	337.501	337.501	337.501	337.501	337.501	337.501	337.501	337.501	337.501	337.501	337.501	337.501	337.501	337.501	337.501	337.501	337.501	337.501	337.501	337.501	337.501	337.501	337.501	337.501
Max td-Tom	1558.34	1558.34	1558.34	1558.34	1558.34	1558.34	1558.34	1558.34	1558.34	1558.34	1558.34	1558.34	1558.34	1558.34	1558.34	1558.34	1558.34	1558.34	1558.34	1558.34	1558.34	1558.34	1558.34	1558.34	1558.34	1558.34	1558.34	1558.34	1558.34	1558.34	1558.34	1558.34	1558.34	1558.34	1558.34	1558.34	1558.34	1558.34	1558.34	1558.34	1558.34	1558.34	1558.34	1558.34	1558.34	1558.34	1558.34	1558.34
3 dpf Normalized
Sema7a	0.52953	0.593412	0.587163	0.59862	0.649219	0.666001	0.658558	0.720881	0.700863	0.694842	0.689906	0.706493	0.678679	0.87838	1	0.874474	0.956098	0.818833	0.937488	0.956397	0.936702	0.732273	0.744339	0.78219	0.698848	0.65046	0.667536	0.636043	0.631183	0.568028	0.569743	0.57532	0.626478	0.611841	0.653272	0.792913	0.682386	0.741942	0.586597	0.620843	0.63294	0.649047	0.578582	0.586546	0.596846	0.775962	0.832771	0.687266
td-Tom	0.228076	0.462104	0.295243	0.319196	0.265661	0.607976	0.361942	0.354168	0.341999	0.585418	0.319382	0.319655	0.450689	1	0.851933	0.595875	0.606798	0.326734	0.769233	0.591484	0.575488	0.227142	0.394754	0.619485	0.36375	0.281434	0.371055	0.384653	0.230513	0.233469	0.333582	0.283932	0.490001	0.339751	0.343966	0.478717	0.531793	0.596323	0.288109	0.310594	0.361691	0.319434	0.381833	0.350775	0.369434	0.419133	0.443093	0.275117
4 dpf	NM_0	NM_0	NM_0	NM_0	NM_1	NM_1	NM_1	NM_1	NM_2	NM_2	NM_2	NM_3	NM_3	NM_3	NM_3	NM_4	NM_4	NM_4	NM_5	NM_5	NM_5	NM_6	NM_6	NM_7	NM_7	NM_7	NM_7	NM_8	NM_8	NM_8	NM_8	NM_9	NM_9	NM_9	NM_9	NM_10	NM_10	NM_11	NM_11	NM_11
Sema7a	192.991	216.733	201.159	183.662	231.572	220.987	234.834	217.728	236.58	266.95	256.088	297.439	307.881	273.342	324.478	227.259	237.047	264.17	266.212	264.262	262.361	264.802	315.503	301.109	316.176	286.678	291.356	255.95	255.852	289.73	280.217	207.1	216.424	203.142	219.852	231.08	224.713	233.764	247.787	221.527
td-Tom	281.442	278.873	339.541	310.731	410.695	302.173	336.419	289.251	631.052	306.437	323.687	374.578	331.3	306.149	380.871	557.863	406.172	302.68	297.461	430.551	418.266	424.327	385.764	379.662	481.421	360.227	359.053	296.878	300.177	429.18	278.754	261.926	306.642	364.38	262.079	262.687	369.05	329.037	293	235.021
Max Sema7a	324.478	324.478	324.478	324.478	324.478	324.478	324.478	324.478	324.478	324.478	324.478	324.478	324.478	324.478	324.478	324.478	324.478	324.478	324.478	324.478	324.478	324.478	324.478	324.478	324.478	324.478	324.478	324.478	324.478	324.478	324.478	324.478	324.478	324.478	324.478	324.478	324.478	324.478	324.478	324.478
Max td-Tom	631.052	631.052	631.052	631.052	631.052	631.052	631.052	631.052	631.052	631.052	631.052	631.052	631.052	631.052	631.052	631.052	631.052	631.052	631.052	631.052	631.052	631.052	631.052	631.052	631.052	631.052	631.052	631.052	631.052	631.052	631.052	631.052	631.052	631.052	631.052	631.052	631.052	631.052	631.052	631.052
4 dpf Normalized
Sema7a	0.594774	0.667944	0.619946	0.566023	0.713676	0.681054	0.723729	0.67101	0.72911	0.822706	0.789231	0.916669	0.94885	0.842405	1	0.700383	0.730549	0.814138	0.820432	0.814422	0.808563	0.816086	0.97234	0.92798	0.974414	0.883505	0.897922	0.788805	0.788503	0.892911	0.863593	0.638256	0.666991	0.626058	0.677556	0.712159	0.692537	0.720431	0.763648	0.682718
td-Tom	0.445989	0.441918	0.538056	0.492402	0.65081	0.47884	0.533108	0.458363	1	0.485597	0.512932	0.593577	0.524996	0.485141	0.603549	0.884021	0.643643	0.479644	0.471373	0.682275	0.662808	0.672412	0.611303	0.601633	0.762886	0.570836	0.568975	0.470449	0.475677	0.680102	0.441729	0.415062	0.485922	0.577417	0.415305	0.416268	0.584817	0.52141	0.464304	0.372427
[truncated: 9 more columns]

## Sheet: Sema7A membrane localization
Sema7A intensity distribution across hair-cell menbranes in 4dpf neuromasts
Cell membranes are marked by mScarlet
4dpf_mem-1				mem-2				mem-3				mem-4				mem-5				mem-6				mem-7				mem-8				mem-9				mem-10
Distance	mScarlet	Distance	Sema7A	Distance	mScarlet	Distance	Sema7A	Distance	mScarlet	Distance	Sema7A	Distance	mScarlet	Distance	Sema7A	Distance	mScarlet	Distance	Sema7A	Distance	mScarlet	Distance	Sema7A	Distance	mScarlet	Distance	Sema7A	Distance	mScarlet	Distance	Sema7A	Distance	mScarlet	Distance	Sema7A	Distance	mScarlet	Distance	Sema7A
0	1937.3	0	610.526	0	2138.23	0	571.182	0	2090.98	0	587.892	0	2836.33	0	620.034	0	2093.1	0	714.56	0	1927.22	0	593.177	0	2056.55	0	615.4	0	2411.23	0	632.185	0	2091.25	0	592.396	0	2177.9	0	696.549
0.065	1938.52	0.065	628.387	0.065	2214.31	0.065	586.625	0.065	2135.78	0.065	640.957	0.065	2884.51	0.065	633.788	0.065	2161.17	0.065	768.542	0.065	1972.23	0.065	598.135	0.065	2052.36	0.065	604.55	0.065	2409.53	0.065	645.01	0.065	2106.2	0.065	598.342	0.065	2176.18	0.065	758.462
0.13	1961.32	0.13	645.473	0.13	2275.79	0.13	635.586	0.13	2129.05	0.13	690.668	0.13	2907.12	0.13	659.721	0.13	2228.21	0.13	806.397	0.13	1994.33	0.13	601.976	0.13	2058.92	0.13	618.737	0.13	2372.73	0.13	662.906	0.13	2131.64	0.13	617.312	0.13	2228.65	0.13	829.729
0.195	1997.06	0.195	644.132	0.195	2317.95	0.195	648.758	0.195	2177.21	0.195	706.09	0.195	3012.35	0.195	660.454	0.195	2272.29	0.195	791.008	0.195	2045.35	0.195	661.451	0.195	2047.94	0.195	625.909	0.195	2317.03	0.195	685.654	0.195	2201.08	0.195	613.1	0.195	2254.66	0.195	864.386
0.26	2055.83	0.26	674.017	0.26	2358.86	0.26	665.016	0.26	2153.94	0.26	700.853	0.26	3094.9	0.26	696.069	0.26	2429.17	0.26	742.996	0.26	2095.58	0.26	721.581	0.26	2084.74	0.26	620.182	0.26	2296.48	0.26	695.359	0.26	2270.61	0.26	626.145	0.26	2317.71	0.26	890.743
0.325	2089.28	0.325	665.323	0.325	2424.61	0.325	682.923	0.325	2205.59	0.325	677.247	0.325	3141.32	0.325	712.593	0.325	2595.17	0.325	731.782	0.325	2106.76	0.325	796.945	0.325	2115.87	0.325	641.939	0.325	2306.14	0.325	754.017	0.325	2379.94	0.325	667.667	0.325	2392.12	0.325	807.31
0.39	2258.52	0.39	663.78	0.39	2501.11	0.39	685.138	0.39	2254.42	0.39	708.288	0.39	3194.99	0.39	746.431	0.39	2725.06	0.39	717.845	0.39	2188.7	0.39	890.792	0.39	2135.41	0.39	648.6	0.39	2315.86	0.39	810.834	0.39	2511.89	0.39	668.869	0.39	2367.98	0.39	702.942
0.455	2409.67	0.455	703.66	0.455	2547.61	0.455	716.189	0.455	2401.73	0.455	744.13	0.455	3266.51	0.455	844.304	0.455	2905.54	0.455	669.029	0.455	2249.52	0.455	934.539	0.455	2167.13	0.455	669.757	0.455	2357.24	0.455	808.493	0.455	2596.29	0.455	630.253	0.455	2280.48	0.455	617.245
0.52	2621.57	0.52	706.6	0.52	2577.19	0.52	719.71	0.52	2537.47	0.52	812.743	0.52	3255.31	0.52	883.132	0.52	3145.91	0.52	635.315	0.52	2313.09	0.52	918.482	0.52	2210.05	0.52	723.591	0.52	2361.56	0.52	842.28	0.52	2626.07	0.52	597.391	0.52	2176.57	0.52	561.615
0.585	2791.07	0.585	693.834	0.585	2635.76	0.585	751.6	0.585	2644.02	0.585	902.908	0.585	3235.91	0.585	929.234	0.585	3357.97	0.585	578.291	0.585	2379.72	0.585	862.151	0.585	2233.13	0.585	786.028	0.585	2424.88	0.585	842.565	0.585	2545.04	0.585	566.136	0.585	2060.65	0.585	534.255
0.65	2904.93	0.65	671.684	0.65	2616.88	0.65	784.584	0.65	2747.37	0.65	893.421	0.65	3218.64	0.65	921.517	0.65	3323.12	0.65	580.54	0.65	2461.37	0.65	799.365	0.65	2355.74	0.65	862.8	0.65	2419.78	0.65	807.816	0.65	2440.75	0.65	535.741	0.65	1985.7	0.65	524.948
0.715	2884.68	0.715	630.616	0.715	2636.72	0.715	762.803	0.715	2794.33	0.715	847.566	0.715	3135.75	0.715	948.06	0.715	3073.66	0.715	527.875	0.715	2556.51	0.715	748.231	0.715	2473.65	0.715	888.15	0.715	2434.7	0.715	804.742	0.715	2243.45	0.715	505.949	0.715	1966.21	0.715	557.417
0.78	2656.37	0.78	621.619	0.78	2590.7	0.78	776.839	0.78	2892.4	0.78	786.013	0.78	2998.3	0.78	855.563	0.78	2788.68	0.78	512.197	0.78	2675.25	0.78	730.379	0.78	2544.55	0.78	822.01	0.78	2544.84	0.78	816.409	0.78	2049.02	0.78	517.652	0.78	1944.61	0.78	541.412
0.845	2433.99	0.845	601.572	0.845	2594.82	0.845	725.577	0.845	2980.57	0.845	686.084	0.845	2827.46	0.845	788.157	0.845	2609.13	0.845	509.49	0.845	2818.76	0.845	704.169	0.845	2603.51	0.845	717.964	0.845	2602.88	0.845	799.765	0.845	1901.81	0.845	528.659	0.845	1933.05	0.845	543.128
0.91	2238.25	0.91	573.962	0.91	2589.48	0.91	682.827	0.91	2844.92	0.91	626.357	0.91	2739.88	0.91	741.382	0.91	2365.4	0.91	487.436	0.91	2992.73	0.91	688.177	0.91	2571.66	0.91	630.827	0.91	2629.66	0.91	770.771	0.91	1877.66	0.91	510.793
0.975	2130.68	0.975	566.411	0.975	2575.88	0.975	650.058	0.975	2763.38	0.975	587.914	0.975	2615.38	0.975	654.229	0.975	2214.96	0.975	519.764	0.975	3125.4	0.975	673.511	0.975	2472.03	0.975	589.3	0.975	2645.41	0.975	757.709	0.975	1823.87	0.975	506.408
1.04	2015.6	1.04	575.26	1.04	2547.08	1.04	638.531	1.04	2630.54	1.04	571.089	1.04	2512.06	1.04	647.226	1.04	2104.89	1.04	494.267	1.04	3103.66	1.04	663.932	1.04	2394.7	1.04	546.887	1.04	2733.98	1.04	733.622	1.04	1792.68	1.04	532.251
1.105	1930.34	1.105	583.101	1.105	2569.84	1.105	633.144	1.105	2429.88	1.105	568.838	1.105	2418.97	1.105	624.231	1.105	2032.65	1.105	473.978	1.105	3059.98	1.105	649.529	1.105	2237.99	1.105	511.589	1.105	2758.67	1.105	697.697	1.105	1789.26	1.105	548.552
1.17	1877.15	1.17	588.18	1.17	2500.34	1.17	611.479	1.17	2256.31	1.17	561.708	1.17	2330.1	1.17	597.543					1.17	2883.55	1.17	601.458	1.17	2117.12	1.17	507.691	1.17	2759.88	1.17	669.551
1.235	1864.17	1.235	594.971	1.235	2497.35	1.235	583.671	1.235	2147.85	1.235	555.848	1.235	2274.72	1.235	590.139					1.235	2731.72	1.235	576.382	1.235	2018.26	1.235	545.582	1.235	2688.92	1.235	627.095
				1.3	2420.6	1.3	560.702	1.3	2065.73	1.3	562.73									1.3	2567.07	1.3	586.511	1.3	2042.69	1.3	518.391	1.3	2655.32	1.3	610.869
				1.365	2334.26	1.365	557.462	1.365	1993.66	1.365	564.735									1.365	2396.76	1.365	564.677	1.365	1993.8	1.365	526.514	1.365	2643.39	1.365	588.161
				1.43	2235.27	1.43	574.92	1.43	1959.92	1.43	574.301									1.43	2171.68	1.43	548.062	1.43	1976.5	1.43	522.8	1.43	2530.92	1.43	586.057
				1.495	2141.9	1.495	576.948													1.495	2036.92	1.495	527.724					1.495	2444.41	1.495	572.003
				1.56	2049.49	1.56	602.4																					1.56	2369.85	1.56	549.571
																												1.625	2304.67	1.625	561
																												1.69	2211.06	1.69	575.625
																												1.755	2236.68	1.755	588.884
4dpf1_mem-1				4dpf1_mem-2				4dpf1_mem-3				4dpf1_mem-4				4dpf1_mem-5				4dpf1_mem-6				4dpf1_mem-7				4dpf1_mem-8				4dpf1_mem-9				4dpf1_mem-10
Distance	mScarlet	Distance	Sema7A	Distance	mScarlet	Distance	Sema7A	Distance	mScarlet	Distance	Sema7A	Distance	mScarlet	Distance	Sema7A	Distance	mScarlet	Distance	Sema7A	Distance	mScarlet	Distance	Sema7A	Distance	mScarlet	Distance	Sema7A	Distance	mScarlet	Distance	Sema7A	Distance	mScarlet	Distance	Sema7A	Distance	mScarlet	Distance	Sema7A
0	1635.91	0	1257.65	0	1441.35	0	1257.73	0	1514.88	0	684.757	0	1476.59	0	804.486	0	1385.01	0	609.433	0	1403.48	0	626.805	0	1518.81	0	759.344	0	1442.02	0	621.984	0	1383.57	0	663.704	0	1418.3	0	561.651
0.065	1598.68	0.065	1308.49	0.065	1442.62	0.065	1120.78	0.065	1545.81	0.065	706.338	0.065	1532.01	0.065	756.945	0.065	1401.43	0.065	603.987	0.065	1373.23	0.065	635.1	0.065	1564.53	0.065	771.213	0.065	1461.21	0.065	606.268	0.065	1390.45	0.065	658.734	0.065	1381.57	0.065	576.596
0.13	1572.64	0.13	1354.34	0.13	1450.85	0.13	1079.86	0.13	1607.09	0.13	726.975	0.13	1569.83	0.13	753.267	0.13	1436.86	0.13	608.411	0.13	1405.81	0.13	635.254	0.13	1598.93	0.13	794.056	0.13	1465.27	0.13	625.488	0.13	1417.33	0.13	708.828	0.13	1435.22	0.13	577.896
0.195	1543.82	0.195	1328.65	0.195	1522.74	0.195	1076.2	0.195	1647.66	0.195	753.156	0.195	1550.85	0.195	836.302	0.195	1420.18	0.195	635.046	0.195	1401.78	0.195	665.136	0.195	1587.53	0.195	781.372	0.195	1507.27	0.195	649.884	0.195	1421.49	0.195	688.647	0.195	1444.25	0.195	605.875
0.26	1591.16	0.26	1280.12	0.26	1535.9	0.26	1085.4	0.26	1651.22	0.26	772.128	0.26	1561.76	0.26	934.14	0.26	1420.02	0.26	642.911	0.26	1411.74	0.26	707.63	0.26	1591.69	0.26	816.619	0.26	1525.81	0.26	656.887	0.26	1422.22	0.26	714.115	0.26	1449.28	0.26	639.28
0.325	1632.53	0.325	1181.62	0.325	1557.69	0.325	1106.44	0.325	1680.42	0.325	802.032	0.325	1676.22	0.325	1087.33	0.325	1416.16	0.325	674.367	0.325	1385.28	0.325	755.344	0.325	1598.27	0.325	893.077	0.325	1606.96	0.325	669.409	0.325	1432.67	0.325	754.287	0.325	1437.5	0.325	663.63
0.39	1704.6	0.39	1152.12	0.39	1710.2	0.39	1104.31	0.39	1677.65	0.39	930.555	0.39	1771.26	0.39	1099.9	0.39	1493.99	0.39	700.019	0.39	1383.13	0.39	908.381	0.39	1569.85	0.39	979.39	0.39	1659.8	0.39	667.721	0.39	1447.12	0.39	762.074	0.39	1471.41	0.39	700.224
0.455	1888.77	0.455	1182.49	0.455	1881.35	0.455	1057.7	0.455	1714.46	0.455	1001.21	0.455	1950.6	0.455	1040.06	0.455	1522.47	0.455	704.304	0.455	1446.32	0.455	1076.52	0.455	1568.35	0.455	1015.32	0.455	1813.48	0.455	684.305	0.455	1442.44	0.455	822.524	0.455	1520.53	0.455	768.535
0.52	2064.51	0.52	1225.24	0.52	2000.3	0.52	963.84	0.52	1726.84	0.52	1123.88	0.52	2184.55	0.52	940.857	0.52	1543.01	0.52	759.733	0.52	1445.24	0.52	1281.48	0.52	1620.15	0.52	1100.6	0.52	1905.82	0.52	723.923	0.52	1452.27	0.52	983.127	0.52	1525.41	0.52	831.212
0.585	2213.52	0.585	1316.69	0.585	2066.15	0.585	831.416	0.585	1767.31	0.585	1168.8	0.585	2548.24	0.585	830.982	0.585	1599.46	0.585	822.319	0.585	1455.83	0.585	1482.43	0.585	1631.14	0.585	1156.15	0.585	2048.36	0.585	869.221	0.585	1476.76	0.585	1152.77	0.585	1605.84	0.585	925.85
0.65	2367.27	0.65	1428.29	0.65	2002.72	0.65	755.281	0.65	1867.33	0.65	1230.62	0.65	2874.34	0.65	721.803	0.65	1745.2	0.65	933.821	0.65	1531.85	0.65	1657.41	0.65	1702.13	0.65	1146.93	0.65	2197.98	0.65	1067.54	0.65	1525.9	0.65	1638.87	0.65	1632.09	0.65	1084.49
0.715	2535.39	0.715	1519.87	0.715	1871.72	0.715	675.867	0.715	1994.97	0.715	1226.66	0.715	3049.54	0.715	659.55	0.715	1843.38	0.715	969.195	0.715	1585.43	0.715	1820.95	0.715	1794.11	0.715	1075.97	0.715	2420.47	0.715	1315.64	0.715	1549.16	0.715	2437.99	0.715	1715.86	0.715	1220.13
0.78	2547.05	0.78	1570.29	0.78	1689.23	0.78	640.774	0.78	2070.73	0.78	1140.07	0.78	2948.26	0.78	623.079	0.78	2077.29	0.78	972.075	0.78	1628.93	0.78	1825.55	0.78	1881.71	0.78	992.876	0.78	2577.4	0.78	1497.53	0.78	1546.58	0.78	3501.9	0.78	1786.09	0.78	1329.89
0.845	2487.49	0.845	1531.44	0.845	1611.87	0.845	619.438	0.845	2153.36	0.845	1065.31	0.845	2643.5	0.845	564.185	0.845	2270.44	0.845	917.191	0.845	1703.85	0.845	1793.49	0.845	1920.99	0.845	874.454	0.845	2649.79	0.845	1496.89	0.845	1600.67	0.845	4089.12	0.845	1935.79	0.845	1445.59
0.91	2283.06	0.91	1347.42	0.91	1576.59	0.91	599.493	0.91	2088.68	0.91	966.863	0.91	2201.84	0.91	563.839	0.91	2437.38	0.91	837.964	0.91	1752.74	0.91	1694.53	0.91	1865.84	0.91	801.241	0.91	2817.9	0.91	1403.64	0.91	1716.24	0.91	3677.11	0.91	2051.95	0.91	1498.15
0.975	1984.9	0.975	1098.25	0.975	1509.51	0.975	598.176	0.975	1985.1	0.975	846.524	0.975	1900.82	0.975	540.035	0.975	2577.39	0.975	781.117	0.975	1724.96	0.975	1524.79	0.975	1808.66	0.975	704.593	0.975	2876.86	0.975	1224.15	0.975	1812.37	0.975	2588.33	0.975	2341.14	0.975	1539.52
1.04	1757.82	1.04	918.639	1.04	1530.75	1.04	584.941	1.04	1798.06	1.04	787.74	1.04	1667.37	1.04	542.361	1.04	2719.77	1.04	701.136	1.04	1770.97	1.04	1375.41	1.04	1716.73	1.04	652.648	1.04	2978.63	1.04	998.252	1.04	1958.05	1.04	1625.16	1.04	2526.57	1.04	1412.51
1.105	1613.29	1.105	748.408					1.105	1642.25	1.105	711.007	1.105	1606.45	1.105	534.847	1.105	2760.05	1.105	661.3	1.105	1798.04	1.105	1142.29	1.105	1597.57	1.105	619.684	1.105	3065.31	1.105	877.395	1.105	2007.9	1.105	1037.71	1.105	2715.31	1.105	1303.49
1.17	1492.49	1.17	685.327					1.17	1548.52	1.17	674.78	1.17	1524.73	1.17	513.887	1.17	2717.32	1.17	620.207	1.17	1785.44	1.17	981.056	1.17	1491.72	1.17	567.259	1.17	3014.98	1.17	774.525	1.17	1903.42	1.17	780.748	1.17	2750.05	1.17	1123.46
1.235	1451.45	1.235	640.59					1.235	1511.69	1.235	633.456	1.235	1416.03	1.235	509.958	1.235	2584.47	1.235	582.115	1.235	1774.07	1.235	819.444	1.235	1424.68	1.235	567.926	1.235	2813.56	1.235	668.953	1.235	1763.78	1.235	668.771	1.235	2654.63	1.235	926.917
1.3	1393.46	1.3	626.484					1.3	1502.69	1.3	641.499	1.3	1434.18	1.3	498.491	1.3	2376.07	1.3	582.155	1.3	1709.39	1.3	751.647	1.3	1384.19	1.3	558.22	1.3	2484.49	1.3	613.414	1.3	1618.87	1.3	631.395	1.3	2428	1.3	757.483
1.365	1400.61	1.365	635.03									1.365	1410.51	1.365	496.023	1.365	2075.09	1.365	566.397	1.365	1633.57	1.365	705.562	1.365	1374.92	1.365	562.77	1.365	2133.61	1.365	581.378	1.365	1516.3	1.365	612.411	1.365	2150.75	1.365	663.335
																1.43	1908.35	1.43	546.168	1.43	1567.1	1.43	665.866	1.43	1282.13	1.43	559.434	1.43	1807.98	1.43	578.748	1.43	1417	1.43	585.927	1.43	1857.18	1.43	568.005
																1.495	1788.79	1.495	550.678	1.495	1491.58	1.495	639.853	1.495	1297.49	1.495	555.064	1.495	1629.22	1.495	591.756	1.495	1391.12	1.495	560.048	1.495	1736.78	1.495	552.133
																1.56	1694.79	1.56	542.63	1.56	1456.16	1.56	641.128					1.56	1486.63	1.56	568.66	1.56	1379.35	1.56	560.312	1.56	1604.34	1.56	511.714
																1.625	1548.17	1.625	528.528	1.625	1445.57	1.625	625.271									1.625	1399.17	1.625	554.653	1.625	1477.97	1.625	491.227
																				1.69	1411.77	1.69	600.497									1.69	1348.18	1.69	555.395	1.69	1448.11	1.69	473.052
																				1.755	1377.44	1.755	613.822									1.755	1327.69	1.755	560.762	1.755	1403.16	1.755	485.221
																																				1.82	1386.21	1.82	488.923
4dpf2_mem-1				4dpf2_mem-2				4dpf2_mem-3				4dpf2_mem-4				4dpf2_mem-5				4dpf2_mem-6				4dpf2_mem-7				4dpf2_mem-8				4dpf2_mem-9				4dpf2_mem-10
Distance	mScarlet	Distance	Sema7A	Distance	mScarlet	Distance	Sema7A	Distance	mScarlet	Distance	Sema7A	Distance	mScarlet	Distance	Sema7A	Distance	mScarlet	Distance	Sema7A	Distance	mScarlet	Distance	Sema7A	Distance	mScarlet	Distance	Sema7A	Distance	mScarlet	Distance	Sema7A	Distance	mScarlet	Distance	Sema7A	Distance	mScarlet	Distance	Sema7A
0	1275.4	0	728.924	0	1176.69	0	938.027	0	1278.54	0	640.173	0	1740.7	0	695.774	0	1448.35	0	744.884	0	1186.56	0	701.909	0	1585.14	0	751.461	0	1587.43	0	641.98	0	1226.51	0	623.809	0	1556.45	0	649.436
0.065	1287.36	0.065	741.07	0.065	1238.76	0.065	1020.67	0.065	1319.77	0.065	648.432	0.065	1734.19	0.065	640.957	0.065	1497.86	0.065	714.911	0.065	1186.05	0.065	725.262	0.065	1633.97	0.065	719.839	0.065	1650.87	0.065	650.167	0.065	1244.54	0.065	590.216	0.065	1560.79	0.065	633.466
0.13	1285.84	0.13	712.916	0.13	1238.3	0.13	1040.71	0.13	1314.94	0.13	681.905	0.13	1743.45	0.13	633.458	0.13	1507.28	0.13	683.855	0.13	1217.55	0.13	767.737	0.13	1626.04	0.13	724.01	0.13	1731.75	0.13	682.02	0.13	1275.74	0.13	603.672	0.13	1565.46	0.13	657.141
0.195	1291.68	0.195	743.48	0.195	1249.46	0.195	1081.83	0.195	1301.02	0.195	700.47	0.195	1718.07	0.195	647.746	0.195	1493.57	0.195	654.795	0.195	1201.59	0.195	811.995	0.195	1630.81	0.195	706.949	0.195	1856.39	0.195	712.116	0.195	1239.81	0.195	577.457	0.195	1536.67	0.195	707.187
0.26	1311.89	0.26	795.697	0.26	1264.63	0.26	1139.43	0.26	1306.79	0.26	726.436	0.26	1767.26	0.26	659.043	0.26	1538	0.26	683.523	0.26	1223.83	0.26	837.629	0.26	1627.92	0.26	705.046	0.26	1925.83	0.26	764.347	0.26	1246.06	0.26	581.434	0.26	1550.1	0.26	741.075
0.325	1356.92	0.325	869.753	0.325	1236.35	0.325	1214.74	0.325	1317.44	0.325	742.508	0.325	1804.97	0.325	709.001	0.325	1565.64	0.325	718.284	0.325	1235.92	0.325	846.244	0.325	1689.95	0.325	769.104	0.325	2091.66	0.325	786.889	0.325	1293.46	0.325	606.851	0.325	1621.45	0.325	787.209
0.39	1382.19	0.39	988.678	0.39	1265.66	0.39	1261.42	0.39	1338.22	0.39	768.906	0.39	1815.32	0.39	825.73	0.39	1622.2	0.39	835.57	0.39	1238.12	0.39	886.29	0.39	1724.33	0.39	873.095	0.39	2307.83	0.39	849.905	0.39	1326.67	0.39	635.118	0.39	1664.98	0.39	879.925
0.455	1421.54	0.455	1142.92	0.455	1285.25	0.455	1261.86	0.455	1391.87	0.455	857.193	0.455	1838.53	0.455	1005.93	0.455	1672.69	0.455	959.078	0.455	1254.57	0.455	909.65	0.455	1791.62	0.455	1109.72	0.455	2390.26	0.455	906.255	0.455	1280.51	0.455	618.003	0.455	1785.6	0.455	1080.04
0.52	1495.43	0.52	1305.01	0.52	1299.05	0.52	1249.09	0.52	1427.66	0.52	984.485	0.52	1857.73	0.52	1352.62	0.52	1719	0.52	1185.29	0.52	1233.03	0.52	912.241	0.52	1824.45	0.52	1439.27	0.52	2524.53	0.52	1013.33	0.52	1326.51	0.52	714.437	0.52	1883.88	0.52	1237.4
0.585	1523.68	0.585	1375.88	0.585	1371.29	0.585	1254.67	0.585	1472.68	0.585	1228.86	0.585	1938.25	0.585	1724.82	0.585	1818.25	0.585	1407.2	0.585	1225.75	0.585	946.238	0.585	1856.87	0.585	1758.43	0.585	2521.38	0.585	1272.5	0.585	1347.15	0.585	833.987	0.585	1981.33	0.585	1349.17
0.65	1602.07	0.65	1491.22	0.65	1373.46	0.65	1256.12	0.65	1592.13	0.65	1523.29	0.65	1932.73	0.65	2149.61	0.65	1962.07	0.65	1428.5	0.65	1254.39	0.65	979.922	0.65	1964.29	0.65	2050.36	0.65	2550.88	0.65	1643.25	0.65	1446.37	0.65	996.707	0.65	2104.54	0.65	1309.63
0.715	1705.36	0.715	1562.46	0.715	1446.37	0.715	1261.69	0.715	1688.37	0.715	1761.6	0.715	2064.22	0.715	2232.87	0.715	2134.12	0.715	1280.7	0.715	1242.93	0.715	1080.34	0.715	2073.45	0.715	1991	0.715	2540.46	0.715	2016.65	0.715	1476.58	0.715	1207.14	0.715	2082.05	0.715	1042.23
0.78	1901.59	0.78	1631.51	0.78	1537.54	0.78	1290.33	0.78	1875.57	0.78	1973.58	0.78	2222.88	0.78	1930.56	0.78	2368.61	0.78	1055.1	0.78	1258.5	0.78	1193.6	0.78	2215.89	0.78	1680.96	0.78	2465.47	0.78	2023.19	0.78	1581.03	0.78	1451.89	0.78	2133.49	0.78	842.384
0.845	2110.63	0.845	1567.68	0.845	1663.2	0.845	1366.99	0.845	2116.42	0.845	2018.59	0.845	2397.95	0.845	1457.34	0.845	2547.42	0.845	889.173	0.845	1264.35	0.845	1259.37	0.845	2424.92	0.845	1289.97	0.845	2338.63	0.845	1639.04	0.845	1601.95	0.845	1569.02	0.845	2121.26	0.845	706.286
0.91	2346.03	0.91	1480.05	0.91	1820.92	0.91	1308.12	0.91	2422.7	0.91	1914.87	0.91	2539.51	0.91	1075.36	0.91	2664.99	0.91	764.85	0.91	1281.31	0.91	1325.93	0.91	2588.24	0.91	977.634	0.91	2035.54	0.91	1167.39	0.91	1702	0.91	1490.31	0.91	2015.86	0.91	629.224
0.975	2536.27	0.975	1217.24	0.975	1939.61	0.975	1245.04	0.975	2717.71	0.975	1599	0.975	2645.84	0.975	792.449	0.975	2696.03	0.975	673.432	0.975	1341.79	0.975	1371.5	0.975	2697.45	0.975	746.354	0.975	1792.42	0.975	903.908	0.975	1883.59	0.975	1251.11	0.975	1814.13	0.975	579.768
1.04	2633.98	1.04	1026.56	1.04	1961.43	1.04	1094.66	1.04	3054.53	1.04	1404.04	1.04	2725.62	1.04	670.78	1.04	2636.54	1.04	641.862	1.04	1399.79	1.04	1308.35	1.04	2750.69	1.04	635.673	1.04	1636.38	1.04	760.026	1.04	2004.68	1.04	1034.57	1.04	1549.43	1.04	572.411
1.105	2561.31	1.105	884.28	1.105	1882.86	1.105	950.802	1.105	3238.77	1.105	1204.34	1.105	2776.01	1.105	584.105	1.105	2416.29	1.105	611.67	1.105	1515.96	1.105	1208.12	1.105	2765.51	1.105	570.347	1.105	1513.62	1.105	708.471	1.105	2141.34	1.105	858.873	1.105	1373.25	1.105	584.674
1.17	2404.87	1.17	814.536	1.17	1727.95	1.17	815.175	1.17	3130.19	1.17	1017.34	1.17	2662.11	1.17	552.001	1.17	2113.68	1.17	575.445	1.17	1653.66	1.17	1043.02	1.17	2604.2	1.17	555.985	1.17	1450.23	1.17	684.429	1.17	2295.65	1.17	757.51	1.17	1287.66	1.17	586.801
1.235	2185.91	1.235	789.828	1.235	1560.54	1.235	763.408	1.235	2945.49	1.235	864.054	1.235	2439.7	1.235	536.989	1.235	1854.08	1.235	558.136	1.235	1850.16	1.235	845.611	1.235	2352.86	1.235	544.361	1.235	1373.44	1.235	692.871	1.235	2250.08	1.235	705.287	1.235	1255.52	1.235	615.872
1.3	1915.45	1.3	778.719	1.3	1417.92	1.3	686.048	1.3	2599.23	1.3	785.678	1.3	2134.1	1.3	530.445	1.3	1667.88	1.3	565.797	1.3	2069.07	1.3	721.092	1.3	2117.26	1.3	524.074	1.3	1352.46	1.3	737.44	1.3	2217.86	1.3	640.456	1.3	1218.3	1.3	578.413
1.365	1684.33	1.365	727.7	1.365	1316.53	1.365	647.485	1.365	2209.98	1.365	715.323	1.365	1921.65	1.365	530.505	1.365	1592.81	1.365	563.333	1.365	2222.02	1.365	661.635	1.365	1935.72	1.365	512.875	1.365	1345.23	1.365	798.893	1.365	2037.95	1.365	618.541	1.365	1177.8	1.365	564.962
1.43	1462.64	1.43	640.797	1.43	1235.86	1.43	625.149	1.43	1834.89	1.43	688.227	1.43	1737.75	1.43	520.988					1.43	2248.64	1.43	602.336	1.43	1786.33	1.43	522.327	1.43	1316.99	1.43	877.216	1.43	1850.35	1.43	623.954	1.43	1162.09	1.43	529.387
1.495	1329.37	1.495	615.615	1.495	1183.59	1.495	603.584	1.495	1561.88	1.495	672.846	1.495	1647.61	1.495	541.153					1.495	2135.07	1.495	588.223	1.495	1673.4	1.495	520.424	1.495	1315.72	1.495	946.66	1.495	1708.77	1.495	623.668	1.495	1165.51	1.495	509.129
1.56	1260.55	1.56	599.579	1.56	1181.9	1.56	607.647	1.56	1405.15	1.56	639.37	1.56	1522.63	1.56	565.275					1.56	1947.19	1.56	585.553	1.56	1567.17	1.56	535.316	1.56	1292.29	1.56	910.787	1.56	1538.91	1.56	588.666
1.625	1192.89	1.625	624.221	1.625	1172.28	1.625	656.326	1.625	1299.91	1.625	637.436	1.625	1493.38	1.625	568.661					1.625	1679.26	1.625	587.659	1.625	1536.97	1.625	540.568	1.625	1335.64	1.625	802.925	1.625	1438.89	1.625	583.27
1.69	1151.35	1.69	657.466	1.69	1157.6	1.69	700.099	1.69	1226.06	1.69	625.405	1.69	1459.41	1.69	547.469					1.69	1493.36	1.69	540.075	1.69	1508.82	1.69	524.517					1.69	1390.05	1.69	618.231
1.755	1141.3	1.755	669.128	1.755	1125.86	1.755	684.993	1.755	1183.67	1.755	618.226													1.755	1458.19	1.755	567.19					1.755	1376.8	1.755	597.344
				1.82	1114.22	1.82	714.429	1.82	1127.68	1.82	599.308													1.82	1448.47	1.82	578.874					1.82	1323.7	1.82	605.679
				1.885	1129.63	1.885	747.106																	1.885	1455.53	1.885	574.631					1.885	1295.57	1.885	578.818
				1.95	1134.37	1.95	741.029																	1.95	1389.7	1.95	573.102					1.95	1297.04	1.95	580.819
				2.015	1126.96	2.015	775																	2.015	1374.6	2.015	565.975
				2.08	1131.64	2.08	787.681																	2.08	1371.99	2.08	528.652
				2.145	1143.19	2.145	787.992																	2.145	1352.51	2.145	528.075
				2.21	1136.91	2.21	756.262																	2.21	1325.79	2.21	514.166
4dpf3_mem-1				4dpf3_mem-2				4dpf3_mem-3				4dpf3_mem-4				4dpf3_mem-5				4dpf3_mem-6				4dpf3_mem-7				4dpf3_mem-8				4dpf3_mem-9				4dpf3_mem-10
Distance	mScarlet	Distance	Sema7A	Distance	mScarlet	Distance	Sema7A	Distance	mScarlet	Distance	Sema7A	Distance	mScarlet	Distance	Sema7A	Distance	mScarlet	Distance	Sema7A	Distance	mScarlet	Distance	Sema7A	Distance	mScarlet	Distance	Sema7A	Distance	mScarlet	Distance	Sema7A	Distance	mScarlet	Distance	Sema7A	Distance	mScarlet	Distance	Sema7A
0	1140.54	0	725.659	0	1452.01	0	462.339	0	1748.31	0	570.022	0	1196.47	0	471.857	0	1100.7	0	473.969	0	978.903	0	593.43	0	1155.62	0	674.281	0	1250.66	0	537.117	0	1290.85	0	557.623	0	1227.53	0	487.481
0.065	1130.44	0.065	694.298	0.065	1501.88	0.065	471.272	0.065	1871.45	0.065	571.367	0.065	1218.35	0.065	470.823	0.065	1173.2	0.065	472.745	0.065	974.839	0.065	573.898	0.065	1193.04	0.065	684.646	0.065	1246.96	0.065	524.008	0.065	1242.48	0.065	556.022	0.065	1289.61	0.065	490.868
0.13	1122.6	0.13	651.732	0.13	1563.33	0.13	484.622	0.13	2035.12	0.13	615.668	0.13	1295.75	0.13	482.002	0.13	1350.58	0.13	479.887	0.13	998.378	0.13	578.649	0.13	1242.36	0.13	711.847	0.13	1255.54	0.13	546.008	0.13	1250.36	0.13	579.463	0.13	1419.14	0.13	487.737
0.195	1132.88	0.195	627.26	0.195	1633.7	0.195	474.745	0.195	2206.53	0.195	657.834	0.195	1398.38	0.195	493.36	0.195	1509.42	0.195	476.185	0.195	1003.84	0.195	593.151	0.195	1327.48	0.195	726.487	0.195	1361.72	0.195	539.843	0.195	1261.84	0.195	604.052	0.195	1577.09	0.195	506.014
0.26	1176.92	0.26	606.143	0.26	1686.55	0.26	501.958	0.26	2373.87	0.26	761.126	0.26	1562.62	0.26	507.766	0.26	1783.94	0.26	573.49	0.26	1023.97	0.26	612.828	0.26	1463.06	0.26	734.649	0.26	1451.89	0.26	542.238	0.26	1278.22	0.26	620.537	0.26	1762.31	0.26	499.811
0.325	1170.19	0.325	583.458	0.325	1817.66	0.325	536.295	0.325	2568.13	0.325	920.582	0.325	1765.38	0.325	504.856	0.325	1892.71	0.325	767.403	0.325	1029.44	0.325	654.369	0.325	1614.63	0.325	779.33	0.325	1591.73	0.325	586.804	0.325	1321.24	0.325	709.773	0.325	1998.63	0.325	547.271
0.39	1185.62	0.39	601.615	0.39	1929.77	0.39	609.517	0.39	2589.87	0.39	1139.01	0.39	1874.97	0.39	556.376	0.39	1891.26	0.39	1078.24	0.39	1062.96	0.39	802.425	0.39	1885.12	0.39	835.182	0.39	1757.84	0.39	666.927	0.39	1287.28	0.39	868.82	0.39	2202.25	0.39	620.72
0.455	1259.03	0.455	640.809	0.455	2096.67	0.455	744.325	0.455	2560.99	0.455	1199.93	0.455	1999.41	0.455	691.6	0.455	1751.79	0.455	1426.47	0.455	1051.06	0.455	999.571	0.455	2179.39	0.455	873.348	0.455	1951.92	0.455	781.395	0.455	1312.26	0.455	1132.69	0.455	2384.95	0.455	743.95
0.52	1367.06	0.52	726.365	0.52	2235.24	0.52	952.345	0.52	2441.81	0.52	1122.44	0.52	1984.65	0.52	880.125	0.52	1527.6	0.52	1567.72	0.52	1105.37	0.52	1235.82	0.52	2491.86	0.52	893.203	0.52	2129.12	0.52	918.785	0.52	1320.99	0.52	1593.11	0.52	2504.11	0.52	908.678
0.585	1465.13	0.585	794.087	0.585	2374.86	0.585	1271.13	0.585	2153.78	0.585	949.842	0.585	1832.25	0.585	1036.88	0.585	1341.35	0.585	1348.3	0.585	1187.29	0.585	1494.25	0.585	2674.51	0.585	920.131	0.585	2256.92	0.585	1011.9	0.585	1404.71	0.585	2043.74	0.585	2493.26	0.585	1035.05
0.65	1537.09	0.65	883.408	0.65	2502.06	0.65	1573.43	0.65	2034.65	0.65	753.296	0.65	1663.21	0.65	1087.3	0.65	1176.28	0.65	1072.32	0.65	1241.48	0.65	1624.77	0.65	2882.98	0.65	998.573	0.65	2208.4	0.65	966.347	0.65	1481.13	0.65	2305.32	0.65	2429.74	0.65	1069.22
0.715	1684.75	0.715	1000.84	0.715	2624.57	0.715	1823.56	0.715	1878.38	0.715	631.878	0.715	1418.15	0.715	1005.71	0.715	1045.16	0.715	892.399	0.715	1305.91	0.715	1674.82	0.715	3007.3	0.715	1019.38	0.715	2071.58	0.715	851.786	0.715	1608.11	0.715	2111.6	0.715	2302.37	0.715	945.427
0.78	1808.31	0.78	1162.5	0.78	2670.97	0.78	1776.52	0.78	1777.45	0.78	573.245	0.78	1286.4	0.78	832.79	0.78	973.975	0.78	812.173	0.78	1431.27	0.78	1672.18	0.78	2963.27	0.78	1083.58	0.78	1823.04	0.78	668.411	0.78	1648.21	0.78	1601.01	0.78	2114.06	0.78	734.879
0.845	1977.03	0.845	1310.26	0.845	2719.28	0.845	1434.03	0.845	1615.97	0.845	572.227	0.845	1179.84	0.845	659.968	0.845	919.55	0.845	667.116	0.845	1621.65	0.845	1503.76	0.845	2801.57	0.845	1055.59	0.845	1649.55	0.845	555.88	0.845	1707.87	0.845	1154.39	0.845	1929.77	0.845	621.381
0.91	2097.18	0.91	1378.62	0.91	2781.86	0.91	1055.59	0.91	1457.65	0.91	547.888	0.91	1117.4	0.91	565.943	0.91	893.912	0.91	536.686	0.91	1875.58	0.91	1201.25	0.91	2650.77	0.91	987.493	0.91	1540.79	0.91	522.183	0.91	1645.81	0.91	827.735	0.91	1687.59	0.91	585.628
0.975	2270.84	0.975	1388.45	0.975	2759.68	0.975	737.887	0.975	1303.54	0.975	521.693	0.975	1089.17	0.975	499.561	0.975	881.156	0.975	456.241	0.975	2066.22	0.975	954.029	0.975	2460.96	0.975	872.448	0.975	1462.12	0.975	497.331	0.975	1496.66	0.975	661.931	0.975	1421.73	0.975	536.429
1.04	2364.39	1.04	1349.43	1.04	2707.38	1.04	576.162	1.04	1235.45	1.04	505.621	1.04	1036.98	1.04	500.508	1.04	852.608	1.04	436.65	1.04	2107.32	1.04	699.169	1.04	2314.15	1.04	792.725	1.04	1436.14	1.04	501.902	1.04	1339.02	1.04	552.889	1.04	1244.2	1.04	554.379
1.105	2362.2	1.105	1268.7	1.105	2429.76	1.105	499.1	1.105	1112.72	1.105	499.63	1.105	1040.56	1.105	495.166	1.105	817.886	1.105	429.214	1.105	2042.03	1.105	580.21	1.105	2241.16	1.105	707.906	1.105	1370.43	1.105	466.373	1.105	1231.64	1.105	529.6	1.105	1126.66	1.105	596.004
1.17	2364.49	1.17	1204.91	1.17	2155.03	1.17	445.586	1.17	1081.83	1.17	484.689					1.17	807.892	1.17	422.589	1.17	1863.54	1.17	533.12	1.17	2161.27	1.17	625.64	1.17	1340.73	1.17	447.994	1.17	1141.14	1.17	525.368	1.17	1029.42	1.17	655.796
1.235	2289.29	1.235	1133.55	1.235	1819.45	1.235	433.558	1.235	1071.77	1.235	488.741					1.235	785.893	1.235	431.083	1.235	1634.51	1.235	484.82	1.235	2123.49	1.235	587.324	1.235	1301.66	1.235	469.59	1.235	1048.47	1.235	513.722	1.235	931.149	1.235	683.441
1.3	2108.61	1.3	1001.08	1.3	1439.86	1.3	413.958													1.3	1439.57	1.3	469.44	1.3	2070.28	1.3	551.496	1.3	1309.4	1.3	458.112	1.3	1030.49	1.3	541.543	1.3	928.795	1.3	627.221
1.365	1987.73	1.365	891.343	1.365	1209.48	1.365	420.342													1.365	1312.13	1.365	462.704	1.365	2078.01	1.365	501.806	1.365	1292.49	1.365	465.118	1.365	1026.95	1.365	546.015	1.365	879.592	1.365	563.003
1.43	1849.31	1.43	770.855	1.43	1075.52	1.43	418.789													1.43	1191.85	1.43	435.538	1.43	1945.6	1.43	514.914	1.43	1259.82	1.43	490.603	1.43	974.575	1.43	562.936	1.43	829.558	1.43	523.469
1.495	1731.18	1.495	700.917	1.495	999.175	1.495	424.843													1.495	1129.79	1.495	468.155	1.495	1870.19	1.495	515.787					1.495	981.268	1.495	543.472	1.495	817.307	1.495	489.757
1.56	1609.18	1.56	640.971	1.56	950.171	1.56	408.054													1.56	1063.83	1.56	461.665	1.56	1661.66	1.56	530.211					1.56	954.94	1.56	506.747
1.625	1463.77	1.625	595.219	1.625	869.993	1.625	400.391													1.625	1006.94	1.625	442.649	1.625	1539.08	1.625	519.945
1.69	1401.33	1.69	520.532	1.69	875.282	1.69	415.747																	1.69	1439.01	1.69	539.029
1.755	1310.93	1.755	512.345	1.755	868.549	1.755	408.801																	1.755	1381.27	1.755	548.142
1.82	1265.98	1.82	518.165	1.82	847.699	1.82	424.681																	1.82	1297.95	1.82	547.665
1.885	1190.32	1.885	508.816
1.95	1139.49	1.95	473.298
2.015	1117.92	2.015	477.187
2.08	1098.17	2.08	472.985
4dpf4_mem-1				4dpf4_mem-2				4dpf4_mem-3				4dpf4_mem-4				4dpf4_mem-5				4dpf4_mem-6				4dpf4_mem-7				4dpf4_mem-8				4dpf4_mem-9				4dpf4_mem-10
Distance	mScarlet	Distance	Sema7A	Distance	mScarlet	Distance	Sema7A	Distance	mScarlet	Distance	Sema7A	Distance	mScarlet	Distance	Sema7A	Distance	mScarlet	Distance	Sema7A	Distance	mScarlet	Distance	Sema7A	Distance	mScarlet	Distance	Sema7A	Distance	mScarlet	Distance	Sema7A	Distance	mScarlet	Distance	Sema7A	Distance	mScarlet	Distance	Sema7A
0	1017.02	0	776.388	0	1668.04	0	674.973	0	750.866	0	741.574	0	767.71	0	521.873	0	914.309	0	783.027	0	1269.37	0	692.702	0	1004.83	0	777.566	0	828.818	0	591.864	0	949.146	0	727.828	0	927.725	0	688.914
0.065	1073.87	0.065	758.594	0.065	1687.4	0.065	729.771	0.065	769.329	0.065	696.108	0.065	791.092	0.065	538.268	0.065	949.97	0.065	754.942	0.065	1237.07	0.065	720.458	0.065	996.848	0.065	776.069	0.065	806.306	0.065	586.003	0.065	949.84	0.065	751.449	0.065	956.307	0.065	675.189
0.13	1108.57	0.13	866.122	0.13	1662.31	0.13	709.605	0.13	776.412	0.13	633.245	0.13	798.497	0.13	545.982	0.13	975.263	0.13	758.996	0.13	1270.97	0.13	736.955	0.13	1052.35	0.13	805.428	0.13	788.052	0.13	588.984	0.13	910.434	0.13	728.917	0.13	1012.48	0.13	698.227
0.195	1141.51	0.195	920.857	0.195	1699.97	0.195	743.667	0.195	779.656	0.195	661.917	0.195	837.413	0.195	581.739	0.195	1025.39	0.195	744.286	0.195	1243.25	0.195	757.83	0.195	1060.44	0.195	836.076	0.195	800.359	0.195	614.607	0.195	940.978	0.195	746.861	0.195	1011.48	0.195	706.909
0.26	1212.6	0.26	1036.87	0.26	1724.79	0.26	836.187	0.26	817.795	0.26	738.103	0.26	862.846	0.26	656.466	0.26	1208.05	0.26	792.193	0.26	1302.13	0.26	775.638	0.26	1080.78	0.26	871.362	0.26	815.451	0.26	620.21	0.26	984.748	0.26	782.704	0.26	1111.16	0.26	710.673
0.325	1266.36	0.325	1196.33	0.325	1711.17	0.325	1052.78	0.325	892.472	0.325	853.107	0.325	886.535	0.325	817.995	0.325	1391.79	0.325	855.846	0.325	1295.24	0.325	817.91	0.325	1141.43	0.325	933.432	0.325	792.743	0.325	620.627	0.325	967.602	0.325	860.049	0.325	1236.27	0.325	729.207
0.39	1320.08	0.39	1253.61	0.39	1762.62	0.39	1484.52	0.39	949.377	0.39	1010.37	0.39	913.661	0.39	1031.63	0.39	1495.23	0.39	943.141	0.39	1308.28	0.39	835.901	0.39	1192	0.39	1026.62	0.39	797.352	0.39	580.397	0.39	947.123	0.39	931.119	0.39	1461.12	0.39	728.374
0.455	1451.88	0.455	1378.2	0.455	1793.93	0.455	2172.22	0.455	1103.18	0.455	1411.59	0.455	1020.04	0.455	1377.78	0.455	1578.92	0.455	1116.24	0.455	1331.23	0.455	892.101	0.455	1211.55	0.455	1220.43	0.455	802.584	0.455	584.876	0.455	1014.76	0.455	1004.08	0.455	1662.21	0.455	732.485
0.52	1490.17	0.52	1503.1	0.52	1790.14	0.52	2798.8	0.52	1193.86	0.52	1834.33	0.52	1099.98	0.52	1655.83	0.52	1578.66	0.52	1496.51	0.52	1365.5	0.52	1050.73	0.52	1319.71	0.52	1430.03	0.52	814.387	0.52	611.036	0.52	1026.12	0.52	1162.62	0.52	1928.33	0.52	754.872
0.585	1554.1	0.585	1545.89	0.585	1750.3	0.585	3119.42	0.585	1248.51	0.585	1905.76	0.585	1090.6	0.585	1804.37	0.585	1461.12	0.585	1946.84	0.585	1378.4	0.585	1448.28	0.585	1445.33	0.585	1584.7	0.585	798.24	0.585	635.873	0.585	1041.71	0.585	1297.6	0.585	2210.62	0.585	791.081
0.65	1546.79	0.65	1449.21	0.65	1749.82	0.65	2700.68	0.65	1203.62	0.65	1669.3	0.65	1053.95	0.65	1761.86	0.65	1362.47	0.65	2225.85	0.65	1349.57	0.65	1905.2	0.65	1667.9	0.65	1739.95	0.65	841.148	0.65	727.469	0.65	1066.01	0.65	1487.59	0.65	2374.06	0.65	902.688
0.715	1458.89	0.715	1224.19	0.715	1693.16	0.715	1947.89	0.715	1092.35	0.715	1184.89	0.715	1008.91	0.715	1571.04	0.715	1224.57	0.715	2055.36	0.715	1336.17	0.715	2224.58	0.715	1802.56	0.715	1708.64	0.715	881.87	0.715	993.034	0.715	1068.16	0.715	1599.62	0.715	2467.68	0.715	1194.38
0.78	1364.75	0.78	1059.4	0.78	1619.78	0.78	1324.1	0.78	945.299	0.78	874.313	0.78	913.681	0.78	1302.33	0.78	1125.74	0.78	1663.01	0.78	1336.39	0.78	2247.83	0.78	1921.05	0.78	1495.27	0.78	902.879	0.78	1393.35	0.78	1083.65	0.78	1736.31	0.78	2534.84	0.78	1655.76
0.845	1243.95	0.845	921.681	0.845	1488.42	0.845	923.679	0.845	869.391	0.845	705.152	0.845	844.752	0.845	1082.37	0.845	1113.62	0.845	1267.3	0.845	1316.99	0.845	1943.57	0.845	1838.67	0.845	1205.17	0.845	981.349	0.845	1819.8	0.845	1140.97	0.845	1789.81	0.845	2492.15	0.845	2122.34
0.91	1156.19	0.91	852.236	0.91	1334.47	0.91	695.031	0.91	769.685	0.91	632.341	0.91	798.379	0.91	916.422	0.91	1110.82	0.91	1075.86	0.91	1348.98	0.91	1488.7	0.91	1693.09	0.91	975.361	0.91	1021.61	0.91	2003.4	0.91	1144.93	0.91	1679.56	0.91	2397.59	0.91	2477.22
0.975	1106.49	0.975	821.738	0.975	1227.84	0.975	623.856	0.975	751.504	0.975	598.87	0.975	764.545	0.975	850.581	0.975	1123.28	0.975	943.121	0.975	1286.45	0.975	1118.09	0.975	1433.55	0.975	889.806	0.975	1136.66	0.975	1711.38	0.975	1164.55	0.975	1509.73	0.975	2275.09	0.975	2474.25
1.04	1085.52	1.04	820.971	1.04	1067.98	1.04	598.638	1.04	727.839	1.04	576.736	1.04	770.135	1.04	823.841	1.04	1163.32	1.04	867.303	1.04	1276.82	1.04	932.065	1.04	1234.44	1.04	834.695	1.04	1219.22	1.04	1306.25	1.04	1137.67	1.04	1353.11	1.04	2105.68	1.04	2222.02
1.105	1056.17	1.105	817.8	1.105	1008.68	1.105	591.076	1.105	722.361	1.105	578.46	1.105	725.66	1.105	794.488	1.105	1223.11	1.105	807.759	1.105	1248.88	1.105	839.336	1.105	1172.35	1.105	817.572	1.105	1272.72	1.105	992.015	1.105	1079.2	1.105	1153.66	1.105	1891.35	1.105	1838.25
1.17	1037.32	1.17	795.953	1.17	961.968	1.17	573.376	1.17	735.499	1.17	569.295	1.17	725.291	1.17	768.118	1.17	1295.86	1.17	794.832	1.17	1193.52	1.17	815.095	1.17	1071.76	1.17	777.955	1.17	1200.71	1.17	826.675	1.17	1011.01	1.17	988.34	1.17	1659.59	1.17	1420.94
1.235	1008.05	1.235	786.921	1.235	946.511	1.235	591.364	1.235	724.263	1.235	579.723	1.235	723.705	1.235	699.068					1.235	1178.17	1.235	778.712	1.235	1045.25	1.235	729.478	1.235	1091.44	1.235	701.796	1.235	976.064	1.235	867.416	1.235	1477.52	1.235	1096.83
				1.3	876.79	1.3	608.288	1.3	702.917	1.3	568.297	1.3	714.86	1.3	628.715					1.3	1138.81	1.3	721.845	1.3	986.435	1.3	730.095	1.3	974.714	1.3	627.674	1.3	960.126	1.3	801.939	1.3	1274.53	1.3	869.852
												1.365	695.442	1.365	571.781					1.365	1085.65	1.365	706.163	1.365	970.06	1.365	683.477	1.365	887.24	1.365	578.352	1.365	938.423	1.365	749.58	1.365	1143.4	1.365	733.855
												1.43	681.185	1.43	542.616					1.43	1102.7	1.43	702.239	1.43	949.653	1.43	662.049	1.43	855.613	1.43	578.121	1.43	915.771	1.43	721.509	1.43	1021.87	1.43	700.962
																				1.495	1070.64	1.495	696.859					1.495	812.173	1.495	554.882	1.495	925.747	1.495	722.327	1.495	984.929	1.495	651.848
																				1.56	1048.91	1.56	704.449					1.56	785.803	1.56	549.801	1.56	903.143	1.56	702.76	1.56	940.455	1.56	626.786
																				1.625	1017.02	1.625	704.963					1.625	777.047	1.625	551.708	1.625	885.391	1.625	675.764	1.625	900.933	1.625	660.309
																				1.69	957.147	1.69	701.976									1.69	878.513	1.69	686.344	1.69	879.491	1.69	678.394
																																				1.755	839.872	1.755	680.251
																																				1.82	873.845	1.82	674.492
4dpf5_mem-1				4dpf5_mem-2				4dpf5_mem-3				4dpf5_mem-4				4dpf5_mem-5				4dpf5_mem-6				4dpf5_mem-7				4dpf5_mem-8				4dpf5_mem-9				4dpf5_mem-10
Distance	mScarlet	Distance	Sema7A	Distance	mScarlet	Distance	Sema7A	Distance	mScarlet	Distance	Sema7A	Distance	mScarlet	Distance	Sema7A	Distance	mScarlet	Distance	Sema7A	Distance	mScarlet	Distance	Sema7A	Distance	mScarlet	Distance	Sema7A	Distance	mScarlet	Distance	Sema7A	Distance	mScarlet	Distance	Sema7A	Distance	mScarlet	Distance	Sema7A
0	841.203	0	1253.91	0	761.27	0	754.901	0	887.114	0	597.345	0	1116.25	0	736.081	0	1157.89	0	817.963	0	816.611	0	687.467	0	1056.03	0	576.15	0	819.243	0	744.697	0	919.508	0	713.042	0	727.203	0	877.34
0.065	834.892	0.065	1220.86	0.065	789.566	0.065	795.722	0.065	969.524	0.065	563.406	0.065	1167.82	0.065	791.923	0.065	1294.62	0.065	748.46	0.065	848.052	0.065	715.77	0.065	1083.74	0.065	566.025	0.065	863.268	0.065	769.951	0.065	937.426	0.065	711.733	0.065	727.225	0.065	909.861
0.13	825.079	0.13	1264.1	0.13	822.241	0.13	822.929	0.13	1071.14	0.13	555.048	0.13	1198.53	0.13	818.613	0.13	1356.49	0.13	731.911	0.13	844.296	0.13	690.632	0.13	1129.24	0.13	559.065	0.13	868.573	0.13	829.244	0.13	988.245	0.13	711.461	0.13	739.475	0.13	938.144
0.195	866.7	0.195	1329.79	0.195	835.574	0.195	839.923	0.195	1194.41	0.195	594.615	0.195	1244.05	0.195	868.564	0.195	1410.78	0.195	728.514	0.195	853.467	0.195	672.366	0.195	1203.02	0.195	573.707	0.195	900.179	0.195	896.774	0.195	1012.65	0.195	735.672	0.195	728.836	0.195	1044.83
0.26	883.205	0.26	1498.81	0.26	874.091	0.26	863.02	0.26	1324	0.26	583.399	0.26	1377.72	0.26	920.854	0.26	1492.81	0.26	741.121	0.26	919.453	0.26	681.158	0.26	1231.84	0.26	600.832	0.26	910.948	0.26	1015.16	0.26	1047.81	0.26	743.143	0.26	754.864	0.26	1084.88
0.325	876.795	0.325	1647.93	0.325	914.766	0.325	901.092	0.325	1517.42	0.325	595.775	0.325	1519.95	0.325	929.161	0.325	1528.08	0.325	786.599	0.325	993.479	0.325	683.13	0.325	1270.14	0.325	605.654	0.325	927.344	0.325	1142.16	0.325	1073.63	0.325	770.779	0.325	759.538	0.325	1180.19
0.39	927.184	0.39	1797.77	0.39	978.423	0.39	969.281	0.39	1718.09	0.39	610.876	0.39	1671.99	0.39	987.999	0.39	1631.75	0.39	879.753	0.39	1025.19	0.39	704.139	0.39	1349.73	0.39	651.952	0.39	965.951	0.39	1297.74	0.39	1111.72	0.39	808.309	0.39	784.26	0.39	1251.56
0.455	994.922	0.455	1938.67	0.455	1014.01	0.455	1034.33	0.455	1867.47	0.455	629.164	0.455	1807.99	0.455	1223.81	0.455	1637.61	0.455	1080.02	0.455	1062.86	0.455	757.972	0.455	1403.62	0.455	730.892	0.455	1022.43	0.455	1428.61	0.455	1189.68	0.455	896.887	0.455	777.283	0.455	1260.44
0.52	1050.38	0.52	1967.6	0.52	1053.72	0.52	1204.02	0.52	1949.74	0.52	679.896	0.52	1877.96	0.52	1550.78	0.52	1622.95	0.52	1302.89	0.52	1066.88	0.52	886.176	0.52	1403.96	0.52	873.495	0.52	1050.82	0.52	1499.04	0.52	1277.07	0.52	1113.7	0.52	808.159	0.52	1323.05
0.585	1181.3	0.585	1968.73	0.585	1169.07	0.585	1437.29	0.585	1975.43	0.585	786.764	0.585	1939.15	0.585	1900.8	0.585	1574.85	0.585	1500.59	0.585	1080.12	0.585	1134.78	0.585	1425.82	0.585	1114.08	0.585	1137.74	0.585	1624.69	0.585	1339.4	0.585	1599.1	0.585	827.798	0.585	1358.57
0.65	1280.31	0.65	1926.9	0.65	1317.32	0.65	1898.56	0.65	1879.64	0.65	985.307	0.65	1919.53	0.65	1928.28	0.65	1445.49	0.65	1567.89	0.65	1084.73	0.65	1523.48	0.65	1468.87	0.65	1461.2	0.65	1243.48	0.65	1795.08	0.65	1438.58	0.65	2355.45	0.65	871.615	0.65	1432.12
0.715	1308.2	0.715	1843.81	0.715	1421.51	0.715	2555.51	0.715	1769.06	0.715	1248.56	0.715	1748.93	0.715	1650.27	0.715	1318.14	0.715	1404.55	0.715	1149.33	0.715	2125.14	0.715	1481.54	0.715	1845.02	0.715	1334.04	0.715	1983.51	0.715	1562.43	0.715	3274.51	0.715	890.397	0.715	1568.97
0.78	1272.39	0.78	1613.87	0.78	1519.88	0.78	3305.4	0.78	1696.93	0.78	1442.14	0.78	1617.01	0.78	1327.77	0.78	1194.33	0.78	1152.77	0.78	1158.49	0.78	2824.54	0.78	1520.48	0.78	2060.81	0.78	1433.91	0.78	2246.13	0.78	1642.64	0.78	3835.95	0.78	951.401	0.78	1631.97
0.845	1181.88	0.845	1256.57	0.845	1465.5	0.845	3712.72	0.845	1601.82	0.845	1309.99	0.845	1532.62	0.845	1069.33	0.845	1089.82	0.845	953.398	0.845	1217.45	0.845	3415.6	0.845	1501.35	0.845	1961.75	0.845	1563.66	0.845	2493.38	0.845	1697.64	0.845	3634.88	0.845	1005.09	0.845	1725.01
0.91	1067.17	0.91	980.844	0.91	1390.73	0.91	3424.73	0.91	1528	0.91	1092.62	0.91	1439.71	0.91	920.864	0.91	1000.46	0.91	816.737	0.91	1304.26	0.91	3667.26	0.91	1483.48	0.91	1662.74	0.91	1658.34	0.91	2704.78	0.91	1737.24	0.91	3010.15	0.91	1079.03	0.91	1890.86
0.975	968.632	0.975	798.441	0.975	1327.09	0.975	2751.01	0.975	1467.54	0.975	858.746	0.975	1341.43	0.975	851.121	0.975	912.598	0.975	739.087	0.975	1378.3	0.975	3336.06	0.975	1416.23	0.975	1260.75	0.975	1764.29	0.975	2857.38	0.975	1699.1	0.975	2219.34	0.975	1160.65	0.975	2035.81
1.04	876.409	1.04	697.113	1.04	1216.51	1.04	1951.93	1.04	1389.72	1.04	704.369	1.04	1197.89	1.04	860.774	1.04	879.996	1.04	698.913	1.04	1495.35	1.04	2715.83	1.04	1301.45	1.04	966.755	1.04	1751.12	1.04	2794.52	1.04	1611.41	1.04	1537.14	1.04	1285.45	1.04	2253.95
1.105	831.833	1.105	606.856	1.105	1149.86	1.105	1349.1	1.105	1263.29	1.105	617.612	1.105	1112.43	1.105	855.088	1.105	860.83	1.105	682.382	1.105	1512.28	1.105	2117.5	1.105	1164.18	1.105	770.947	1.105	1724.96	1.105	2553.85	1.105	1409.35	1.105	1123.1	1.105	1386.66	1.105	2481.97
1.17	799.332	1.17	589.925	1.17	1155.68	1.17	980.458	1.17	1236.58	1.17	584.423	1.17	1006.26	1.17	829.562	1.17	833.978	1.17	682.954	1.17	1527.6	1.17	1530.19	1.17	1077.8	1.17	682.768	1.17	1613.49	1.17	2195.29	1.17	1252.73	1.17	848.425	1.17	1510.02	1.17	2559.89
1.235	806.125	1.235	582.209	1.235	1198.9	1.235	793.078	1.235	1150.07	1.235	582.599									1.235	1400.16	1.235	1134.42	1.235	1001.55	1.235	624.731	1.235	1451.17	1.235	1803.9	1.235	1109.5	1.235	747.868	1.235	1505.43	1.235	2428.96
1.3	779.015	1.3	565.328	1.3	1169.11	1.3	705.631	1.3	1053.21	1.3	597.569									1.3	1295.96	1.3	885.184	1.3	978.14	1.3	630.24	1.3	1253.9	1.3	1373.42	1.3	1033.23	1.3	652.928	1.3	1530.8	1.3	1887.08
1.365	798.366	1.365	564.175	1.365	1202.91	1.365	683.085	1.365	994.802	1.365	603.409									1.365	1155.64	1.365	791.449	1.365	928.177	1.365	626.131	1.365	1114.89	1.365	1043.68	1.365	973.861	1.365	665.067	1.365	1433.35	1.365	1365.08
1.43	800.02	1.43	540.234	1.43	1225.49	1.43	640.335	1.43	953.923	1.43	598.604									1.43	1066.91	1.43	719.062					1.43	1014.89	1.43	830.411	1.43	892.398	1.43	690.949	1.43	1380.09	1.43	998.421
1.495	798.57	1.495	547.759	1.495	1247.85	1.495	681.902	1.495	855.009	1.495	609.637									1.495	971.884	1.495	651.424					1.495	896.999	1.495	703.393	1.495	902.072	1.495	753.947	1.495	1325.46	1.495	782.544
				1.56	1193.16	1.56	685.462	1.56	838.813	1.56	662.93									1.56	864.281	1.56	607.311					1.56	839.066	1.56	635.853	1.56	867.608	1.56	744.714	1.56	1196.16	1.56	708.239
				1.625	1230.83	1.625	692.435													1.625	796.036	1.625	625.797					1.625	774.395	1.625	595.028	1.625	863.274	1.625	701.66	1.625	1107.9	1.625	667.453
																				1.69	762.591	1.69	665.114					1.69	755.013	1.69	596.16	1.69	847.58	1.69	740.968	1.69	1034.93	1.69	633.831
																				1.755	795.574	1.755	623.615					1.755	741.991	1.755	597.63					1.755	979.732	1.755	638.792
																				1.82	742.527	1.82	607.284					1.82	731.596	1.82	580.504					1.82	949.641	1.82	629.721
																				1.885	747.11	1.885	609.263					1.885	713.04	1.885	588.444					1.885	913.948	1.885	628.492
																												1.95	721.37	1.95	587.345					1.95	931.31	1.95	647.162
																																				2.015	920.118	2.015	649.822
																																				2.08	912.567	2.08	653.542
																																				2.145	937.432	2.145	656.518
4dpf6_mem-1				4dpf6_mem-2				4dpf6_mem-3				4dpf6_mem-4				4dpf6_mem-5				4dpf6_mem-6				4dpf6_mem-7				4dpf6_mem-8				4dpf6_mem-9				4dpf6_mem-10
Distance	mScarlet	Distance	Sema7A	Distance	mScarlet	Distance	Sema7A	Distance	mScarlet	Distance	Sema7A	Distance	mScarlet	Distance	Sema7A	Distance	mScarlet	Distance	Sema7A	Distance	mScarlet	Distance	Sema7A	Distance	mScarlet	Distance	Sema7A	Distance	mScarlet	Distance	Sema7A	Distance	mScarlet	Distance	Sema7A	Distance	mScarlet	Distance	Sema7A
0	761.65	0	643.297	0	773.762	0	526.281	0	668.658	0	614.511	0	477.436	0	454.231	0	598.686	0	561.416	0	761.997	0	523.419	0	849.512	0	565.729	0	661.841	0	531.278	0	681.275	0	634.763	0	598.736	0	584.064
0.065	758.223	0.065	608.175	0.065	769.281	0.065	532.232	0.065	678.981	0.065	586.965	0.065	473.398	0.065	459.591	0.065	593.449	0.065	568.925	0.065	739.039	0.065	537.364	0.065	832.421	0.065	592.865	0.065	681.715	0.065	517.046	0.065	671.968	0.065	633.185	0.065	606.044	0.065	583.095
0.13	766.353	0.13	608.006	0.13	759.451	0.13	548.207	0.13	685.877	0.13	593.616	0.13	472.551	0.13	451.812	0.13	600.093	0.13	539.923	0.13	783.878	0.13	518.27	0.13	799.984	0.13	648.364	0.13	689.302	0.13	535.735	0.13	704.246	0.13	627.569	0.13	598.738	0.13	557.664
0.195	764.364	0.195	594.065	0.195	790.269	0.195	524.683	0.195	710.742	0.195	609.398	0.195	500.885	0.195	446.265	0.195	605.308	0.195	525.036	0.195	817.455	0.195	496.644	0.195	848.607	0.195	686.902	0.195	686.083	0.195	554.536	0.195	735.801	0.195	639.276	0.195	605.758	0.195	556.694
0.26	754.359	0.26	604.335	0.26	787.064	0.26	539.07	0.26	714.618	0.26	639.48	0.26	495.961	0.26	437.285	0.26	617.006	0.26	513.916	0.26	911.223	0.26	496.617	0.26	871.639	0.26	748.878	0.26	678.04	0.26	597.106	0.26	754.136	0.26	642.71	0.26	634.106	0.26	555.732
0.325	799.346	0.325	632.028	0.325	787.001	0.325	582.838	0.325	732.328	0.325	733.154	0.325	522.402	0.325	443.651	0.325	610.197	0.325	487.02	0.325	984.261	0.325	504.955	0.325	866.714	0.325	812.817	0.325	675.795	0.325	604.198	0.325	801.794	0.325	672.087	0.325	648.684	0.325	575.58
0.39	861.417	0.39	692.763	0.39	802.13	0.39	651.349	0.39	760.703	0.39	910.637	0.39	580.378	0.39	496.048	0.39	624.96	0.39	493.332	0.39	1043.69	0.39	512.474	0.39	871.03	0.39	931.65	0.39	665.255	0.39	650.792	0.39	803.366	0.39	676.439	0.39	652.02	0.39	597.525
0.455	858.502	0.455	870.697	0.455	830.842	0.455	813.397	0.455	821.574	0.455	1175.18	0.455	680.409	0.455	508.989	0.455	649.053	0.455	541.134	0.455	1129.64	0.455	505.765	0.455	909.142	0.455	1052.03	0.455	665.16	0.455	693.232	0.455	859.892	0.455	655.028	0.455	672.703	0.455	629.939
0.52	892.19	0.52	1112.11	0.52	894.309	0.52	1020.71	0.52	825.398	0.52	1478.37	0.52	836.31	0.52	618.016	0.52	721.019	0.52	580.913	0.52	1213.24	0.52	520.469	0.52	912.099	0.52	1067.71	0.52	686.426	0.52	724.655	0.52	901.635	0.52	652.012	0.52	728.98	0.52	657.572
0.585	980.043	0.585	1345.49	0.585	981.343	0.585	1347.8	0.585	811.27	0.585	1655.82	0.585	1006.78	0.585	757.051	0.585	766.348	0.585	683.561	0.585	1306.75	0.585	545.898	0.585	960.935	0.585	1130.4	0.585	677.809	0.585	787.974	0.585	931.188	0.585	628.887	0.585	733.738	0.585	679.83
0.65	1031.21	0.65	1382.9	0.65	1078.7	0.65	1582.39	0.65	818.332	0.65	1662.54	0.65	1162.41	0.65	863.392	0.65	851.343	0.65	900.021	0.65	1418.64	0.65	583.811	0.65	905.308	0.65	1120.81	0.65	680.791	0.65	786.377	0.65	953.366	0.65	649.212	0.65	740.867	0.65	711.187
0.715	1089.6	0.715	1272.91	0.715	1148.85	0.715	1701.64	0.715	793.791	0.715	1395.81	0.715	1171.41	0.715	871.944	0.715	872.657	0.715	1216.84	0.715	1510.41	0.715	696.001	0.715	870.766	0.715	983.937	0.715	705.401	0.715	880.073	0.715	982.426	0.715	641.407	0.715	751.654	0.715	744.699
0.78	1065.66	0.78	1106.79	0.78	1298.07	0.78	1586.12	0.78	755.432	0.78	1102.67	0.78	1216.38	0.78	758.468	0.78	894.037	0.78	1490.91	0.78	1506.24	0.78	853.913	0.78	831.89	0.78	842.056	0.78	726.334	0.78	1068.06	0.78	1014.01	0.78	644.999	0.78	758.195	0.78	830.418
0.845	972.279	0.845	944.669	0.845	1469.7	0.845	1323.62	0.845	695.85	0.845	850.824	0.845	1104.2	0.845	628.371	0.845	895.085	0.845	1640.99	0.845	1519.54	0.845	1133.73	0.845	801.799	0.845	697.28	0.845	757.452	0.845	1315.06	0.845	1043.48	0.845	643.45	0.845	802.021	0.845	908.847
0.91	891.734	0.91	875.935	0.91	1538.49	0.91	1035.22	0.91	639.348	0.91	714.813	0.91	1017.11	0.91	529.114	0.91	836.178	0.91	1557.83	0.91	1487.2	0.91	1389.45	0.91	710.465	0.91	611.106	0.91	787.558	0.91	1533.19	0.91	1071.62	0.91	620.927	0.91	841.108	0.91	988.724
0.975	821.709	0.975	820.227	0.975	1614.21	0.975	807.485	0.975	601.885	0.975	635.934	0.975	883.805	0.975	472.933	0.975	767.288	0.975	1277.23	0.975	1382.59	0.975	1456.4	0.975	686.378	0.975	561.642	0.975	785.835	0.975	1625.76	0.975	1119.31	0.975	673.813	0.975	868.779	0.975	1091.9
1.04	777.883	1.04	822.902	1.04	1589.48	1.04	679.059	1.04	602.601	1.04	601.57	1.04	749.265	1.04	430.109	1.04	725.72	1.04	1005.59	1.04	1264.49	1.04	1145.63	1.04	634.004	1.04	518.573	1.04	808.545	1.04	1488.1	1.04	1184.31	1.04	756.581	1.04	959.273	1.04	1136.47
1.105	750.547	1.105	782.22	1.105	1552.67	1.105	567.845	1.105	591.557	1.105	582.307	1.105	648.261	1.105	430.936	1.105	702.305	1.105	816.223	1.105	1221.96	1.105	865.168	1.105	595.469	1.105	493.438	1.105	763.632	1.105	1199.3	1.105	1235.42	1.105	855.602	1.105	1034.34	1.105	1111.52
1.17	728.035	1.17	717.117	1.17	1462.35	1.17	523.866	1.17	592.868	1.17	591.845	1.17	569.197	1.17	432.161	1.17	696.186	1.17	729.441	1.17	1105.62	1.17	676.35	1.17	562.424	1.17	492.382	1.17	715.886	1.17	889.209	1.17	1312.05	1.17	1139.97	1.17	1101.76	1.17	1105.08
1.235	719.101	1.235	672.435	1.235	1314.83	1.235	507.057	1.235	562.512	1.235	565.055	1.235	512.642	1.235	435.233	1.235	710.862	1.235	721.168	1.235	1046.69	1.235	609.674	1.235	566.909	1.235	497.803	1.235	632.308	1.235	665.304	1.235	1348.78	1.235	1640.7	1.235	1106.69	1.235	1072.82
1.3	702.183	1.3	643.231	1.3	1205.31	1.3	521.525	1.3	605.662	1.3	586.678	1.3	487.761	1.3	430.938	1.3	696.546	1.3	739.247	1.3	990.937	1.3	559.767	1.3	558.156	1.3	484.101	1.3	614.968	1.3	567.542	1.3	1373.55	1.3	2166.58	1.3	1155.7	1.3	994.818
1.365	699.88	1.365	600.668	1.365	1120.49	1.365	510.79	1.365	606.083	1.365	592.324	1.365	457.474	1.365	430.113	1.365	681.634	1.365	751.877	1.365	917.292	1.365	529.606	1.365	548.576	1.365	520.486	1.365	596.889	1.365	512.87	1.365	1372.58	1.365	2624	1.365	1152.63	1.365	967.492
1.43	670.788	1.43	586.489	1.43	1039.93	1.43	499.305	1.43	624.34	1.43	590.472	1.43	446.516	1.43	442.13	1.43	673.74	1.43	785.595	1.43	869.753	1.43	539.252	1.43	510.405	1.43	538.991	1.43	553.521	1.43	504.958	1.43	1357.96	1.43	2646.62	1.43	1110.15	1.43	950.741
1.495	651.5	1.495	560.058	1.495	964.229	1.495	507.74	1.495	627.298	1.495	596.691	1.495	432.367	1.495	449.194	1.495	660.117	1.495	785.346	1.495	825.43	1.495	514.56	1.495	519.118	1.495	532.707	1.495	537.333	1.495	482.261	1.495	1310.85	1.495	2327.37	1.495	1030.7	1.495	904.983
1.56	677.732	1.56	568.226	1.56	900.187	1.56	500.163	1.56	637.274	1.56	592.211					1.56	677.496	1.56	833.501	1.56	801.597	1.56	479.889					1.56	509.205	1.56	504.81	1.56	1237.79	1.56	1897.57	1.56	920.085	1.56	822.98
1.625	636.457	1.625	564.221	1.625	824.848	1.625	483.891									1.625	700.174	1.625	853.933	1.625	785.108	1.625	466.654					1.625	496.945	1.625	480.131	1.625	1204.49	1.625	1425.98	1.625	853.726	1.625	749.36
1.69	645.434	1.69	535.073	1.69	789.056	1.69	494.352													1.69	754.119	1.69	460.085					1.69	509.102	1.69	505.278	1.69	1215.25	1.69	1076.25	1.69	753.845	1.69	630.668
1.755	614.426	1.755	503.166	1.755	759.789	1.755	495.012													1.755	716.672	1.755	452.62					1.755	486.341	1.755	511.267	1.755	1183.52	1.755	908.503	1.755	681.155	1.755	565.065
1.82	634.467	1.82	516.339	1.82	762.671	1.82	508.109													1.82	685.481	1.82	458.247					1.82	478.352	1.82	541.156	1.82	1144.81	1.82	874.378	1.82	614.577	1.82	551.834
				1.885	715.792	1.885	505.436													1.885	668.864	1.885	460.195					1.885	487.234	1.885	504.192	1.885	1116.23	1.885	870.48	1.885	563.78	1.885	534.409
				1.95	692.166	1.95	505.816													1.95	653.782	1.95	452.878					1.95	484.983	1.95	491.546	1.95	1065.74	1.95	875.143	1.95	565.494	1.95	547.625
				2.015	670.088	2.015	525.052													2.015	667.369	2.015	459.835					2.015	475.039	2.015	488.706	2.015	1030.8	2.015	859.007	2.015	533.449	2.015	565.596
																				2.08	654.07	2.08	482.186									2.08	995.257	2.08	827.972	2.08	523.039	2.08	515.244
																				2.145	638.106	2.145	501.87									2.145	940.543	2.145	803.27	2.145	508.401	2.145	558.513
																				2.21	623.06	2.21	505.504									2.21	889.171	2.21	810.539	2.21	491.712	2.21	550.829
																																2.275	830.534	2.275	769.86	2.275	489.854	2.275	523.221
																																2.34	796.557	2.34	734.435	2.34	489.631	2.34	494.75
																																2.405	770.135	2.405	720.501	2.405	485.726	2.405	506.341
																																2.47	772.495	2.47	716.897	2.47	494.971	2.47	485.496
																																2.535	740.082	2.535	717.175	2.535	479.428	2.535	475.169
																																2.6	705.593	2.6	680.36	2.6	469.825	2.6	480.47
																																2.665	674.081	2.665	661.101
																																2.73	693.574	2.73	681.627
4dpf7_mem-1				4dpf7_mem-2				4dpf7_mem-3				4dpf7_mem-4				4dpf7_mem-5				4dpf7_mem-6				4dpf7_mem-7				4dpf7_mem-8				4dpf7_mem-9				4dpf7_mem-10
Distance	mScarlet	Distance	Sema7A	Distance	mScarlet	Distance	Sema7A	Distance	mScarlet	Distance	Sema7A	Distance	mScarlet	Distance	Sema7A	Distance	mScarlet	Distance	Sema7A	Distance	mScarlet	Distance	Sema7A	Distance	mScarlet	Distance	Sema7A	Distance	mScarlet	Distance	Sema7A	Distance	mScarlet	Distance	Sema7A	Distance	mScarlet	Distance	Sema7A
0	1052.98	0	881.316	0	1180.24	0	800.979	0	1022.51	0	669.532	0	1279.57	0	878.886	0	1008.32	0	685.109	0	889.687	0	639.14	0	1008.58	0	667.272	0	1163.5	0	1153.44	0	1357.97	0	891.13	0	1491.61	0	966.751
0.065	980.786	0.065	867.179	0.065	1211.27	0.065	790.7	0.065	1033.42	0.065	693.303	0.065	1324.42	0.065	868.875	0.065	1023.82	0.065	655.962	0.065	896.878	0.065	625.697	0.065	1018.41	0.065	697.042	0.065	1184.26	0.065	1158.48	0.065	1359.72	0.065	894.837	0.065	1651.72	0.065	1030.84
0.13	1035.81	0.13	841.294	0.13	1250.33	0.13	827.616	0.13	1034.74	0.13	709.444	0.13	1358.34	0.13	867.393	0.13	1020.48	0.13	668.742	0.13	923.013	0.13	687.414	0.13	1044.01	0.13	663.297	0.13	1221.14	0.13	1193.16	0.13	1385.37	0.13	873.96	0.13	1891.8	0.13	1050.03
0.195	1058.46	0.195	856.152	0.195	1249.85	0.195	940.601	0.195	1058.69	0.195	708.385	0.195	1347.91	0.195	866.28	0.195	996.222	0.195	660.222	0.195	940.181	0.195	676.494	0.195	1054.93	0.195	679.372	0.195	1213.94	0.195	1269.81	0.195	1392.02	0.195	904.619	0.195	2049.12	0.195	1200.8
0.26	1057.06	0.26	886.495	0.26	1341.95	0.26	1041.61	0.26	1096.24	0.26	725.087	0.26	1399.07	0.26	863.171	0.26	983.281	0.26	669.583	0.26	960.6	0.26	761.679	0.26	1173.68	0.26	678.095	0.26	1267.38	0.26	1391.08	0.26	1378.77	0.26	934.462	0.26	2238.76	0.26	1355.13
0.325	1094.35	0.325	920.829	0.325	1456.3	0.325	1179.63	0.325	1093.61	0.325	822.704	0.325	1408.9	0.325	851.75	0.325	988.932	0.325	696.324	0.325	949.46	0.325	761.38	0.325	1288.04	0.325	629.87	0.325	1323.39	0.325	1543.18	0.325	1464.94	0.325	1005.19	0.325	2346.11	0.325	1475.19
0.39	1112.58	0.39	899.044	0.39	1564.16	0.39	1310.97	0.39	1103.2	0.39	843.45	0.39	1461.98	0.39	940.157	0.39	1023.28	0.39	738.64	0.39	959.853	0.39	812.739	0.39	1469.88	0.39	634.34	0.39	1477.47	0.39	1762.18	0.39	1500.15	0.39	1167.4	0.39	2323.41	0.39	1672.75
0.455	1249.45	0.455	950.674	0.455	1704.56	0.455	1478.3	0.455	1160.82	0.455	840.436	0.455	1542.39	0.455	957.947	0.455	997.13	0.455	810.747	0.455	977.613	0.455	819.239	0.455	1786.47	0.455	654.952	0.455	1594.72	0.455	1926.14	0.455	1582.94	0.455	1428.36	0.455	2363.24	0.455	1881.49
0.52	1376.2	0.52	1005.84	0.52	1915.41	0.52	1615.8	0.52	1222.5	0.52	780.875	0.52	1605.43	0.52	990.928	0.52	1020.29	0.52	914.83	0.52	1013.49	0.52	822.079	0.52	2077.17	0.52	697.509	0.52	1777.59	0.52	2032.4	0.52	1617.17	0.52	1848.24	0.52	2291.61	0.52	2174.48
0.585	1645.98	0.585	1152.07	0.585	2053.3	0.585	1722.17	0.585	1276.17	0.585	799.112	0.585	1718.65	0.585	1032.95	0.585	1073.29	0.585	971.02	0.585	1039.19	0.585	843.296	0.585	2424.7	0.585	702.42	0.585	1928.94	0.585	2093.47	0.585	1672.65	0.585	2301.17	0.585	2104.29	0.585	2403.35
0.65	1818.91	0.65	1385.68	0.65	2170.95	0.65	1679.67	0.65	1393.76	0.65	792.019	0.65	1854.08	0.65	1013.65	0.65	1070	0.65	1076.96	0.65	1069.21	0.65	926.482	0.65	2554.32	0.65	744.453	0.65	2017.36	0.65	2149.61	0.65	1794.21	0.65	2596.52	0.65	1923.37	0.65	2554.12
0.715	2036.87	0.715	1728.24	0.715	2208.1	0.715	1568.26	0.715	1511.33	0.715	786.9	0.715	1997.56	0.715	1019.91	0.715	1065.42	0.715	1183.3	0.715	1135.67	0.715	1102.45	0.715	2631.76	0.715	862.535	0.715	1989.22	0.715	2242.26	0.715	1992.44	0.715	2462.4	0.715	1706.75	0.715	2494.67
0.78	2163.4	0.78	2056.13	0.78	2122.91	0.78	1383.87	0.78	1699.83	0.78	803.63	0.78	2175.36	0.78	1025.66	0.78	1083.3	0.78	1363.59	0.78	1300.37	0.78	1481.89	0.78	2644.54	0.78	1055.53	0.78	1896.94	0.78	2299.29	0.78	2158.1	0.78	2069.47	0.78	1531.51	0.78	2283.33
0.845	2225.27	0.845	2332.22	0.845	2054.11	0.845	1233.96	0.845	1900.94	0.845	842.074	0.845	2313.68	0.845	1056.55	0.845	1173.01	0.845	1574.05	0.845	1487.71	0.845	2075.43	0.845	2679.81	0.845	1433.98	0.845	1728.76	0.845	2353.75	0.845	2371.87	0.845	1671.69	0.845	1390.43	0.845	1888.14
0.91	2150.55	0.91	2354.79	0.91	1959.57	0.91	1060.34	0.91	2080.09	0.91	916.212	0.91	2506.88	0.91	1125.19	0.91	1224.15	0.91	1759.53	0.91	1602.34	0.91	2813.82	0.91	2600.58	0.91	1883.77	0.91	1514.32	0.91	2261.26	0.91	2539.73	0.91	1365.31	0.91	1320.83	0.91	1493.1
0.975	2141.52	0.975	2286.17	0.975	1831.96	0.975	968.872	0.975	2367.8	0.975	984.828	0.975	2645.75	0.975	1239.95	0.975	1348.37	0.975	1904.13	0.975	1749.4	0.975	3409.07	0.975	2425.99	0.975	2137.2	0.975	1417.66	0.975	1998.17	0.975	2629.87	0.975	1173.41	0.975	1208.75	0.975	1156.09
1.04	1983.52	1.04	2118.45	1.04	1693.28	1.04	878.183	1.04	2649.94	1.04	1196.83	1.04	2747.57	1.04	1387.4	1.04	1545.09	1.04	1871.84	1.04	1922.46	1.04	3613.38	1.04	2198.82	1.04	1991.93	1.04	1282.54	1.04	1657.31	1.04	2676.84	1.04	1075.64	1.04	1145.41	1.04	955.068
1.105	1886.54	1.105	1908.3	1.105	1564.31	1.105	842.981	1.105	2849.18	1.105	1481.14	1.105	2767.23	1.105	1535.27	1.105	1759.39	1.105	1732.19	1.105	2143.22	1.105	3357.52	1.105	1886.11	1.105	1597.41	1.105	1208.3	1.105	1371.32	1.105	2552.53	1.105	1042.01	1.105	1103.34	1.105	850.734
1.17	1822.28	1.17	1693.65	1.17	1478.68	1.17	863.427	1.17	3010.5	1.17	1733.49	1.17	2756.55	1.17	1659.21	1.17	2037.33	1.17	1506.79	1.17	2311.4	1.17	2619.32	1.17	1696.06	1.17	1136.37	1.17	1146.28	1.17	1126.93	1.17	2386.47	1.17	1005.47	1.17	1051.61	1.17	808.349
1.235	1750.32	1.235	1542.5	1.235	1412.3	1.235	919.28	1.235	2995.91	1.235	1798.62	1.235	2705.25	1.235	1722.63	1.235	2235.26	1.235	1216.76	1.235	2373.51	1.235	1827.57	1.235	1478.24	1.235	850.561	1.235	1118.19	1.235	987.87	1.235	2208.7	1.235	971.2	1.235	1073.09	1.235	751.205
1.3	1745.1	1.3	1404.05	1.3	1380.95	1.3	968.72	1.3	2865.96	1.3	1621.5	1.3	2572.03	1.3	1727.67	1.3	2396.38	1.3	1022.41	1.3	2324.78	1.3	1266.52	1.3	1368.43	1.3	741.188	1.3	1062.07	1.3	891.286	1.3	1939.98	1.3	938.987	1.3	1047.53	1.3	712.985
1.365	1724.78	1.365	1260.94	1.365	1308.74	1.365	993.07	1.365	2718.93	1.365	1336.33	1.365	2478.31	1.365	1661.93	1.365	2348.6	1.365	883.903	1.365	2221.08	1.365	905.351	1.365	1302.25	1.365	681.107	1.365	1006.2	1.365	794.448	1.365	1717.3	1.365	924.743	1.365	1037.51	1.365	704.713
1.43	1695.78	1.43	1151.83	1.43	1268.43	1.43	966.309	1.43	2448.91	1.43	1129.56	1.43	2304.18	1.43	1489.14	1.43	2086.92	1.43	812.181	1.43	2043.38	1.43	749.107	1.43	1198.71	1.43	679.147	1.43	973.033	1.43	738.814	1.43	1513.69	1.43	930.891	1.43	1020.93	1.43	672.285
1.495	1734.58	1.495	1055.34					1.495	2173.69	1.495	1078.07	1.495	2077.4	1.495	1322.12	1.495	1851.8	1.495	836.97	1.495	1800.89	1.495	671.741	1.495	1096.45	1.495	654.868	1.495	974.02	1.495	736.34	1.495	1466.14	1.495	894.022
1.56	1693.4	1.56	1028.41					1.56	1903.36	1.56	1077.8	1.56	1966.43	1.56	1145.09	1.56	1652.08	1.56	807.779	1.56	1622.96	1.56	649.894	1.56	1061.82	1.56	659.472	1.56	965.25	1.56	702.875	1.56	1372.83	1.56	865.52
1.625	1626.48	1.625	983.508					1.625	1706.9	1.625	1034.46	1.625	1823.53	1.625	1037.74	1.625	1536.45	1.625	778.738	1.625	1486.74	1.625	634.099	1.625	1037.16	1.625	715.202	1.625	952.896	1.625	675.489	1.625	1322.74	1.625	864.195
1.69	1638.09	1.69	920.502					1.69	1611.89	1.69	1057.54	1.69	1705.49	1.69	972.307	1.69	1385.93	1.69	763.973	1.69	1340	1.69	656.742	1.69	1014.76	1.69	735.637					1.69	1291.76	1.69	870.818
1.755	1614.86	1.755	900.151					1.755	1562.9	1.755	1088.47	1.755	1608.34	1.755	894.239	1.755	1313.01	1.755	738.498	1.755	1291.04	1.755	662.171	1.755	999.997	1.755	818.589					1.755	1256.39	1.755	861.251
1.82	1590.06	1.82	849.067					1.82	1496.7	1.82	1079.97	1.82	1577.61	1.82	874.814	1.82	1208.55	1.82	718.458	1.82	1237.61	1.82	650.587	1.82	959.329	1.82	852.928					1.82	1241.15	1.82	911.872
1.885	1564.24	1.885	864.733					1.885	1438.91	1.885	1059.79	1.885	1477.1	1.885	857.17	1.885	1186.88	1.885	746.508	1.885	1144.59	1.885	706.955	1.885	978.396	1.885	787.733
								1.95	1419.9	1.95	980.698	1.95	1385.39	1.95	848.543	1.95	1123.26	1.95	740.53	1.95	1141.1	1.95	712.01	1.95	956.767	1.95	782.471
								2.015	1429.55	2.015	874.283	2.015	1316.99	2.015	887.951	2.015	1123.78	2.015	716.247	2.015	1117.52	2.015	687.738	2.015	921.99	2.015	706.484
								2.08	1467.56	2.08	835.816	2.08	1281.41	2.08	894.458	2.08	1050.05	2.08	697.874	2.08	1078.92	2.08	685.668	2.08	908.226	2.08	640.159
								2.145	1549.84	2.145	807.02	2.145	1277.4	2.145	920.924					2.145	1107.25	2.145	670.648
												2.21	1253.79	2.21	895.564					2.21	1087.01	2.21	669.061
												2.275	1247.93	2.275	890.92					2.275	1028.34	2.275	675.732
												2.34	1201.88	2.34	890.964
												2.405	1200.23	2.405	917.086
4dpf8_mem-1				4dpf8_mem-2				4dpf8_mem-3				4dpf8_mem-4				4dpf8_mem-5				4dpf8_mem-6				4dpf8_mem-7				4dpf8_mem-8				4dpf8_mem-9				4dpf8_mem-10
Distance	mScarlet	Distance	Sema7A	Distance	mScarlet	Distance	Sema7A	Distance	mScarlet	Distance	Sema7A	Distance	mScarlet	Distance	Sema7A	Distance	mScarlet	Distance	Sema7A	Distance	mScarlet	Distance	Sema7A	Distance	mScarlet	Distance	Sema7A	Distance	mScarlet	Distance	Sema7A	Distance	mScarlet	Distance	Sema7A	Distance	mScarlet	Distance	Sema7A
0	1267.39	0	738.134	0	1641.97	0	672.351	0	843.781	0	762.44	0	1120.28	0	784.002	0	1107.96	0	764.137	0	1061.8	0	659	0	1143.85	0	800.963	0	844.907	0	669.617	0	1107.69	0	742.099	0	1142.45	0	751.784
0.065	1288.09	0.065	725.516	0.065	1708.11	0.065	688.926	0.065	835.286	0.065	784.081	0.065	1143.85	0.065	802.952	0.065	1126.39	0.065	793.575	0.065	1092.8	0.065	675.6	0.065	1150.7	0.065	843.839	0.065	861.439	0.065	687.391	0.065	1094.5	0.065	685.106	0.065	1176.2	0.065	757.512
0.13	1367.73	0.13	763.736	0.13	1738.22	0.13	720.215	0.13	834.531	0.13	819.511	0.13	1147.04	0.13	853.654	0.13	1121.96	0.13	828.433	0.13	1144.6	0.13	712	0.13	1174.24	0.13	902.228	0.13	874.798	0.13	693.214	0.13	1127.3	0.13	691.685	0.13	1228.06	0.13	742.257
0.195	1478.08	0.195	806.942	0.195	1896.33	0.195	786.258	0.195	846.879	0.195	842.14	0.195	1172.61	0.195	905.641	0.195	1161.56	0.195	889.628	0.195	1097.8	0.195	712.2	0.195	1178.8	0.195	955.433	0.195	887.889	0.195	720.263	0.195	1096.67	0.195	676.128	0.195	1310.58	0.195	769.923
0.26	1694.57	0.26	843.303	0.26	2163.98	0.26	839.926	0.26	865.089	0.26	808.507	0.26	1195.49	0.26	953.573	0.26	1198.84	0.26	947.151	0.26	1131.4	0.26	780.4	0.26	1229.51	0.26	1084.93	0.26	882.898	0.26	767.194	0.26	1159.69	0.26	722.305	0.26	1356.3	0.26	824.272
0.325	1873.32	0.325	910.643	0.325	2493.54	0.325	878.089	0.325	876.078	0.325	794.931	0.325	1263.2	0.325	1002.22	0.325	1230.32	0.325	1016.51	0.325	1175.6	0.325	831.4	0.325	1202.88	0.325	1335.16	0.325	927.028	0.325	780.751	0.325	1144.24	0.325	765.307	0.325	1531.49	0.325	879.216
0.39	2088.7	0.39	901.736	0.39	2819.35	0.39	901.488	0.39	870.117	0.39	812.601	0.39	1309.79	0.39	1160.24	0.39	1254.71	0.39	1039.28	0.39	1253.8	0.39	890	0.39	1272.46	0.39	1557.57	0.39	917.378	0.39	819.783	0.39	1199.99	0.39	831.648	0.39	1804.77	0.39	1025.13
0.455	2259.89	0.455	987.043	0.455	3148.35	0.455	875.862	0.455	888.285	0.455	889.469	0.455	1383.33	0.455	1350.78	0.455	1320.41	0.455	1021.9	0.455	1378	0.455	913	0.455	1295.84	0.455	1649.27	0.455	987.027	0.455	914.681	0.455	1232.09	0.455	1002.16	0.455	2038.6	0.455	1330.08
0.52	2355.32	0.52	1055.77	0.52	3404.65	0.52	854.615	0.52	905.734	0.52	948.996	0.52	1522.67	0.52	1682.55	0.52	1359.64	0.52	1066.82	0.52	1528	0.52	953.4	0.52	1374.25	0.52	1619.32	0.52	1033.82	0.52	1081.05	0.52	1276.3	0.52	1162.87	0.52	2277.43	0.52	1950.35
0.585	2311.19	0.585	1142.7	0.585	3580	0.585	895.806	0.585	895.6	0.585	1092.76	0.585	1683.48	0.585	1960.93	0.585	1339.04	0.585	1063.03	0.585	1665.8	0.585	1052.8	0.585	1475.72	0.585	1534.33	0.585	1134.74	0.585	1177.7	0.585	1340.66	0.585	1359.09	0.585	2543.33	0.585	2700.48
0.65	2121.79	0.65	1142.41	0.65	3468.39	0.65	935.206	0.65	952.844	0.65	1278.23	0.65	1835.8	0.65	1973.91	0.65	1373.88	0.65	1118.05	0.65	1821.8	0.65	1204.6	0.65	1584.66	0.65	1303.38	0.65	1315	0.65	1298.02	0.65	1375.23	0.65	1379.76	0.65	2537.66	0.65	3320.72
0.715	1984	0.715	1140.93	0.715	3332.9	0.715	1011.42	0.715	971.673	0.715	1495.22	0.715	2017.08	0.715	1711.6	0.715	1420.68	0.715	1160.53	0.715	1922.6	0.715	1356.8	0.715	1678.78	0.715	1120.68	0.715	1522.51	0.715	1337.86	0.715	1522.45	0.715	1332.93	0.715	2472.34	0.715	3092.73
0.78	1885.26	0.78	1119.58	0.78	3220.62	0.78	1053.99	0.78	1010.15	0.78	1693.71	0.78	2082.79	0.78	1398.16	0.78	1490.94	0.78	1164.88	0.78	1904.2	0.78	1388.4	0.78	1779.08	0.78	940.032	0.78	1822.64	0.78	1289.16	0.78	1666.85	0.78	1288.02	0.78	2321.55	0.78	2348.89
0.845	1707.72	0.845	1114.27	0.845	3135.49	0.845	1108.41	0.845	1087.13	0.845	1766.32	0.845	1900.58	0.845	1135.63	0.845	1548.61	0.845	1190.76	0.845	1916.4	0.845	1360.2	0.845	1716.9	0.845	839.25	0.845	2045.99	0.845	1190.72	0.845	1844.25	0.845	1171.31	0.845	2124.51	0.845	1639.35
0.91	1509.72	0.91	1164.53	0.91	3161.34	0.91	1167.1	0.91	1185.26	0.91	1763.97	0.91	1716.22	0.91	962.155	0.91	1625.97	0.91	1191.6	0.91	1915.6	0.91	1285.6	0.91	1553.66	0.91	778.033	0.91	2167.46	0.91	1060.96	0.91	1924.61	0.91	1053.94	0.91	1990.69	0.91	1115.26
0.975	1441.6	0.975	1147.03	0.975	3148.81	0.975	1145.61	0.975	1376.74	0.975	1713.02	0.975	1509.95	0.975	894.366	0.975	1699.62	0.975	1130.87	0.975	1795.8	0.975	1118.8	0.975	1383.55	0.975	741.18	0.975	2184.8	0.975	938.935	0.975	1926.1	0.975	914.729	0.975	1864.92	0.975	904.561
1.04	1349.55	1.04	1095.54	1.04	3120.1	1.04	1080.17	1.04	1537.8	1.04	1463.25	1.04	1401.16	1.04	843.799	1.04	1730.54	1.04	1107.31	1.04	1589.8	1.04	958.6	1.04	1249.23	1.04	705.367	1.04	2080.77	1.04	813.355	1.04	1879.26	1.04	796.153	1.04	1717.27	1.04	764.169
1.105	1241.88	1.105	967.456	1.105	3116.1	1.105	1014	1.105	1624.73	1.105	1244.14	1.105	1342.05	1.105	815.395	1.105	1703.1	1.105	1068.7	1.105	1504.6	1.105	846.8	1.105	1161.37	1.105	709.675	1.105	1961.26	1.105	766.785	1.105	1607.9	1.105	765.019	1.105	1598.33	1.105	724.608
1.17	1193.96	1.17	832.004	1.17	2932.67	1.17	933.521	1.17	1551.83	1.17	1029.24	1.17	1269.55	1.17	800.633	1.17	1654.95	1.17	983.599	1.17	1345.4	1.17	725	1.17	1146.47	1.17	698.468	1.17	1823.31	1.17	712.974	1.17	1466.78	1.17	696.082	1.17	1519.24	1.17	694.944
1.235	1156.54	1.235	703.239	1.235	2755.26	1.235	828.096	1.235	1484	1.235	822.111	1.235	1217.27	1.235	796.498	1.235	1562.1	1.235	899.88	1.235	1336.4	1.235	682.4	1.235	1060.99	1.235	707.208	1.235	1722.23	1.235	705.583	1.235	1351.6	1.235	665.671	1.235	1447.21	1.235	660.12
1.3	1179.43	1.3	659.723	1.3	2439.75	1.3	751.879	1.3	1366.96	1.3	723.019	1.3	1231.15	1.3	790.433	1.3	1474.39	1.3	837.177	1.3	1280.2	1.3	643	1.3	1051.26	1.3	662.696	1.3	1637.9	1.3	696.876	1.3	1302.7	1.3	667.495	1.3	1435.61	1.3	646.192
1.365	1155.83	1.365	620.298	1.365	2221.26	1.365	707.554	1.365	1314.77	1.365	682.375	1.365	1222.44	1.365	744.857	1.365	1400.73	1.365	802.661	1.365	1240	1.365	633.2	1.365	1033.36	1.365	674.118	1.365	1532.64	1.365	664.298
1.43	1134.38	1.43	617.69	1.43	1967.4	1.43	686.113	1.43	1327.41	1.43	686.21	1.43	1188.26	1.43	748.4	1.43	1391.92	1.43	767.4	1.43	1212.6	1.43	613.8					1.43	1352.75	1.43	666.72
1.495	1111.57	1.495	590.61	1.495	1736.54	1.495	697.269	1.495	1346	1.495	694.349					1.495	1419.37	1.495	707.838	1.495	1193.2	1.495	639
1.56	1146.87	1.56	587.207	1.56	1520.42	1.56	699.04	1.56	1333.37	1.56	688.044					1.56	1393.84	1.56	666.409	1.56	1204.8	1.56	623.4
1.625	1094.24	1.625	630.697	1.625	1435.54	1.625	714.876	1.625	1298.87	1.625	668.399					1.625	1415.81	1.625	651.811	1.625	1176	1.625	647.6
1.69	1074.92	1.69	619.939	1.69	1330.03	1.69	773.696	1.69	1297.34	1.69	630.445					1.69	1451.58	1.69	637.455
				1.755	1275.72	1.755	795.969	1.755	1293.13	1.755	603.667					1.755	1461.4	1.755	638.576
				1.82	1221.48	1.82	844.289	1.82	1283.29	1.82	613.342
				1.885	1189.58	1.885	834.894
4dpf9_mem-1				4dpf9_mem-2				4dpf9_mem-3				4dpf9_mem-4				4dpf9_mem-5				4dpf9_mem-6				4dpf9_mem-7				4dpf9_mem-8				4dpf9_mem-9				4dpf9_mem-10
Distance	mScarlet	Distance	Sema7A	Distance	mScarlet	Distance	Sema7A	Distance	mScarlet	Distance	Sema7A	Distance	mScarlet	Distance	Sema7A	Distance	mScarlet	Distance	Sema7A	Distance	mScarlet	Distance	Sema7A	Distance	mScarlet	Distance	Sema7A	Distance	mScarlet	Distance	Sema7A	Distance	mScarlet	Distance	Sema7A	Distance	mScarlet	Distance	Sema7A
0	1195.75	0	729.653	0	1514.37	0	823.044	0	1383.04	0	816.015	0	1393.55	0	821.935	0	1181.47	0	725.291	0	1389.06	0	819.366	0	1134.05	0	968.616	0	3042.16	0	742.12	0	1352.99	0	695.167	0	1328.83	0	873.687
0.065	1227.74	0.065	776.226	0.065	1511.67	0.065	818.891	0.065	1362.77	0.065	832.64	0.065	1484.02	0.065	782.666	0.065	1199.02	0.065	741.301	0.065	1356.1	0.065	803.241	0.065	1136.16	0.065	933.778	0.065	3013.91	0.065	736.614	0.065	1365.24	0.065	683.676	0.065	1370.24	0.065	911.904
0.13	1244.11	0.13	803.612	0.13	1539.37	0.13	818.669	0.13	1366.39	0.13	866.586	0.13	1572.06	0.13	793.442	0.13	1216.99	0.13	737.441	0.13	1320.54	0.13	816.859	0.13	1100.69	0.13	977.499	0.13	3054.88	0.13	797.82	0.13	1402.06	0.13	689.188	0.13	1381.45	0.13	945.054
0.195	1296.65	0.195	848.476	0.195	1586.58	0.195	816.447	0.195	1370.7	0.195	871.212	0.195	1622.65	0.195	772.139	0.195	1232.85	0.195	825.32	0.195	1399.11	0.195	836.941	0.195	1140.25	0.195	984.794	0.195	3189.47	0.195	858.219	0.195	1445.01	0.195	713.581	0.195	1472.41	0.195	1030.87
0.26	1334.8	0.26	906.856	0.26	1674.44	0.26	848.182	0.26	1410.63	0.26	844.699	0.26	1678.99	0.26	784.16	0.26	1293.53	0.26	928.524	0.26	1416.15	0.26	893.553	0.26	1171.43	0.26	1103.85	0.26	3355.8	0.26	952.724	0.26	1513.14	0.26	768.715	0.26	1587.32	0.26	1104.19
0.325	1341.44	0.325	930.144	0.325	1720	0.325	908.774	0.325	1431.48	0.325	848.025	0.325	1805.97	0.325	874.874	0.325	1370.94	0.325	1090.41	0.325	1440.63	0.325	978.555	0.325	1220.74	0.325	1250.22	0.325	3467.78	0.325	1085.4	0.325	1576.12	0.325	820.003	0.325	1684.17	0.325	1202.08
0.39	1424.96	0.39	1009.24	0.39	1771.91	0.39	1096.13	0.39	1508.29	0.39	869.22	0.39	1840.52	0.39	985.248	0.39	1422.41	0.39	1392.56	0.39	1521.26	0.39	1094.54	0.39	1215.01	0.39	1465.02	0.39	3505.16	0.39	1292.3	0.39	1648.97	0.39	890.467	0.39	1878.32	0.39	1325.94
0.455	1507.07	0.455	1095.61	0.455	1865.95	0.455	1410.24	0.455	1539.46	0.455	910.298	0.455	1853.95	0.455	1217.18	0.455	1504.73	0.455	1793.3	0.455	1533.59	0.455	1173.4	0.455	1282.43	0.455	1732.64	0.455	3530.31	0.455	1587.53	0.455	1764.6	0.455	1010.66	0.455	1998.92	0.455	1497.47
0.52	1634.31	0.52	1177.49	0.52	1953.4	0.52	1834.44	0.52	1604.46	0.52	983.752	0.52	1943.58	0.52	1545.61	0.52	1692.08	0.52	2217.74	0.52	1618.42	0.52	1274.8	0.52	1326.41	0.52	1971.44	0.52	3535.48	0.52	1882.86	0.52	1880.33	0.52	1116.05	0.52	2123.45	0.52	1618.55
0.585	1792.11	0.585	1272.87	0.585	2202.98	0.585	2264.1	0.585	1786.09	0.585	1093.58	0.585	1978.97	0.585	1805.53	0.585	1815.16	0.585	2387.49	0.585	1736.02	0.585	1358.83	0.585	1420.48	0.585	2159.34	0.585	3395.92	0.585	2078.78	0.585	2014.52	0.585	1310.88	0.585	2268.44	0.585	1794.89
0.65	1934.8	0.65	1432.18	0.65	2486.03	0.65	2302.24	0.65	1937.46	0.65	1284.97	0.65	2025.77	0.65	1858.31	0.65	1957.79	0.65	2469.78	0.65	1924.32	0.65	1456.57	0.65	1512.6	0.65	2184.64	0.65	3149.24	0.65	2131.54	0.65	2151.93	0.65	1613.86	0.65	2501.61	0.65	1876.39
0.715	2097.37	0.715	1546.75	0.715	2766.89	0.715	2023.05	0.715	2174.54	0.715	1624.45	0.715	2104.37	0.715	1763.3	0.715	2029.45	0.715	2372	0.715	2104.03	0.715	1551.1	0.715	1630.96	0.715	2073.64	0.715	2935.63	0.715	1961.63	0.715	2145.76	0.715	1760.6	0.715	2649.24	0.715	1934.54
0.78	2222.5	0.78	1703.77	0.78	3024.97	0.78	1671.34	0.78	2444.78	0.78	2035.32	0.78	2217.94	0.78	1538.66	0.78	2070.23	0.78	2100.45	0.78	2354.33	0.78	1620.5	0.78	1716.03	0.78	1680.48	0.78	2800.11	0.78	1625.69	0.78	2108.76	0.78	1805	0.78	2708	0.78	1843.63
0.845	2381.27	0.845	1799.61	0.845	3061.64	0.845	1493.23	0.845	2674.56	0.845	2262.13	0.845	2252.37	0.845	1279.17	0.845	2027.23	0.845	1816.58	0.845	2494.76	0.845	1587.07	0.845	1776.63	0.845	1335.12	0.845	2667.99	0.845	1344.62	0.845	2001.44	0.845	1545.13	0.845	2608.89	0.845	1634.96
0.91	2619.84	0.91	1892.42	0.91	2990.88	0.91	1431.31	0.91	2761.42	0.91	2172.34	0.91	2184.93	0.91	1048.31	0.91	2069.12	0.91	1412.51	0.91	2548.84	0.91	1501.46	0.91	1745.76	0.91	1042.38	0.91	2494.12	0.91	1024.96	0.91	1871.91	0.91	1246.54	0.91	2368.94	0.91	1358.9
0.975	2681.88	0.975	1921.13	0.975	2698.78	0.975	1285.7	0.975	2762.29	0.975	1738.23	0.975	2079.98	0.975	845.246	0.975	2056.81	0.975	1126.16	0.975	2534.12	0.975	1312.25	0.975	1660.74	0.975	816.213	0.975	2350.83	0.975	900.882	0.975	1679.45	0.975	966.531	0.975	2010.4	0.975	1112.05
1.04	2654.87	1.04	1750.19	1.04	2388.74	1.04	1084.67	1.04	2703.35	1.04	1292.91	1.04	1826.97	1.04	737.779	1.04	2210.56	1.04	881.096	1.04	2375.46	1.04	1123	1.04	1529.86	1.04	701.427	1.04	2256.59	1.04	843.853	1.04	1566.05	1.04	816.867	1.04	1731.31	1.04	898.062
1.105	2484.16	1.105	1524.07	1.105	2109.4	1.105	898.823	1.105	2571	1.105	977.415	1.105	1638.95	1.105	668.555	1.105	2255.84	1.105	758.189	1.105	2326.97	1.105	938.769	1.105	1399.69	1.105	658.614	1.105	2146.29	1.105	851.453	1.105	1508.81	1.105	726.825	1.105	1517.84	1.105	797.174
1.17	2123.75	1.17	1275.01	1.17	1837.72	1.17	776.675	1.17	2345.95	1.17	764.973	1.17	1494.33	1.17	653.418	1.17	2225.25	1.17	705.243	1.17	2254.86	1.17	825.38	1.17	1340	1.17	631.893	1.17	2013.03	1.17	835.021	1.17	1413.98	1.17	682.171	1.17	1377.08	1.17	695.994
1.235	1799.89	1.235	1023.66	1.235	1678.4	1.235	721.238	1.235	2138.59	1.235	716.555	1.235	1401.26	1.235	627.439	1.235	2051.47	1.235	654.805	1.235	2218.71	1.235	768.46	1.235	1324.82	1.235	603.151	1.235	1928.87	1.235	862.466	1.235	1346.42	1.235	665.159	1.235	1270.59	1.235	640.311
1.3	1567.88	1.3	855.149	1.3	1524.43	1.3	677.536	1.3	1934.43	1.3	667.352	1.3	1316.28	1.3	620.413	1.3	1890.05	1.3	631.172	1.3	2147.27	1.3	731.381	1.3	1362.56	1.3	602.319					1.3	1308.05	1.3	648.083	1.3	1241.78	1.3	616.501
1.365	1435.81	1.365	762.107	1.365	1471.58	1.365	653.576	1.365	1754.13	1.365	676.232	1.365	1286.49	1.365	634.453	1.365	1649.15	1.365	646.421	1.365	2037.53	1.365	701.865	1.365	1394.28	1.365	602.385					1.365	1326.12	1.365	624.857	1.365	1211.88	1.365	599.609
1.43	1323.63	1.43	701.266	1.43	1376.79	1.43	662.26	1.43	1652.92	1.43	659.804	1.43	1273.69	1.43	602.45	1.43	1465.26	1.43	643.643	1.43	1903.75	1.43	680.755	1.43	1414.2	1.43	599.322									1.43	1184.87	1.43	574.146
1.495	1246.17	1.495	672.465					1.495	1601.25	1.495	675.483	1.495	1229.27	1.495	598.062					1.495	1780.72	1.495	672.908													1.495	1144.36	1.495	561.718
1.56	1217.1	1.56	641.442					1.56	1524.41	1.56	675.497																									1.56	1149.59	1.56	571.653
1.625	1190.16	1.625	615.615					1.625	1471.42	1.625	637.353																									1.625	1159.16	1.625	570.063
1.69	1146.47	1.69	593.626
1.755	1161.63	1.755	587.136
1.82	1162.92	1.82	600.117
