# Supplementary material for: Semaphorin7A patterns neural circuitry in the lateral line of the zebrafish
Source: eLife. 2024 Aug 12;12:RP89926. doi: 10.7554/eLife.89926 (PMC11318972; doi:10.7554/eLife.89926)
Supplement: Figure 2—source data 1. [file elife-89926-fig2-data1.xlsx]

## Sheet: Hair Cell Numbers Con Vs Mut
Control larvae_2dpf		Control larvae_3dpf		Control larvae_4dpf				sema7a-/- mutant larvae_2dpf		sema7a-/- mutant larvae_3dpf		sema7a-/- mutant larvae_4dpf					Control larvae_2dpf	sema7a-/- mutant larvae_2dpf	Control larvae_3dpf	sema7a-/- mutant larvae_3dpf	Control larvae_4dpf	sema7a-/- mutant larvae_4dpf
E1	HC number	E1	HC number	E1	HC number			E1	HC number	E1	HC number	No experiment number	HC number			Average	7.87879	7.52941	9.75862	9.22642	12.6571	12.1481
2 dpf1	10	3 dpf	9	4 dpf	14			2 dpf0	10	3 dpf1	7	4 dpf2	12			SEM	0.216539	0.283604	0.173655	0.493469	0.219911	0.259869
2 dpf2	10	3 dpf1	10	4 dpf1	12			2 dpf1	6	3 dpf2	10	4 dpf3	12
2 dpf3	8	3 dpf2	7	4 dpf2	11			2 dpf2	8	3 dpf3	8	4 dpf4	12
2 dpf5	8	3 dpf3	7	E2				2 dpf3	6	3 dpf4	12	4 dpf5	11
2 dpf6	8	E2		4 dpf2	14			2 dpf4	10	3 dpf5	10	4 dpf6	14
E2		3 dpf3	12	4 dpf3	12			2 dpf5	8	E2		4 dpf7	10
2 dpf5	6	3 dpf4	12	4 dpf4	12			sema7a-/- mutant larvae_2dpf		3 dpf6	6	4 dpf8	12
2 dpf6	6	3 dpf5	12	E3				E1		3 dpf7	10	4 dpf9	12
2 dpf7	8	3 dpf6	7	4 dpf4	12			2 dpf0	4	3 dpf9	12	4 dpf10	14
2 dpf8	8	E3		4 dpf5	14			2 dpf2	6	sema7a-/- mutant larvae_3dpf		4 dpf11	11
E3		3 dpf6	10	4 dpf6	12			2 dpf3	8	E1		4 dpf12	12
2 dpf8	8	3 dpf7	10	E4				E2		3 dpf2	8	4 dpf13	10
2 dpf9	7	3 dpf8	10	4 dpf6	13			2 dpf3	10	3 dpf3	6	sema7a-/- mutant larvae_4dpf
2 dpf10	8	3 dpf9	10	4 dpf7	12			2 dpf4	6	3 dpf4	10	E1
2 dpf11	6	E4		4 dpf8	13			2 dpf5	6	3 dpf5	8	4 dpf	14
E4		3 dpf9	8	E5				E3		3 dpf6	8	sema7a-/- mutant larvae_4dpf
2 dpf11	9	3 dpf10	8	4 dpf8	12			2 dpf8	6	E2		E1
2 dpf12	8	3 dpf11	8	4 dpf9	14			2 dpf10	7	3 dpf6	9	4 dpf	12
2 dpf13	8	E5		4 dpf10	12			E4		3 dpf7	8	4 dpf2	14
2 dpf14	8	3 dpf11	11	E6				2 dpf10	7	E3		E2
E5		3 dpf12	10	4 dpf10	14			2 dpf11	8	3 dpf8	10	4 dpf2	10
2 dpf14	9	3 dpf13	10	4 dpf11	12			2 dpf12	12	3 dpf9	12	4 dpf3	13
2 dpf15	8	3 dpf14	9	4 dpf12	12					E4		4 dpf4	12
2 dpf16	7	E6		E7				Average hair cell number	7.52941	3 dpf11	10	E3
2 dpf17	10	3 dpf14	10	4 dpf12	12			SEM	0.493469	3 dpf12	8	4 dpf6	12
E6		3 dpf15	12	4 dpf13	14					3 dpf13	8	sema7a-/- mutant larvae_4dpf
2 dpf17	8	3 dpf16	10	E8						E5		E1
2 dpf18	8	3 dpf17	10	4 dpf13	14					3 dpf13	8	4 dpf0	12
2 dpf19	8	E7		4 dpf14	12					3 dpf14	8	4 dpf3	14
2 dpf20	7	3 dpf17	12	E9						3 dpf15	7	E3
E7		3 dpf18	10	4 dpf14	14					3 dpf16	10	4 dpf4	10
2 dpf20	8	E8		4 dpf15	14					sema7a-/- mutant larvae_3dpf		4 dpf5	14
2 dpf21	6	3 dpf18	10	4 dpf16	12					E1		4 dpf6	11
2 dpf22	8	3 dpf19	8	E10						3 dpf	10	4 dpf7	12
2 dpf23	7	3 dpf20	11	4 dpf16	14					3 dpf1	8	E4
E8		3 dpf21	10	4 dpf17	13					3 dpf2	10	4 dpf7	12
2 dpf23	10			4 dpf18	11					E2		4 dpf8	14
2 dpf24	10	Average hair cell number	9.75862	4 dpf19	12					3 dpf2	12
2 dpf25	6	SEM	0.283604	E11						3 dpf3	10	Average hair cell number	12.1481
2 dpf26	6			4 dpf19	12					E3		SEM	0.259869
				4 dpf20	12					3 dpf4	10
Average hair cell number	7.87879			4 dpf21	11					3 dpf5	8
SEM	0.216539			E12						3 dpf6	8
				4 dpf21	14					E4
				4 dpf22	13					3 dpf7	10
				4 dpf23	12					3 dpf8	8
										E5
				Average hair cell number	12.6571					3 dpf8	7
				SEM	0.173655					3 dpf9	10
										3 dpf11	12
										E6
										3 dpf12	10
*Each subsection in a column denotes a separate experiment.										3 dpf13	11
										E7
										3 dpf13	10
										E8
										3 dpf13	8
										3 dpf15	12
										E9
										3 dpf15	10
										3 dpf17	8
										sema7a-/- mutant larvae_3dpf
										E1
										3 dpf	8
										3 dpf1	10
										3 dpf3	10
										E2
										3 dpf4	8
										E3
										3 dpf6	12
										3 dpf9	8
										E4
										3 dpf9	8
										3 dpf10	10
										3 dpf11	10
										Average hair cell number	9.22642
										SEM	0.219911

## Sheet: Sema7A Intensity Con Vs Mut
Control larvae_3dpf
NM 1					NM 2			NM 3			NM 4						NM 5					NM 6				NM 7				NM 8				NM 9				NM 10				NM 11					NM 12
Sema7A intensity	137.497	137.119	140.529	140.414	149.806	139.865	141.467	153.429	156.303	157.316	140.183	143.318	140.403	144.066	143.412	141.163	138.511	137.821	143.221	144.01	138.898	144.899	142.572	145.743	137.833	141.909	139.825	144.827	135.831	132.838	132.049	135.394	140.282	148.505	146.705	159.465	145.262	151.497	146.165	140.134	140.197	142.281	142.722	144.4	141.078	139.126	151.997	145.98	139.763
sem7a-/- mutant larvae_3dpf
NM 1				NM 2				NM 3				NM 4				NM 5		NM 6		NM 7					NM 8				NM 9				NM 10			NM 11		NM 12					NM 13			NM 14
Sema7A intensity	58.3185	57.789	58.14	59.6595	58.6795	58.464	58.045	57.9615	58.4635	58.568	58.328	56.466	56.5565	56.756	57.1675	56.6785	57.1005	56.0635	56.8365	56.344	56.527	56.155	55.9825	56.185	56.1035	57.0415	56.3225	56.483	57.002	56.89	56.386	56.6275	56.087	55.6505	55.528	55.918	55.8485	56.791	56.8135	56.667	57.3465	56.649	56.117	56.0085	56.1365	55.7885	55.7845	55.813	55.457
	Control larvae_Normalized Sema7A Intensity	sema7a-/- mutant larvae_Normalized Sema7A Intensity	Data Normalized by Maximal Sema7A intensity Value in Control Larvae					From in each neuromast (NM), the Sema7A intensity was measured from a few hair cells
	0.843152	0.357618	163.075
	0.840834	0.354371
	0.861745	0.356523
	0.861039	0.365841
	0.918633	0.359831
	0.857673	0.35851
	0.867497	0.355941
	0.940849	0.355428
	0.958473	0.358507
	0.964685	0.359148
	0.859623	0.357676
	0.878847	0.346258
	0.860972	0.346813
	0.883434	0.348036
	0.879424	0.35056
	0.865632	0.347561
	0.84937	0.350149
	0.845139	0.34379
	0.878252	0.34853
	0.883091	0.34551
	0.851743	0.346632
	0.888542	0.344351
	0.874273	0.343293
	0.893718	0.344535
	0.845212	0.344035
	0.870207	0.349787
	0.857428	0.345378
	0.888101	0.346362
	0.832936	0.349545
	0.814582	0.348858
	0.809744	0.345767
	0.830256	0.347248
	0.86023	0.343934
	0.910655	0.341257
	0.899617	0.340506
	0.977863	0.342897
	0.890768	0.342471
	0.929002	0.348251
	0.896305	0.348389
	0.859322	0.34749
	0.859709	0.351657
	0.872488	0.34738
	0.875192	0.344118
	0.885482	0.343452
	0.865111	0.344237
	0.853141	0.342103
	0.932068	0.342079
	0.895171	0.342254
	0.857047	0.340071
	0.855944	0.344458
	0.900181	0.342352
	0.850958	0.341956
	0.845169	0.342536
	0.859831	0.341895
	0.829857	0.339785
	0.829857	0.342484
	0.805764	0.340343
	0.833451	0.340153
	0.821236	0.341438
	0.841104	0.340757
	0.830863	0.340276
	0.827135	0.340717
	0.829109	0.341769
	0.846868	0.340932
	0.851823	0.342548
	0.866325	0.344483
	0.832145	0.343376
	0.848009	0.342398
	0.843379	0.342646
	0.857673	0.342873
	0.835254	0.344225
	0.882177	0.343348
	0.874616	0.341662
	0.896814	0.342992
	0.897366	0.341331
	0.860739	0.342155
	0.894674	0.340941
	0.84306	0.341625
	0.896661	0.34207
	0.866295	0.340908
	0.842894	0.341754
	0.883575	0.341159
	0.93576	0.341012
	0.911838	0.342113
	0.922441	0.342643
	0.888272	0.34226
	0.859923	0.346135
	0.92038	0.343909
	0.92639	0.344737
	0.884808	0.344093
	0.944118	0.345001
	0.978249	0.343554
	1	0.3452
	0.830158	0.342223
	0.828484	0.34119
	0.862125	0.347776
	0.839798	0.346034
	0.870698	0.342689
		0.34172
Average	0.873046	0.34547
SEM	0.00389393	0.000529958
Fold decrease	2.52712
[truncated: 49 more columns]

## Sheet: FM4-64 intensity quantification
Control larvae_4dpf		sema7a mutant larvae_4dpf
Neuromast 1		Neuromast 1
Hair cell	FM4-64 intensity	Hair cell	FM4-64 intensity
1	830.003	1	1431.97
2	1205.98	2	810.104
3	856.041	3	865.562
4	726.898	4	729.48
5	866.994	5	865.923
6	710.684	6	751.858
7	905.225	7	942.656
8	986.228	8	926.606
9	1028.45	9	1108.38
10	788.868	10	746.322
Neuromast 2		Neuromast 2
Hair cell	FM4-64 intensity	Hair cell	FM4-64 intensity
1	610.446	1	583.315
2	690.052	2	653.144
3	1009.95	3	1008.84
4	702.557	4	784.757
5	886.43	5	980.778
6	596.043	6	602.487
7	785.779	7	805.55
8	996.738	8	901.408
9	660.98	9	705.46
10	818.343	10	869.108
Neuromast 3		Neuromast 3
Hair cell	FM4-64 intensity	Hair cell	FM4-64 intensity
1	739.284	1	699.301
2	884.14	2	887.282
3	1035.86	3	1069.39
4	658.04	4	669.081
5	1020.74	5	949.553
6	740.353	6	726.367
7	725.363	7	792.842
8	673.33	8	621.741
9	832.441	9	845.67
10	743.992	10	788.483
11	906.38	11	920.209
12	839.471	12	878.725
Neuromast 4		Neuromast 4
Hair cell	FM4-64 intensity	Hair cell	FM4-64 intensity
1	862.223	1	878.858
2	750.039	2	725.571
3	731.399	3	788.292
4	766.829	4	764.004
5	1000.18	5	992.92
6	673.049	6	658.855
7	1080.59	7	1225.16
8	758.772	8	788.638
9	940.423	9	956.12
10	784.744	10	808.256
11	634.34	11	690.662
12	865.118	12	913.775
Neuromast 5		Neuromast 5
Hair cell	FM4-64 intensity	Hair cell	FM4-64 intensity
1	598.957	1	686.485
2	574.231	2	625.879
3	782.046	3	805.777
4	499.198	4	481.999
5	862.791	5	859.929
6	608.782	6	680.514
7	619.206	7	656.679
8	670.481	8	703.622
Neuromast 6		Neuromast 6
Hair cell	FM4-64 intensity	Hair cell	FM4-64 intensity
1	710.639	1	762.817
2	692.641	2	716.189
3	614.954	3	680.966
4	578.913	4	583.633
5	601.624	5	608.93
6	616.757	6	620.008
7	479.508	7	503.228
8	474.016	8	486.671
