# Supplementary material for: Semaphorin7A patterns neural circuitry in the lateral line of the zebrafish
Source: eLife. 2024 Aug 12;12:RP89926. doi: 10.7554/eLife.89926 (PMC11318972; doi:10.7554/eLife.89926)
Supplement: Figure 4—source data 1. [file elife-89926-fig4-data1.xlsx]

## Sheet: Sheet1
Accuracy of 18 extended axonal arbors in finding ectopic Sema7Asec sources.
Projection Path	Source Path	Projection Proximity
83.276	83.7444	1.05358
47.8619	47.5141	2.40488
30.8686	31.0488	1.00585
36.6824	38.5657	9.71854
27.1172	30.5217	3.63018
41.5679	48.4931	8.01225
65.9381	66.3273	3.34196
53.5411	48.1366	6.04607
61.4272	59.0248	2.72533
59.9278	61.7918	2.00177
119.786	118.818	5.98709
69.4478	69.1754	0.501119
61.3704	61.311	0.784038
50.2603	50.4812	0.7581
50.1669	50.2122	0.45488
54.6893	54.6792	0.637899
142.558	143.132	7.16857
69.8943	71.165	7.81894
