# Supplementary material for: Semaphorin7A patterns neural circuitry in the lateral line of the zebrafish
Source: eLife. 2024 Aug 12;12:RP89926. doi: 10.7554/eLife.89926 (PMC11318972; doi:10.7554/eLife.89926)
Supplement: Figure 6—source data 1. [file elife-89926-fig6-data1.xlsx]

## Sheet: Rib num and area in Con larvae
Ribeye punctae number							Ribeye punctae area							Ribeye punctae number																Ribeye punctae area																	Ribeye punctae number
Control larvae 2 dpf							NM 1							Control larvae 3dpf																NM 1																	Control larvae 4 dpf
NM 1							HC 1	HC 2	HC 3	HC 4	HC 5	HC 6		NM 1																HC 1	HC 2	HC 3	HC 4	HC 5	HC 6	HC 7	HC 8	HC 9	HC 10	HC 11	HC 12	HC 13	HC 14				NM 1
HC 1	HC 2	HC 3	HC 4	HC 5	HC 6		0.296	0.317	0	0.076	0.287	0		HC 1	HC 2	HC 3	HC 4	HC 5	HC 6	HC 7	HC 8	HC 9	HC 10	HC 11	HC 12	HC 13	HC 14			0.655	0.363	0.275	0.334	0.575	0.482	0.862	0.232	0.651	0.52	0.431	0.739	0	0				HC 1	HC 2	HC 3
2	4	0	4	5	0		0.245	0.249		0.076	0.384			4	7	6	7	3	4	3	4	3	3	4	4	0	0			0.566	0.553	0.19	0.106	0.684	0.583	0.566	0.292	0.241	0.444	0.532	0.659						3	4	3
NM 2								0.342		0.139	0.528			NM 2																0.486	0.486	0.266	0.452	0.528	0.511	0.448	0.325	0.625	0.313	0.376	0.249						NM 2
HC 1	HC 2	HC 3	HC 4	HC 5	HC 6			0.254		0.139	0.575			HC 1	HC 2	HC 3	HC 4	HC 5	HC 6	HC 7	HC 8	HC 9	HC 10							0.182	0.313	0.241	0.52		0.351		0.334			0.431	0.296						HC 1	HC 2	HC 3
4	3	0	0	4	3						0.363			4	3	4	2	3	6	5	4	4	5								0.431	0.203	0.49														4	5	6
NM 3							NM 2							NM 3																	0.351	0.148	0.469														NM 3
HC 1	HC 2	HC 3	HC 4				HC 1	HC 2	HC 3	HC 4	HC 5	HC 6		HC 1	HC 2	HC 3	HC 4	HC 5	HC 6	HC 7	HC 8	HC 9	HC 10								0.207		0.537														HC 1	HC 2	HC 3
4	3	3	2				0.401	0.541	0	0	0.515	0.359		5	5	3	3	3	4	4	3	0	0							NM 2																	4	4	6
NM 4							0.237	0.444			0.617	0.321		NM 4																HC 1	HC 2	HC 3	HC 4	HC 5	HC 6	HC 7	HC 8	HC 9	HC 10								NM 4
HC 1	HC 2	HC 3	HC 4	HC 5	HC 6		0.258	0.592			0.317	0.292		HC 1	HC 2	HC 3	HC 4	HC 5	HC 6	HC 7	HC 8	HC 9	HC 10							0.553	0.697	0.528	0.372	0.359	0.224	0.321	0.355	0.359	0.456								HC 1	HC 2	HC 3
2	4	4	3	0	0		0.262				0.435			7	4	3	3	5	4	5	4	5	5							0.448	0.646	0.587	0.422	0.524	0.148	0.418	0.528	0.532	0.245								5	6	6
NM 5							NM 3							NM 5																0.376	0.351	0.558		0.469	0.177	0.359	0.338	0.452	0.444								NM 5
HC 1	HC 2	HC 3	HC 4	HC 5	HC 6		HC 1	HC 2	HC 3	HC 4				HC 1	HC 2	HC 3	HC 4	HC 5	HC 6	HC 7	HC 8	HC 9	HC 10	HC 11	HC 12	HC 13	HC 14			0.308		0.346			0.27	0.194	0.211	0.237	0.427								HC 1	HC 2	HC 3
0	0	3	4	0	0		0.494	0.52	0.672	0.456				4	4	5	3	4	7	3	4	5	4	4	5	3	5								0.173	0.363			0.144								4	3	6
NM 6							0.397	0.486	0.608	0.469				NM 6																					0.131												NM 6
HC 1	HC 2	HC 3	HC 4	HC 5	HC 6		0.275	0.258	0.634					HC 1	HC 2	HC 3	HC 4	HC 5	HC 6	HC 7	HC 8	HC 9	HC 10	HC 11	HC 12					NM 3																	HC 1	HC 2	HC 3
1	4	4	4	2	0		0.317							4	4	4	4	5	3	4	4	4	6	6	5					HC 1	HC 2	HC 3	HC 4	HC 5	HC 6	HC 7	HC 8	HC 9	HC 10								4	7	3
NM 7							NM 4							NM 7																0.553	0.672	0.186	0.456	0.689	0.444	0.384	0.701	0	0								NM 7
HC 1	HC 2	HC 3	HC 4	HC 5	HC 6		HC 1	HC 2	HC 3	HC 4	HC 5	HC 6		HC 1	HC 2	HC 3	HC 4	HC 5	HC 6	HC 7	HC 8	HC 9	HC 10	HC 11	HC 12					0.338	0.401	0.173	0.262	0.579	0.384	0.368	0.634										HC 1	HC 2	HC 3
0	0	3	0	0	3		0.528	0.427	0.486	0.503	0	0		6	5	3	5	4	2	3	3	5	5	4	4					0.313	0.372	0.325	0.469	0.304	0.228	0.461	0.545										2	4	4
NM 8							0.38	0.351	0.461	0.52				NM 8																0.199	0.465				0.165	0.156											NM 8
HC 1	HC 2	HC 3	HC 4	HC 5	HC 6			0.435	0.283	0.401				HC 1	HC 2	HC 3	HC 4	HC 5	HC 6	HC 7	HC 8									0.258	0.389																HC 1	HC 2	HC 3
0	0	3	0	3	3			0.262	0.401					4	3	4	4	6	6	3	4									NM 4																	1	5	4
NM 9							NM 5							NM 9																HC 1	HC 2	HC 3	HC 4	HC 5	HC 6	HC 7	HC 8	HC 9	HC 10								NM 9
HC 1	HC 2	HC 3	HC 4				HC 1	HC 2	HC 3	HC 4	HC 5	HC 6		HC 1	HC 2	HC 3	HC 4	HC 5	HC 6	HC 7	HC 8	HC 9	HC 10	HC 11	HC 12					0.173	0.317	0.262	0.266	0.321	0.668	0.596	0.761	0.63	0.646								HC 1	HC 2	HC 3
4	3	3	3				0	0	0.376	0.562	0	0		5	4	4	4	3	4	5	4	5	5	4	4					0.376	0.296	0.38	0.308	0.296	0.406	0.651	0.566	0.6	0.427								4	3	3
NM 10									0.258	0.596				NM 10																0.351	0.308	0.638	0.363	0.507	0.553	0.672	0.266	0.342	0.63								NM 10
HC 1	HC 2	HC 3	HC 4						0.642	0.651				HC 1	HC 2	HC 3	HC 4	HC 5	HC 6	HC 7	HC 8	HC 9	HC 10							0.296	0.224			0.33	0.351	0.182	0.211	0.41	0.389								HC 1	HC 2	HC 3
4	2	3	3							0.308				4	5	4	4	4	3	4	2	4	4							0.68				0.414				0.477	0.397								6	4	7
NM 11							NM 6							NM 11																0.655																	NM 11
HC 1	HC 2	HC 3	HC 4	HC 5	HC 6		HC 1	HC 2	HC 3	HC 4	HC 5	HC 6		HC 1	HC 2	HC 3	HC 4	HC 5	HC 6	HC 7	HC 8	HC 9	HC 10							0.376																	HC 1	HC 2	HC 3
5	3	0	0	4	4		0.232	0.532	0.503	0.562	0.803	0		4	5	4	4	4	6	5	0	5	4							NM 5																	6	7	5
NM 12								0.752	0.393	0.541	0.537			NM 12																HC 1	HC 2	HC 3	HC 4	HC 5	HC 6	HC 7	HC 8	HC 9	HC 10	HC 11	HC 12	HC 13	HC 14				NM 12
HC 1	HC 2	HC 3	HC 4					0.744	0.558	0.57				HC 1	HC 2	HC 3	HC 4	HC 5	HC 6	HC 7	HC 8	HC 9	HC 10							0.406	0.355	0.27	0.384	0.321	0.301	0.541	0.359	0.494	0.477	0.279	0.562	0.524	0.139				HC 1	HC 2	HC 3
3	2	4	3					0.376	0.376	0.279				4	3	2	3	4	6	5	5	0	0							0.49	0.258	0.368	0.287	0.469	0.444	0.532	0.515	0.634	0.389	0.545	0.49	0.384	0.165				1	1	3
NM 13							NM 7							NM 13																0.469	0.414	0.308	0.422	0.528	0.336	0.549	0.397	0.52	0.6	0.38	0.494	0.363	0.11				NM 13
HC 1	HC 2	HC 3	HC 4	HC 5	HC 6		HC 1	HC 2	HC 3	HC 4	HC 5	HC 6		HC 1	HC 2	HC 3	HC 4	HC 5	HC 6	HC 7	HC 8	HC 9								0.363	0.258	0.27		0.241	0.238		0.342	0.617	0.566	0.452	0.148		0.085				HC 1	HC 2	HC 3
0	0	5	5	0	0		0	0	0.486	0	0	0.52		4	3	3	3	4	5	4	4	0										0.448			0.21			0.456					0.118				5	4	5
NM 14									0.646			0.249		NM 14																					0.298												NM 14
HC 1	HC 2	HC 3	HC 4	HC 5	HC 6				0.579			0.284		HC 1	HC 2	HC 3	HC 4	HC 5	HC 6	HC 7	HC 8	HC 9	HC 10							NM 6					0.322												HC 1	HC 2	HC 3
0	4	3	0	3	0		NM 8							4	4	4	4	3	4	3	4	2	0							HC 1	HC 2	HC 3	HC 4	HC 5	HC 6	HC 7	HC 8	HC 9	HC 10	HC 11	HC 12						5	3	4
NM 15							HC 1	HC 2	HC 3	HC 4	HC 5	HC 6		NM 15																0.211	0.63	0.384	0.41	0.507	0.562	0.38	0.562	0.211	0.642	0.499	0.49						NM 15
HC 1	HC 2	HC 3	HC 4	HC 5	HC 6		0	0	0.684	0	0.891	0.461		HC 1	HC 2	HC 3	HC 4	HC 5	HC 6	HC 7	HC 8	HC 9	HC 10	HC 11	HC 12					0.456	0.41	0.292	0.279	0.507	0.575	0.401	0.769	0.465	0.317	0.482	0.473						HC 1	HC 2	HC 3
2	3	0	1	0	0				0.68		0.465	0.435		5	4	5	6	5	5	4	4	5	4	4	4					0.422	0.334	0.283	0.389	0.621	0.473	0.431	0.211	0.532	0.448	0.566	0.414						3	6	2
NM 16									0.346		0.41	0.406		NM 16																0.228	0.465	0.144	0.355	0.334		0.194	0.152	0.106	0.3	0.701	0.452						NM 16
HC 1	HC 2	HC 3	HC 4	HC 5	HC 6		NM 9							HC 1	HC 2	HC 3	HC 4	HC 5	HC 6	HC 7	HC 8	HC 9	HC 10										0.19	0.503					0.139	0.537	0.422						HC 1	HC 2	HC 3
3	3	1	2	3	3		HC 1	HC 2	HC 3	HC 4				4	5	7	7	5	5	2	4	3	4																0.245	0.469							4	4	0
NM 17							0.579	0.422	0.549	0.27				NM 17																NM 7																	NM 17
HC 1	HC 2	HC 3	HC 4	HC 5	HC 6		0.634	0.308	0.524	0.296				HC 1	HC 2	HC 3	HC 4	HC 5	HC 6	HC 7	HC 8	HC 9	HC 10	HC 11	HC 12					HC 1	HC 2	HC 3	HC 4	HC 5	HC 6	HC 7	HC 8	HC 9	HC 10	HC 11	HC 12						HC 1	HC 2	HC 3
0	0	2	3	4	4		0.465	0.232	0.473	0.389				4	3	4	4	4	4	3	3	5	3	4	0					0.266	0.224	0.363	0.325	0.363	0.503	0.401	0.376	0.579	0.338	0.422	0.397						4	4	4
NM 18							0.346							NM 18																0.306	0.27	0.304	0.144	0.308	0.528	0.317	0.342	0.372	0.313	0.296	0.384						NM 18
HC 1	HC 2	HC 3	HC 4	HC 5	HC 6		NM 10							HC 1	HC 2	HC 3	HC 4	HC 5	HC 6	HC 7	HC 8	HC 9	HC 10							0.289	0.3	0.435	0.249	0.389		0.448	0.38	0.427	0.397	0.384	0.431						HC 1	HC 2	HC 3
2	2	4	4	4	5		HC 1	HC 2	HC 3	HC 4				4	2	4	4	3	4	5	5	0	4							0.366	0.33		0.33	0.41				0.258	0.482	0.321	0.389						2	4	5
NM 19							0.6	0.199	0.228	0.368				NM 19																0.422	0.27		0.321					0.3	0.524								NM 19
HC 1	HC 2	HC 3	HC 4				0.41	0.296	0.27	0.351				HC 1	HC 2	HC 3	HC 4	HC 5	HC 6	HC 7	HC 8	HC 9	HC 10							0.431																	HC 1	HC 2	HC 3
3	4	4	2				0.427		0.254	0.448				4	6	5	0	0	4	3	5	3	4							NM 8																	4	3	4
NM 20							0.245							NM 20																HC 1	HC 2	HC 3	HC 4	HC 5	HC 6	HC 7	HC 8										NM 20
HC 1	HC 2	HC 3	HC 4	HC 5	HC 6		NM 11							HC 1	HC 2	HC 3	HC 4	HC 5	HC 6	HC 7	HC 8	HC 9								0.33	0.279	0.6	0.418	0.515	0.325	0.604	0.477										HC 1	HC 2	HC 3
0	0	3	3	4	3		HC 1	HC 2	HC 3	HC 4	HC 5	HC 6		5	4	3	5	6	4	3	0	0								0.342	0.3	0.537	0.19	0.393	0.266	0.422	0.19										5	3	3
NM 21							0.422	0.486	0	0	0.321	0.338		NM 21																0.401	0.283	0.57	0.503	0.338	0.308	0.169	0.325										NM 21
HC 1	HC 2	HC 3	HC 4	HC 5	HC 6		0.41	0.587			0.477	0.351		HC 1	HC 2	HC 3	HC 4	HC 5	HC 6	HC 7	HC 8	HC 9	HC 10							0.444		0.499	0.655	0.659	0.313		0.33										HC 1	HC 2	HC 3
0	3	0	0	4	2		0.418	0.549			0.532	0.414		7	3	6	4	3	3	3	4	4	3											0.511	0.456												4	4	5
NM 22							0.401				0.524	0.228		NM 22																				0.338	0.194												NM 22
HC 1	HC 2	HC 3	HC 4	HC 5	HC 6		0.346							HC 1	HC 2	HC 3	HC 4	HC 5	HC 6	HC 7	HC 8	HC 9								NM 9																	HC 1	HC 2	HC 3
5	5	5	4	0	0		NM 12							5	5	4	4	4	5	6	6	4								HC 1	HC 2	HC 3	HC 4	HC 5	HC 6	HC 7	HC 8	HC 9	HC 10	HC 11	HC 12						5	5	4
NM 23							HC 1	HC 2	HC 3	HC 4				NM 23																0.579	0.308	0.266	0.389	0.418	0.393	0.254	0.494	0.169	0.199	0.617	0.372						NM 23
HC 1	HC 2	HC 3	HC 4	HC 5	HC 6		0.406	0.482	0.279	0.494				HC 1	HC 2	HC 3	HC 4	HC 5	HC 6	HC 7	HC 8	HC 9	HC 10							0.596	0.279	0.262	0.427	0.368	0.232	0.127	0.435	0.275	0.346	0.401	0.393						HC 1	HC 2	HC 3
4	3	4	2	0	0		0.634	0.452	0.27	0.532				3	4	2	4	4	6	3	5	5	3							0.292	0.308	0.469	0.27	0.363	0.262	0.22	0.384	0.363	0.194	0.22	0.308						4	4	4
NM 24							0.304		0.249	0.461				NM 24																0.118	0.427	0.414	0.499		0.389	0.165	0.524	0.342	0.49	0.207	0.266						NM 24
HC 1	HC 2	HC 3	HC 4	HC 5	HC 6				0.177					HC 1	HC 2	HC 3	HC 4	HC 5	HC 6	HC 7	HC 8	HC 9	HC 10	HC 11	HC 12					0.376						0.224		0.199	0.549								HC 1	HC 2	HC 3
0	0	4	4	0	0		NM 13							5	6	3	3	4	4	4	3	4	4	3	3					NM 10																	5	7	5
NM 25							HC 1	HC 2	HC 3	HC 4	HC 5	HC 6		NM 25																HC 1	HC 2	HC 3	HC 4	HC 5	HC 6	HC 7	HC 8	HC 9	HC 10								NM 25
HC 1	HC 2	HC 3	HC 4	HC 5	HC 6		0	0	0.663	0.431	0	0		HC 1	HC 2	HC 3	HC 4	HC 5	HC 6	HC 7	HC 8	HC 9	HC 10	HC 11	HC 12					0.372	0.368	0.482	0.372	0.359	0.228	0.604	0.41	0.308	0.245								HC 1	HC 2	HC 3
0	0	2	4	3	2				0.22	0.325				4	4	2	2	3	2	4	3	4	3	3	4					0.389	0.372	0.334	0.232	0.304	0.452	0.41	0.655	0.296	0.152								5	0	4
NM 26									0.532	0.304				NM 26																0.363	0.308	0.389	0.266	0.511	0.194	0.384		0.186	0.211								NM 26
HC 1	HC 2	HC 3	HC 4	HC 5	HC 6				0.262	0.161				HC 1	HC 2	HC 3	HC 4	HC 5	HC 6	HC 7	HC 8	HC 9	HC 10							0.325	0.304	0.182	0.372	0.406		0.118		0.338	0.148								HC 1	HC 2	HC 3
0	0	2	4	4	3				0.22	0.139				4	6	5	6	3	5	4	3	3	3								0.118																6	4	5
NM 27							NM 14							NM 27																NM 11																	NM 27
HC 1	HC 2	HC 3	HC 4	HC 5	HC 6		HC 1	HC 2	HC 3	HC 4	HC 5	HC 6		HC 1	HC 2	HC 3	HC 4	HC 5	HC 6	HC 7	HC 8	HC 9	HC 10							HC 1	HC 2	HC 3	HC 4	HC 5	HC 6	HC 7	HC 8	HC 9	HC 10								HC 1	HC 2	HC 3
0	0	5	4	4	5		0	0.528	0.351	0	0.351	0		3	5	3	3	5	1	4	3	3	3							0.642	0.135	0.482	0.435	0.532	0.389	0.477	0	0.646	0.41								3	3	4
NM 28								0.676	0.173		0.22			NM 28																0.376	0.186	0.444	0.182	0.625	0.3	0.511		0.465	0.368								NM 28
HC 1	HC 2	HC 3	HC 4	HC 5	HC 6			0.418	0.351		0.414			HC 1	HC 2	HC 3	HC 4	HC 5	HC 6	HC 7	HC 8	HC 9	HC 10							0.613	0.249	0.389	0.507	0.494	0.321	0.27		0.389	0.27								HC 1	HC 2	HC 3
0	0	2	3	4	2			0.152						4	3	3	4	3	4	4	5	2	4							0.431	0.097	0.363	0.359	0.41	0.232	0.156		0.444	0.38								3	4	2
							NM 15							NM 29																	0.194				0.127	0.182		0.228									NM 29
							HC 1	HC 2	HC 3	HC 4	HC 5	HC 6		HC 1	HC 2	HC 3	HC 4	HC 5	HC 6	HC 7	HC 8	HC 9	HC 10												0.325												HC 1	HC 2	HC 3
							0.363	0.482	0	0.951	0	0		3	4	3	4	4	4	4	4	5	4							NM 12																	3	3	4
							0.422	0.613						NM 30																HC 1	HC 2	HC 3	HC 4	HC 5	HC 6	HC 7	HC 8	HC 9	HC 10								NM 30
								0.393						HC 1	HC 2	HC 3	HC 4	HC 5	HC 6	HC 7	HC 8	HC 9	HC 10							0.511	0.524	0.524	0.355	0.541	0.241	0.351	0.342	0	0								HC 1	HC 2	HC 3
							NM 16							7	5	3	3	4	4	4	6	6	3							0.494	0.334	0.266	0.275	0.448	0.41	0.38	0.427										5	3	4
							HC 1	HC 2	HC 3	HC 4	HC 5	HC 6																		0.482	0.139		0.587	0.646	0.275	0.372	0.389
							0.427	0.363	0.33	0.342	0.655	0.249																		0.262				0.237	0.3	0.41	0.456
							0.241	0.228		0.215	0.452	0.363																							0.19	0.287	0.237
							0.296	0.439			0.482	0.384																							0.338
							NM 17																							NM 13
							HC 1	HC 2	HC 3	HC 4	HC 5	HC 6																		HC 1	HC 2	HC 3	HC 4	HC 5	HC 6	HC 7	HC 8	HC 9
							0	0	0.482	0.393	0.27	0.317																		0.249	0.241	0.562	0.482	0.532	0.461	0.241	0.625	0
									0.41	0.435	0.254	0.27																		0.304	0.583	0.427	0.38	0.499	0.211	0.173	0.701
										0.33	0.414	0.258																		0.292	0.511	0.604	0.346	0.397	0.254	0.215	0.245
											0.49	0.232																		0.334				0.131	0.232	0.249	0.22
							NM 18																												0.254
							HC 1	HC 2	HC 3	HC 4	HC 5	HC 6																		NM 14
							0.249	0.232	0.604	0.477	0.41	0.241																		HC 1	HC 2	HC 3	HC 4	HC 5	HC 6	HC 7	HC 8	HC 9	HC 10
							0.156	0.372	0.553	0.444	0.232	0.456																		0.477	0.19	0.507	0.325	0.321	0.52	0.604	0.486	0.38	0
									0.545	0.515	0.321	0.346																		0.566	0.215	0.389	0.444	0.469	0.528	0.444	0.486	0.49
									0.237	0.351	0.393	0.254																		0.596	0.283	0.553	0.397	0.684	0.427	0.397	0.389
												0.232																		0.203	0.308	0.139	0.287		0.38		0.27
							NM 19																							NM 15
							HC 1	HC 2	HC 3	HC 4																				HC 1	HC 2	HC 3	HC 4	HC 5	HC 6	HC 7	HC 8	HC 9	HC 10	HC 11	HC 12
							0.211	0.41	0.241	0.376																				0.254	0.575	0.317	0.465	0.283	0.19	0.49	0.38	0.334	0.524	0.49	0.482
							0.389	0.211	0.254	0.553																				0.296	0.397	0.296	0.507	0.499	0.304	0.182	0.313	0.296	0.541	0.41	0.3
							0.486	0.249	0.262																					0.368	0.203	0.334	0.262	0.3	0.334	0.418	0.232	0.287	0.368	0.127	0.211
								0.3	0.232																					0.355	0.27	0.359	0.334	0.237	0.313	0.397	0.194	0.266	0.363	0.342	0.338
							NM 20																							0.355		0.203	0.237	0.194	0.245			0.287
							HC 1	HC 2	HC 3	HC 4	HC 5	HC 6																					0.3
							0	0	0.389	0.418	0.317	0.532																		NM 16
									0.406	0.452	0.313	0.866																		HC 1	HC 2	HC 3	HC 4	HC 5	HC 6	HC 7	HC 8	HC 9	HC 10
									0.6	0.486	0.431	0.621																		0.38	0.287	0.321	0.228	0.308	0.452	0.524	0.448	0.308	0.317
											0.296																			0.545	0.203	0.287	0.127	0.254	0.406	0.435	0.532	0.127	0.469
							NM 21																							0.406	0.355	0.22	0.173	0.161	0.596		0.499	0.139	0.427
							HC 1	HC 2	HC 3	HC 4	HC 5	HC 6																		0.262	0.292	0.245	0.22	0.334	0.275		0.177		0.27
							0	0.448	0	0	0.401	0.275																			0.376	0.308	0.127	0.372	0.313
								0.452			0.494	0.448																				0.317	0.321
								0.304			0.587																					0.469	0.232
											0.625																			NM 17
							NM 22																							HC 1	HC 2	HC 3	HC 4	HC 5	HC 6	HC 7	HC 8	HC 9	HC 10	HC 11	HC 12
							HC 1	HC 2	HC 3	HC 4	HC 5	HC 6																		0.308	0.49	0.342	0.532	0.135	0.401	0.372	0.363	0.317	0.439	0.663	0
							0.279	0.494	0.655	0.359	0	0																		0.372	0.363	0.414	0.482	0.461	0.372	0.553	0.211	0.418	0.22	0.401
							0.266	0.444	0.338	0.41																				0.283	0.397	0.452	0.245	0.22	0.313	0.473	0.262	0.38	0.731	0.144
							0.19	0.739	0.524	0.372																				0.317		0.359	0.254	0.414	0.359			0.507		0.182
							0.646	0.511	0.57	0.372																												0.165
							0.368	0.486	0.254																					NM 18
							NM 23																							HC 1	HC 2	HC 3	HC 4	HC 5	HC 6	HC 7	HC 8	HC 9	HC 10
							HC 1	HC 2	HC 3	HC 4	HC 5	HC 6																		0.152	0.587	0.33	0.532	0.604	0.279	0.448	0.397	0	0.422
							0.292	0.735	0.363	0.245	0	0																		0.338	0.41	0.427	0.363	0.477	0.422	0.338	0.537		0.49
							0.486	0.317	0.575	0.224																				0.49		0.439	0.465	0.418	0.118	0.203	0.473		0.499
							0.486	0.448	0.566																					0.359		0.156	0.321		0.304	0.406	0.456		0.355
							0.583		0.469																											0.27	0.418
							NM 24																							NM 19
							HC 1	HC 2	HC 3	HC 4	HC 5	HC 6																		HC 1	HC 2	HC 3	HC 4	HC 5	HC 6	HC 7	HC 8	HC 9	HC 10
							0	0	0.562	0.642	0	0																		0.486	0.684	0.342	0	0	0.469	0.435	0.651	0.562	0.338
									0.68	0.477																				0.452	0.368	0.211			0.494	0.342	0.384	0.439	0.321
									0.313	0.245																				0.292	0.275	0.313			0.292	0.773	0.296	0.566	0.321
									0.33	0.422																				0.452	0.427	0.232			0.351		0.177		0.477
							NM 25																								0.511	0.194					0.351
							HC 1	HC 2	HC 3	HC 4	HC 5	HC 6																			0.6
							0	0	0.41	0.237	0.494	0.334																		NM 20
									0.558	0.279	0.566	0.287																		HC 1	HC 2	HC 3	HC 4	HC 5	HC 6	HC 7	HC 8	HC 9
										0.296	0.355																			0.355	0.439	0.287	0.262	0.275	0.389	0.482	0	0
										0.275																				0.38	0.249	0.237	0.346	0.304	0.465	0.321
							NM 26																							0.224	0.177	0.22	0.444	0.27	0.545	0.165
							HC 1	HC 2	HC 3	HC 4	HC 5	HC 6																		0.355	0.152		0.304	0.3	0.258
							0	0	0.549	0.461	0.406	0.469																		0.355			0.266	0.317
									0.363	0.714	0.338	0.237																						0.22
										0.545	0.313	0.237																		NM 21
										0.558	0.406																			HC 1	HC 2	HC 3	HC 4	HC 5	HC 6	HC 7	HC 8	HC 9	HC 10
							NM 27																							0.338	0.456	0.3	0.414	0.161	0.621	0.6	0.537	0.482	0.384
							HC 1	HC 2	HC 3	HC 4	HC 5	HC 6																		0.406	0.49	0.215	0.477	0.262	0.583	0.439	0.511	0.49	0.224
							0	0	0.421	0.4981	0.408	0.281																		0.22	0.418	0.266	0.477	0.499	0.507	0.583	0.596	0.427	0.249
									0.328	0.68	0.328	0.269																		0.313		0.148	0.613				0.199	0.321
									0.314	0.542	0.303	0.189																		0.165		0.194
									0.261	0.549	0.416	0.651																		0.444		0.169
									0.239			0.371																		0.224
							NM 28																							NM 22
							HC 1	HC 2	HC 3	HC 4	HC 5	HC 6																		HC 1	HC 2	HC 3	HC 4	HC 5	HC 6	HC 7	HC 8	HC 9
							0	0	0.308	0.604	0.469	0.448																		0.549	0.334	0.211	0.435	0.701	0.148	0.241	0.372	0.296
									0.27	0.444	0.325	0.782																		0.389	0.258	0.296	0.41	0.473	0.203	0.224	0.283	0.152
										0.689	0.469																			0.431	0.275	0.254	0.389	0.38	0.169	0.304	0.254	0.203
											0.672																			0.376	0.321	0.275	0.38	0.524	0.165	0.254	0.22	0.194
																														0.642	0.355				0.207	0.224	0.245
																																				0.237	0.249
																														NM 23
																														HC 1	HC 2	HC 3	HC 4	HC 5	HC 6	HC 7	HC 8	HC 9	HC 10
																														0.477	0.368	0.224	0.292	0.545	0.545	0.33	0.186	0.431	0.676
																														0.245	0.553	0.237	0.279	0.296	0.368	0.414	0.279	0.456	0.215
																														0.194	0.507		0.152	0.384	0.553	0.215	0.245	0.549	0.249
																															0.431		0.152	0.422	0.431		0.152	0.414
																																			0.401		0.106	0.566
																																			0.384
																														NM 24
																														HC 1	HC 2	HC 3	HC 4	HC 5	HC 6	HC 7	HC 8	HC 9	HC 10	HC 11	HC 12
																														0.355	0.173	0.524	0.515	0.215	0.566	0.313	0.604	0.469	0.177	0.304	0.317
																														0.342	0.406	0.575	0.6	0.372	0.545	0.342	0.604	0.342	0.144	0.351	0.346
																														0.397	0.503	0.465	0.558	0.41	0.646	0.469	0.456	0.422	0.296	0.355	0.359
																														0.177	0.422			0.486	0.541	0.477		0.427	0.359
																														0.173	0.283
																															0.203
																														NM 25
																														HC 1	HC 2	HC 3	HC 4	HC 5	HC 6	HC 7	HC 8	HC 9	HC 10	HC 11	HC 12
																														0.224	0.418	0.461	0.482	0.368	0.3	0.148	0.418	0.186	0.342	0.592	0.346
																														0.19	0.579	0.431	0.389	0.486	0.313	0.241	0.199	0.182	0.249	0.448	0.435
																														0.368	0.448			0.368		0.308	0.245	0.27	0.334	0.414	0.283
																														0.325	0.401					0.22		0.342			0.338
																														NM 26
																														HC 1	HC 2	HC 3	HC 4	HC 5	HC 6	HC 7	HC 8	HC 9	HC 10
																														0.232	0.422	0.393	0.558	0.511	0.469	0.254	0.393	0.321	0.558
																														0.456	0.503	0.41	0.507	0.448	0.503	0.266	0.27	0.232	0.376
																														0.355	0.473	0.338	0.49	0.414	0.52	0.215	0.266	0.317	0.372
																														0.325	0.482	0.376	0.57		0.448	0.228
																															0.532	0.334	0.325		0.52
																															0.473		0.503
																														NM 27
																														HC 1	HC 2	HC 3	HC 4	HC 5	HC 6	HC 7	HC 8	HC 9	HC 10
																														0.946	0.482	0.566	0.541	0.52	0.52	0.541	0.296	0.224	0.313
																														0.507	0.292	0.499	0.507	0.528		0.368	0.334	0.308	0.258
																														0.634	0.359	0.507	0.338	0.177		0.169	0.439	0.359	0.254
																															0.275			0.194		0.186
																															0.304			0.401
																														NM 28
																														HC 1	HC 2	HC 3	HC 4	HC 5	HC 6	HC 7	HC 8	HC 9	HC 10
																														0.22	0.33	0.41	0.376	0.477	0.266	0.334	0.477	0.389	0.342
																														0.279	0.346	0.465	0.279	0.422	0.275	0.368	0.448	0.41	0.414
																														0.19	0.3	0.461	0.363	0.245	0.241	0.359	0.486		0.38
																														0.279			0.6		0.22	0.338	0.186		0.304
																																					0.194
																														NM 29
																														HC 1	HC 2	HC 3	HC 4	HC 5	HC 6	HC 7	HC 8	HC 9	HC 10
																														0.38	0.494	0.566	0.439	0.258	0.266	0.203	0.266	0.237	0.173
																														0.477	0.427	0.532	0.439	0.237	0.359	0.237	0.207	0.287	0.186
																														0.287	0.482	0.368	0.439	0.334	0.363	0.262	0.215	0.346	0.19
																															0.613		0.469	0.33	0.33	0.351	0.186	0.258	0.254
																																						0.27
																														NM 30
																														HC 1	HC 2	HC 3	HC 4	HC 5	HC 6	HC 7	HC 8	HC 9	HC 10
																														0.241	0.152	0.431	0.41	0.266	0.486	0.321	0.456	0.249	0.532
																														0.266	0.249	0.38	0.287	0.439	0.431	0.397	0.372	0.292	0.465
																														0.224	0.3	0.562	0.456	0.325	0.401	0.258	0.262	0.207	0.461
																														0.224	0.283			0.334	0.477	0.397	0.401	0.165
																														0.292	0.283						0.393	0.19
																														0.215							0.452	0.194
																														0.3
[truncated: 21 more columns]

## Sheet: Rib num and area in Mut larvae
Ribeye punctae number									Ribeye punctae area											Ribeye punctae number															Ribeye punctae area														Ribeye punctae number
sema7a-/- mutant larvae 2 dpf									NM 1											sema7a-/- mutant larvae 3 dpf															NM 1														sema7a-/- mutant larvae 4 dpf
NM 1									HC 1	HC 2	HC 3	HC 4								NM 1															HC 1	HC 2	HC 3	HC 4	HC 5	HC 6	HC 7	HC 8							NM 1
HC 1	HC 2	HC 3	HC 4						0	0	0	0.372								HC 1	HC 2	HC 3	HC 4	HC 5	HC 6	HC 7	HC 8								0.215	0.211	0.161	0.254	0.266	0.494	0.262	0.258							HC 1
0	0	0	1						NM 2											5	3	5	2	3	4	4	5								0.165	0.338	0.169	0.461	0.262	0.355	0.114	0.245							4
NM 2									HC 1	HC 2	HC 3	HC 4	HC 5	HC 6						NM 2															0.169	0.422	0.359		0.165	0.258	0.165	0.393							NM 2
HC 1	HC 2	HC 3	HC 4	HC 5	HC 6				0.165	0	0.401	0	0	0						HC 1	HC 2	HC 3	HC 4	HC 5	HC 6	HC 7	HC 8								0.177		0.3			0.224	0.207	0.486							HC 1
3	0	3	0	0	0				0.258		0.532									5	3	2	4	4	5	4	2								0.114		0.228					0.363							4
NM 3									0.456		0.465									NM 3															NM 2														NM 3
HC 1	HC 2	HC 3	HC 4						NM 3											HC 1	HC 2	HC 3	HC 4	HC 5	HC 6	HC 7	HC 8	HC 9	HC 10						HC 1	HC 2	HC 3	HC 4	HC 5	HC 6	HC 7	HC 8							HC 1
1	2	1	1						HC 1	HC 2	HC 3	HC 4								3	3	4	4	4	2	1	4	3	4						0.3	0.266	0.363	0.173	0.19	0.123	0.186	0.127							2
NM 4									0.52	0.254	0.393	0.659								NM 4															0.156	0.296	0.334	0.245	0.237	0.287	0.148	0.182							NM 4
HC 1	HC 2	HC 3	HC 4							0.211										HC 1	HC 2	HC 3	HC 4	HC 5	HC 6	HC 7	HC 8	HC 9	HC 10						0.422	0.346		0.241	0.258	0.296	0.287								HC 1
3	3	2	3						NM 4											5	5	2	3	6	5	1	3	3	1						0.41			0.3	0.211	0.292	0.211								0
NM 5									HC 1	HC 2	HC 3	HC 4								NM 5															0.232					0.258									NM 5
HC 1	HC 2	HC 3	HC 4						0.499	0.444	0.325	0.296								HC 1	HC 2	HC 3	HC 4	HC 5	HC 6	HC 7	HC 8	HC 9	HC 10	HC 11					NM 3														HC 1
0	0	5	5						0.262	0.152	0.351	0.292								4	4	4	5	2	3	2	0	0	3	4					HC 1	HC 2	HC 3	HC 4	HC 5	HC 6	HC 7	HC 8	HC 9	HC 10					3
NM 6									0.406	0.334		0.203								NM 6															0.313	0.177	0.397	0.232	0.33	0.313	0.444	0.431	0.287	0.355					NM 6
HC 1	HC 2	HC 3	HC 4						NM 5											HC 1	HC 2	HC 3	HC 4	HC 5	HC 6	HC 7	HC 8	HC 9							0.325	0.211	0.406	0.182	0.224	0.313		0.27	0.317	0.144					HC 1
0	0	3	4						HC 1	HC 2	HC 3	HC 4								0	0	4	3	5	6	4	6	3							0.3	0.254	0.351	0.22	0.156	0.351		0.346	0.199	0.228					2
NM 7									0	0	0.215	0.194								NM 7																	0.401	0.296	0.283	0.334		0.444		0.152					NM 7
HC 1	HC 2	HC 3	HC 4								0.363	0.194								HC 1	HC 2	HC 3	HC 4	HC 5	HC 6	HC 7	HC 8								NM 4														HC 1
3	3	1	1								0.292	0.215								3	4	3	2	3	4	0	0								HC 1	HC 2	HC 3	HC 4	HC 5	HC 6	HC 7	HC 8	HC 9	HC 10					3
NM 8											0.304	0.177								NM 8															0.144	0.237	0.368	0.131	0.228	0.161	0.22	0.173	0.114	0.186					NM 8
HC 1	HC 2	HC 3	HC 4								0.232	0.287								HC 1	HC 2	HC 3	HC 4	HC 5	HC 6	HC 7	HC 8								0.334	0.211	0.3	0.258	0.182	0.224		0.161	0.093						HC 1
5	4	0	0						NM 6											3	4	2	3	4	4	0	0								0.325	0.389		0.334	0.169	0.135		0.177	0.118						0
NM 9									HC 1	HC 2	HC 3	HC 4								NM 9															0.228	0.304			0.249	0.258									NM 9
HC 1	HC 2	HC 3	HC 4						0	0	0.254	0.211								HC 1	HC 2	HC 3	HC 4	HC 5	HC 6	HC 7	HC 8	HC 9	HC 10						0.304	0.376			0.245	0.3									HC 1
0	4	0	0								0.444	0.279								5	2	0	0	2	4	4	4	3	3										0.245										2
NM 10											0.266	0.207								NM 10															NM 5														NM 10
HC 1	HC 2	HC 3	HC 4	HC 5								0.245								HC 1	HC 2	HC 3	HC 4	HC 5	HC 6	HC 7	HC 8	HC 9							HC 1	HC 2	HC 3	HC 4	HC 5	HC 6	HC 7	HC 8	HC 9	HC 10	HC 11				HC 1
5	0	0	0	0					NM 7											0	3	2	4	2	3	4	3	2							0.38	0.482	0.465	0.228	0.469	0.3	0.207	0	0	0.507	0.431				0
NM 11									HC 1	HC 2	HC 3	HC 4								NM 11															0.359	0.397	0.27	0.237	0.355	0.27	0.177			0.384	0.33				NM 11
HC 1	HC 2	HC 3	HC 4	HC 5	HC 6				0.659	0.465	0.228	0.296								HC 1	HC 2	HC 3	HC 4	HC 5	HC 6	HC 7	HC 8	HC 9	HC 10	HC 11					0.156	0.152	0.351	0.237		0.199				0.422	0.33				HC 1
3	0	2	0	0	4				0.693	0.541										0	2	5	3	3	3	3	4	1	3	4					0.313	0.258	0.169	0.19							0.477				2
NM 12									0.49	0.448										NM 12																		0.215											NM 12
HC 1	HC 2	HC 3	HC 4	HC 5	HC 6				NM 8											HC 1	HC 2	HC 3	HC 4	HC 5	HC 6	HC 7	HC 8								NM 6														HC 1
2	0	0	3	1	0				HC 1	HC 2	HC 3	HC 4								7	2	3	0	3	2	5	2								HC 1	HC 2	HC 3	HC 4	HC 5	HC 6	HC 7	HC 8	HC 9						3
NM 13									0.359	0.304	0	0								NM 13															0	0	0.275	0.473	0.152	0.237	0.486	0.203	0.346						NM 13
HC 1	HC 2	HC 3	HC 4	HC 5	HC 6				0.549	0.317										HC 1	HC 2	HC 3	HC 4	HC 5	HC 6	HC 7	HC 8										0.439	0.275	0.304	0.296	0.313	0.169	0.144						HC 1
2	2	0	0	2	1				0.177	0.199										3	2	4	4	5	4	5	4										0.3	0.169	0.38	0.194	0.279	0.118	0.123						4
NM14									0.245	0.207										NM 14																	0.482		0.334	0.139	0.279	0.287							NM 14
HC 1	HC 2	HC 3	HC 4						0.237											HC 1	HC 2	HC 3	HC 4	HC 5	HC 6	HC 7													0.351	0.182		0.139							HC 1
4	0	0	4						NM 9											4	0	3	4	3	3	5														0.161		0.127							0
NM 15									HC 1	HC 2	HC 3	HC 4								NM 15															NM 7														NM 15
HC 1	HC 2	HC 3	HC 4	HC 5	HC 6	HC 7	HC 8		0	0.232	0	0								HC 1	HC 2	HC 3	HC 4	HC 5	HC 6	HC 7	HC 8	HC 9							HC 1	HC 2	HC 3	HC 4	HC 5	HC 6	HC 7	HC 8							HC 1
3	3	0	0	1	0	0	3			0.19										2	3	0	3	2	4	2	4	2							0.372	0.127	0.279	0.211	0.292	0.38	0	0							3
NM 16										0.199										NM 16															0.317	0.448	0.262	0.148	0.308	0.342									NM 16
HC 1	HC 2	HC 3	HC 4	HC 5	HC 6	HC 7	HC 8			0.165										HC 1	HC 2	HC 3	HC 4	HC 5	HC 6	HC 7									0.368	0.304	0.317		0.418	0.384									HC 1
3	3	0	0	2	3	0	0		NM 10											4	3	4	4	5	0	2										0.634				0.389									4
NM 17									HC 1	HC 2	HC 3	HC 4	HC 5							NM 17															NM 8														NM 17
HC 1	HC 2	HC 3	HC 4	HC 5	HC 6				0.672	0	0	0	0							HC 1	HC 2	HC 3	HC 4	HC 5	HC 6	HC 7	HC 8	HC 9	HC 10						HC 1	HC 2	HC 3	HC 4	HC 5	HC 6	HC 7	HC 8							HC 1
2	2	1	0	1	0				0.49											3	4	3	5	4	3	0	0	2	3						0.363	0.317	0.249	0.224	0.279	0.342	0	0							4
NM 18									0.194											NM 18															0.494	0.359	0.161	0.334	0.152	0.292									NM 18
HC 1	HC 2	HC 3	HC 4	HC 5	HC 6	HC 7	HC 8		0.19											HC 1	HC 2	HC 3	HC 4	HC 5	HC 6	HC 7	HC 8								0.422	0.355		0.338	0.258	0.308									HC 1
0	0	4	3	1	1	0	3		0.283											4	3	0	0	3	4	4	3									0.41			0.169	0.106									2
NM 19									NM 11											NM 19															NM 9														NM 19
HC 1	HC 2	HC 3	HC 4						HC 1	HC 2	HC 3	HC 4	HC 5	HC 6						HC 1	HC 2	HC 3	HC 4	HC 5	HC 6	HC 7	HC 8								HC 1	HC 2	HC 3	HC 4	HC 5	HC 6	HC 7	HC 8	HC 9	HC 10					HC 1
1	0	2	4						0.372	0	0.161	0	0	0.38						0	4	0	4	3	3	5	0								0.346	0.435	0	0	0.199	0.338	0.338	0.262	0.363	0.38					3
NM 20									0.38		0.123			0.232						NM 20															0.422	0.499			0.262	0.397	0.342	0.287	0.384	0.317					NM 20
HC 1	HC 2	HC 3	HC 4	HC 5	HC 6				0.376					0.194						HC 1	HC 2	HC 3	HC 4	HC 5	HC 6	HC 7									0.397					0.173	0.406	0.439	0.376	0.19					HC 1
0	2	4	4	0	0									0.393						4	4	4	2	4	4	3									0.321					0.427	0.363	0.123							3
NM 21									NM 12											NM 21															0.177														NM 21
HC 1	HC 2	HC 3	HC 4	HC 5	HC 6	HC 7	HC 8		HC 1	HC 2	HC 3	HC 4	HC 5	HC 6						HC 1	HC 2	HC 3	HC 4	HC 5											NM 10														HC 1
4	3	2	3	3	0	0	0		0.553	0	0	0.368	0.287	0						4	3	6	4	4											HC 1	HC 2	HC 3	HC 4	HC 5	HC 6	HC 7	HC 8	HC 9						3
NM 22									0.528			0.372								NM 22															0	0.363	0.384	0.397	0.406	0.469	0.203	0.199	0.177						NM 22
HC 1	HC 2	HC 3	HC 4	HC 5	HC 6							0.507								HC 1	HC 2	HC 3	HC 4	HC 5	HC 6	HC 7	HC 8	HC 9	HC 10	HC 11						0.401	0.389	0.368	0.406	0.389	0.418	0.304	0.182						HC 1
1	2	0	4	0	0				NM 13											0	0	4	3	3	2	4	3	3	0	0						0.287		0.194		0.228	0.346	0.228							3
NM 23									HC 1	HC 2	HC 3	HC 4	HC 5	HC 6						NM 23																		0.334			0.355								NM 23
HC 1	HC 2	HC 3	HC 4	HC 5	HC 6				0.215	0.203	0	0	0.11	0.11						HC 1	HC 2	HC 3													NM 11														HC 1
4	3	2	2	0	0				0.203	0.19			0.148							3	3	3													HC 1	HC 2	HC 3	HC 4	HC 5	HC 6	HC 7	HC 8	HC 9	HC 10	HC 11				1
NM 24									NM14											NM 24															0	0.646	0.338	0.376	0.444	0.456	0.372	0.292	0.541	0.287	0.279				NM 24
HC 1	HC 2	HC 3	HC 4	HC 5	HC 6				HC 1	HC 2	HC 3	HC 4								HC 1	HC 2	HC 3	HC 4	HC 5												0.359	0.401	0.528	0.194	0.186	0.296	0.33		0.245	0.27				HC 1
2	0	3	2	0	0				0.215	0	0	0.245								3	3	3	3	0													0.325	0.414	0.499	0.427	0.359	0.655		0.207	0.372				4
NM 25									0.215			0.224								NM 25																	0.275					0.325			0.144
HC 1	HC 2	HC 3	HC 4	HC 5	HC 6				0.237			0.325								HC 1	HC 2	HC 3	HC 4														0.161
2	2	2	2	1	2				0.266			0.207								4	3	3	4												NM 12
NM 26									NM 15											NM 26															HC 1	HC 2	HC 3	HC 4	HC 5	HC 6	HC 7	HC 8
HC 1	HC 2	HC 3	HC 4	HC 5	HC 6				HC 1	HC 2	HC 3	HC 4	HC 5	HC 6	HC 7	HC 8				HC 1	HC 2	HC 3	HC 4	HC 5	HC 6	HC 7	HC 8	HC 9	HC 10						0.376	0.431	0.41	0	0.372	0.127	0.393	0.258
3	2	5	0	0	0				0.33	0.292	0	0	0.232	0	0	0.389				0	0	4	3	4	3	4	2	4	2						0.406	0.451	0.182		0.376	0.139	0.317	0.292
NM 27									0.33	0.296						0.368				NM 27															0.342		0.279		0.296		0.368
HC 1	HC 2	HC 3	HC 4						0.199	0.194						0.494				HC 1	HC 2	HC 3	HC 4												0.482						0.321
2	2	3	1						NM 16											3	5	5	5												0.469						0.461
NM 28									HC 1	HC 2	HC 3	HC 4	HC 5	HC 6	HC 7	HC 8																			0.199
HC 1	HC 2	HC 3	HC 4	HC 5	HC 6	HC 7	HC 8		0.313	0.406	0	0	0.41	0.3	0	0																			0.237
0	2	0	4	3	0	0	0		0.279	0.473			0.232	0.283																					NM 13
NM 29									0.152	0.346				0.351																					HC 1	HC 2	HC 3	HC 4	HC 5	HC 6	HC 7	HC 8
HC 1	HC 2	HC 3	HC 4	HC 5					NM 17																										0.237	0.254	0.287	0.245	0.444	0.465	0.473	0.427
3	2	0	0	0					HC 1	HC 2	HC 3	HC 4	HC 5	HC 6																					0.177	0.169	0.342	0.418	0.549	0.473	0.532	0.194
									0.596	0.389	0.3	0	0.169	0																					0.215		0.321	0.363	0.161	0.41	0.165	0.461
									0.258	0.211																											0.448	0.321	0.22	0.237	0.254	0.541
									NM 18																														0.296		0.33
									HC 1	HC 2	HC 3	HC 4	HC 5	HC 6	HC 7	HC 8																			NM 14
									0	0	0.376	0.342	0.338	0.135	0	0.262																			HC 1	HC 2	HC 3	HC 4	HC 5	HC 6	HC 7
											0.237	0.363				0.165																			0.279	0	0.338	0.338	0.33	0.308	0.199
											0.422	0.207				0.194																			0.279		0.308	0.152	0.287	0.232	0.363
											0.537																								0.275		0.296	0.3	0.266	0.321	0.22
									NM 19																										0.283			0.287			0.19
									HC 1	HC 2	HC 3	HC 4																							NM 15
									0.325	0	0.156	0.558																							HC 1	HC 2	HC 3	HC 4	HC 5	HC 6	HC 7	HC 8	HC 9
											0.173	0.638																							0.359	0.292	0	0.41	0.177	0.182	0.351	0.321	0.186
												0.334																							0.275	0.287		0.393	0.283	0.19	0.224	0.456	0.22
												0.296																								0.275		0.262		0.165		0.292
									NM 20																															0.279		0.313
									HC 1	HC 2	HC 3	HC 4	HC 5	HC 6																					NM 16
									0	0.292	0.249	0.397	0	0																					HC 1	HC 2	HC 3	HC 4	HC 5	HC 6	HC 7
										0.384	0.325	0.215																							0.346	0.262	0.308	0.38	0.123	0	0.207
											0.186	0.317																							0.3	0.287	0.304	0.173	0.22		0.313
											0.304	0.215																							0.249	0.296	0.325	0.279	0.148
									NM 21																										0.19		0.114	0.334	0.152
									HC 1	HC 2	HC 3	HC 4	HC 5	HC 6	HC 7	HC 8																							0.135
									0.342	0.351	0.355	0.287	0.456	0	0	0																			NM 17
									0.384	0.292	0.199	0.283	0.359																						HC 1	HC 2	HC 3	HC 4	HC 5	HC 6	HC 7	HC 8	HC 9	HC 10
									0.473	0.376		0.558	0.245																						0.27	0.389	0.245	0.275	0.313	0.3	0	0	0.3	0.431
									0.173																										0.287	0.266	0.452	0.241	0.194	0.215			0.275	0.334
									NM 22																										0.363	0.249	0.203	0.313	0.207	0.317				0.372
									HC 1	HC 2	HC 3	HC 4	HC 5	HC 6																						0.177		0.325	0.152
									0.177	0.194	0	0.477	0	0																								0.279
										0.161		0.359																							NM 18
												0.456																							HC 1	HC 2	HC 3	HC 4	HC 5	HC 6	HC 7	HC 8
												0.237																							0.279	0.663	0	0	0.296	0.275	0.241	0.444
									NM 23																										0.308	0.199			0.351	0.169	0.258	0.342
									HC 1	HC 2	HC 3	HC 4	HC 5	HC 6																					0.363	0.384			0.262	0.211	0.228	0.435
									0.262	0.182	0.346	0.275	0	0																					0.469					0.262	0.199
									0.275	0.334	0.461	0.275																							NM 19
									0.199	0.313																									HC 1	HC 2	HC 3	HC 4	HC 5	HC 6	HC 7	HC 8
									0.321																										0	0.241	0	0.194	0.283	0.393	0.194	0
									NM 24																											0.283		0.224	0.321	0.325	0.241
									HC 1	HC 2	HC 3	HC 4	HC 5	HC 6																						0.325		0.186	0.283	0.325	0.169
									0.241	0	0.368	0.194	0	0																						0.376		0.169			0.245
									0.127		0.469	0.207																													0.237
											0.359																								NM 20
									NM 25																										HC 1	HC 2	HC 3	HC 4	HC 5	HC 6	HC 7
									HC 1	HC 2	HC 3	HC 4	HC 5	HC 6																					0.33	0.283	0.186	0.275	0.287	0.389	0.393
									0.575	0.287	0.313	0.38	0.161	0.161																					0.625	0.317	0.511	0.304	0.338	0.342	0.465
									0.321	0.203	0.448	0.338		0.173																					0.325	0.372	0.528		0.41	0.406	0.397
									NM 26																										0.397	0.389	0.351		0.321	0.49
									HC 1	HC 2	HC 3	HC 4	HC 5	HC 6																					NM 21
									0.182	0.203	0.254	0	0	0																					HC 1	HC 2	HC 3	HC 4	HC 5
									0.203	0.215	0.211																								0.351	0.334	0.393	0.469	0.368
									0.156		0.241																								0.346	0.283	0.393	0.292	0.203
											0.232																								0.304	0.355	0.397	0.173	0.287
											0.127																								0.397		0.389		0.372
									NM 27																												0.334
									HC 1	HC 2	HC 3	HC 4																									0.338
									0.321	0.528	0.401	0.372																							NM 22
									0.351	0.558	0.41																								HC 1	HC 2	HC 3	HC 4	HC 5	HC 6	HC 7	HC 8	HC 9	HC 10	HC 11
											0.346																								0	0	0.346	0.41	0.22	0.346	0.439	0.304	0.207	0	0
									NM 28																												0.224	0.334	0.232	0.33	0.161	0.292	0.321
									HC 1	HC 2	HC 3	HC 4	HC 5	HC 6	HC 7	HC 8																					0.254	0.372	0.308		0.393	0.228	0.275
									0	0.203	0	0.232	0.431	0	0	0																					0.173				0.215
										0.186		0.313	0.376																						NM 23
												0.287	0.292																						HC 1	HC 2	HC 3
												0.279																							0.292	0.368	0.283
									NM 29																										0.317	0.296	0.287
									HC 1	HC 2	HC 3	HC 4	HC 5																						0.308	0.211	0.304
									0.448	0.283	0	0	0																						NM 24
									0.313	0.186																									HC 1	HC 2	HC 3	HC 4	HC 5
									0.321																										0.304	0.604	0.342	0.203	0
																																			0.389	0.38	0.359	0.19
																																			0.448	0.156	0.304	0.173
																																			NM 25
																																			HC 1	HC 2	HC 3	HC 4
																																			0.528	0.346	0.359	0.313
																																			0.494	0.346	0.325	0.41
																																			0.165	0.41	0.245	0.241
																																			0.287			0.431
																																			NM 26
																																			HC 1	HC 2	HC 3	HC 4	HC 5	HC 6	HC 7	HC 8	HC 9	HC 10
																																			0	0	0.296	0.224	0.11	0.469	0.203	0.19	0.397	0.245
																																					0.27	0.241	0.33	0.384	0.296	0.232	0.486	0.254
																																					0.245	0.414	0.566	0.199	0.211		0.127
																																					0.275		0.199		0.241		0.292
																																			NM 27
																																			HC 1	HC 2	HC 3	HC 4
																																			0.363	0.283	0.199	0.177
																																			0.275	0.279	0.177	0.106
																																			0.275	0.27	0.135	0.101
																																				0.384	0.101	0.106
																																				0.203	0.152	0.118
[truncated: 16 more columns]

## Sheet: MAGUK num and area in Con larv
MAGUK Punctae number									MAGUK Punctae area											MAGUK Punctae number															MAGUK Punctae area
Control larvae 2 dpf									NM 1											Control larvae 3 dpf															NM 1
NM 1									HC 1	HC 2	HC 3	HC 4	HC 5	HC 6						NM 1															HC 1	HC 2	HC 3	HC 4	HC 5	HC 6	HC 7	HC 8	HC 9	HC 10	HC 11	HC 12
HC 1	HC 2	HC 3	HC 4	HC 5	HC 6				0.292	0.292	0	0	0	0.321						HC 1	HC 2	HC 3	HC 4	HC 5	HC 6	HC 7	HC 8	HC 9	HC 10	HC 11	HC 12				0.341	0.315	0.349	0.363	0.354	0	0	0.373	0.362	0	0.392	0
2	1	0	0	0	2				0.215					0.266						1	2	2	2	1	0	0	1	1	0	2	0					0.358	0.304	0.317							0.315
NM 2									NM 2											NM 2															NM 2
HC 1	HC 2	HC 3	HC 4	HC 5	HC 6	HC 7	HC 8		HC 1	HC 2	HC 3	HC 4	HC 5	HC 6	HC 7	HC 8				HC 1	HC 2	HC 3	HC 4	HC 5	HC 6	HC 7	HC 8	HC 9	HC 10						HC 1	HC 2	HC 3	HC 4	HC 5	HC 6	HC 7	HC 8	HC 9	HC 10
2	2	2	3	0	0	0	0		0.361	0.384	0.431	0.401	0	0	0	0				0	1	1	0	1	2	1	1	1	0						0	0.338	0.368	0	0.331	0.38	0.346	0.249	0.334	0
NM 3									0.334	0.351	0.41	0.448								NM 3																				0.279
HC 1	HC 2	HC 3	HC 4	HC 5	HC 6						0.297									HC 1	HC 2	HC 3	HC 4	HC 5	HC 6	HC 7	HC 8								NM 3
1	1	3	0	1	0				NM 3											2	0	1	1	0	1	2	0								HC 1	HC 2	HC 3	HC 4	HC 5	HC 6	HC 7	HC 8
NM 4									HC 1	HC 2	HC 3	HC 4	HC 5	HC 6						NM 4															0.215	0	0.342	0.241	0	0.215	0.249	0.317
HC 1	HC 2	HC 3	HC 4	HC 5	HC 6				0.435	0.452	0.435	0	0.325	0						HC 1	HC 2	HC 3	HC 4	HC 5	HC 6	HC 7	HC 8	HC 9	HC 10	HC 11	HC 12				0.245						0.22	0.317
2	2	0	0	1	2						0.384									0	2	1	2	1	0	0	2	2	0	1	1				NM 4
NM 5											0.393									NM 5															HC 1	HC 2	HC 3	HC 4	HC 5	HC 6	HC 7	HC 8	HC 9	HC 10	HC 11	HC 12
HC 1	HC 2	HC 3	HC 4	HC 5	HC 6	HC 7	HC 8		NM 4											HC 1	HC 2	HC 3	HC 4	HC 5	HC 6	HC 7	HC 8								0	0.338	0.266	0.228	0.317	0	0	0.283	0.317	0	0.292	0.266
0	0	2	1	0	0	2	1		HC 1	HC 2	HC 3	HC 4	HC 5	HC 6						2	1	0	1	1	1	2	1									0.275		0.279				0.215	0.317
NM 6									0.435	0.19	0	0	0.27	0.241						NM 6															NM 5
HC 1	HC 2	HC 3	HC 4	HC 5	HC 6				0.363	0.203				0.245						HC 1	HC 2	HC 3	HC 4	HC 5	HC 6	HC 7	HC 8								HC 1	HC 2	HC 3	HC 4	HC 5	HC 6	HC 7	HC 8
2	1	0	1	0	0				NM 5											1	2	0	1	1	1	0	0								0.19	0.363	0	0.325	0.304	0.241	0.258	0.321
NM 7									HC 1	HC 2	HC 3	HC 4	HC 5	HC 6	HC 7	HC 8				NM 7															0.186						0.203
HC 1	HC 2	HC 3	HC 4	HC 5	HC 6				0	0	0.245	0.239	0	0	0.244	0.207				HC 1	HC 2	HC 3	HC 4	HC 5	HC 6	HC 7	HC 8	HC 9	HC 10						NM 6
1	1	1	1	2	0						0.177				0.207					0	0	2	1	2	1	0	1	1	0						HC 1	HC 2	HC 3	HC 4	HC 5	HC 6	HC 7	HC 8
NM 8									NM 6											NM 8															0.456	0.355	0	0.355	0.254	0.296	0	0
HC 1	HC 2	HC 3	HC 4	HC 5	HC 6				HC 1	HC 2	HC 3	HC 4	HC 5	HC 6						HC 1	HC 2	HC 3	HC 4	HC 5	HC 6	HC 7	HC 8	HC 9	HC 10							0.22
0	1	1	0	2	0				0.465	0.376	0	0.339	0	0						1	1	1	2	1	1	2	1	0	0						NM 7
NM 9									0.452											NM 9															HC 1	HC 2	HC 3	HC 4	HC 5	HC 6	HC 7	HC 8	HC 9	HC 10
HC 1	HC 2	HC 3	HC 4	HC 5	HC 6	HC 7	HC 8		NM 7											HC 1	HC 2	HC 3	HC 4	HC 5	HC 6	HC 7	HC 8	HC 9	HC 10	HC 11	HC 12				0	0	0.308	0.266	0.292	0.19	0	0.287	0.304	0
1	2	1	0	0	0	0	2		HC 1	HC 2	HC 3	HC 4	HC 5	HC 6						1	0	1	0	0	2	2	0	0	0	1	0						0.406		0.325
NM 10									0.351	0.3	0.262	0.362	0.313	0						NM 10															NM 8
HC 1	HC 2	HC 3	HC 4	HC 5	HC 6								0.334							HC 1	HC 2	HC 3	HC 4	HC 5	HC 6	HC 7	HC 8	HC 9	HC 10	HC 11	HC 12				HC 1	HC 2	HC 3	HC 4	HC 5	HC 6	HC 7	HC 8	HC 9	HC 10
0	1	1	0	2	1				NM 8											2	1	1	0	2	0	0	1	1	0	0	0				0.435	0.325	0.325	0.242	0.368	0.321	0.333	0.414	0	0
NM 11									HC 1	HC 2	HC 3	HC 4	HC 5	HC 6						NM 11																		0.268			0.341
HC 1	HC 2	HC 3	HC 4	HC 5	HC 6				0	0.245	0.301	0	0.397	0						HC 1	HC 2	HC 3	HC 4	HC 5	HC 6	HC 7	HC 8								NM 9
0	0	1	2	0	0								0.3							0	1	0	1	1	1	0	0								HC 1	HC 2	HC 3	HC 4	HC 5	HC 6	HC 7	HC 8	HC 9	HC 10	HC 11	HC 12
NM 12									NM 9											NM 12															0.338	0	0.346	0	0	0.254	0.372	0	0	0	0.266	0
HC 1	HC 2	HC 3	HC 4	HC 5	HC 6				HC 1	HC 2	HC 3	HC 4	HC 5	HC 6	HC 7	HC 8				HC 1	HC 2	HC 3	HC 4	HC 5	HC 6	HC 7	HC 8	HC 9	HC 10											0.452	0.215
0	2	1	1	1	0				0.313	0.414	0.307	0	0	0	0	0.469				1	0	2	2	2	1	0	0	0	0						NM 10
NM 13										0.389						0.304				NM 13															HC 1	HC 2	HC 3	HC 4	HC 5	HC 6	HC 7	HC 8	HC 9	HC 10	HC 11	HC 12
HC 1	HC 2	HC 3	HC 4	HC 5	HC 6				NM 10											HC 1	HC 2	HC 3	HC 4	HC 5	HC 6	HC 7	HC 8	HC 9							0.224	0.356	0.365	0	0.232	0	0	0.338	0.338	0	0	0
1	0	0	1	1	2				HC 1	HC 2	HC 3	HC 4	HC 5	HC 6						0	1	1	1	2	0	0	0	1							0.299				0.303
NM 14									0	0.317	0.342	0	0.241	0.355						NM 14															NM 11
HC 1	HC 2	HC 3	HC 4	HC 5	HC 6								0.279							HC 1	HC 2	HC 3	HC 4	HC 5	HC 6	HC 7	HC 8	HC 9							HC 1	HC 2	HC 3	HC 4	HC 5	HC 6	HC 7	HC 8
0	1	0	0	0	0				NM 11											1	3	0	0	0	2	1	1	1							0	0.389	0	0.304	0.3	0.303	0	0
NM 15									HC 1	HC 2	HC 3	HC 4	HC 5	HC 6						NM 15															NM 12
HC 1	HC 2	HC 3	HC 4	HC 5	HC 6				0	0	0.33	0.232	0	0						HC 1	HC 2	HC 3	HC 4	HC 5	HC 6	HC 7	HC 8	HC 9	HC 10	HC 11					HC 1	HC 2	HC 3	HC 4	HC 5	HC 6	HC 7	HC 8	HC 9	HC 10
2	0	1	2	0	0							0.282								2	0	1	1	1	0	0	0	1	0	0					0.362	0	0.275	0.283	0.279	0.207	0	0	0	0
NM 16									NM 12											NM 16																	0.228	0.351	0.254
HC 1	HC 2	HC 3	HC 4	HC 5	HC 6				HC 1	HC 2	HC 3	HC 4	HC 5	HC 6						HC 1	HC 2	HC 3	HC 4	HC 5	HC 6	HC 7	HC 8	HC 9							NM 13
1	1	2	0	1	0				0	0.376	0.321	0.304	0.351	0						0	1	0	1	0	0	2	0	1							HC 1	HC 2	HC 3	HC 4	HC 5	HC 6	HC 7	HC 8	HC 9
NM 17										0.365										NM 17															0	0.211	0.258	0.228	0.275	0	0	0	0.287
HC 1	HC 2	HC 3	HC 4						NM 13											HC 1	HC 2	HC 3	HC 4	HC 5	HC 6	HC 7	HC 8	HC 9	HC 10										0.313
0	1	2	0						HC 1	HC 2	HC 3	HC 4	HC 5	HC 6						0	0	0	0	0	1	1	1	1	0						NM 14
NM 18									0.38	0	0	0.22	0.215	0.331						NM 18															HC 1	HC 2	HC 3	HC 4	HC 5	HC 6	HC 7	HC 8	HC 9
HC 1	HC 2	HC 3	HC 4	HC 5	HC 6									0.287						HC 1	HC 2	HC 3	HC 4	HC 5	HC 6	HC 7	HC 8	HC 9	HC 10	HC 11	HC 12				0.245	0.292	0	0	0	0.265	0.3	0.203	0.299
1	2	1	1	0	1				NM 14											0	1	1	1	0	0	2	0	2	1	0	0					0.262				0.262
NM 19									HC 1	HC 2	HC 3	HC 4	HC 5	HC 6						NM 19																0.22
HC 1	HC 2	HC 3	HC 4	HC 5	HC 6				0	0.341	0	0	0	0						HC 1	HC 2	HC 3	HC 4	HC 5	HC 6	HC 7	HC 8	HC 9	HC 10						NM 15
2	3	1	0	1	2				NM 15											2	0	0	0	0	1	0	0	1	1						HC 1	HC 2	HC 3	HC 4	HC 5	HC 6	HC 7	HC 8	HC 9	HC 10	HC 11
NM 20									HC 1	HC 2	HC 3	HC 4	HC 5	HC 6						NM 20															0.262	0	0.22	0.279	0.228	0	0	0	0.279	0	0
HC 1	HC 2	HC 3	HC 4	HC 5	HC 6				0.249	0	0.287	0.351	0	0						HC 1	HC 2	HC 3	HC 4	HC 5	HC 6	HC 7	HC 8	HC 9	HC 10						0.249
2	1	0	1	0	2				0.258			0.283								0	0	0	0	1	1	1	1	0	1						NM 16
NM 21									NM 16											NM 21															HC 1	HC 2	HC 3	HC 4	HC 5	HC 6	HC 7	HC 8	HC 9
HC 1	HC 2	HC 3	HC 4	HC 5	HC 6	HC 7	HC 8		HC 1	HC 2	HC 3	HC 4	HC 5	HC 6						HC 1	HC 2	HC 3	HC 4	HC 5	HC 6	HC 7	HC 8								0	0.27	0	0.221	0	0	0.254	0	0.237
1	1	0	0	0	1	0	0		0.331	0.332	0.231	0	0.325	0						0	0	0	0	2	3	2	1														0.22
NM 22											0.261									NM 22															NM 17
HC 1	HC 2	HC 3	HC 4	HC 5	HC 6				NM 17											HC 1	HC 2	HC 3	HC 4	HC 5	HC 6	HC 7	HC 8	HC 9	HC 10						HC 1	HC 2	HC 3	HC 4	HC 5	HC 6	HC 7	HC 8	HC 9	HC 10
1	1	2	1	0	1				HC 1	HC 2	HC 3	HC 4								0	1	1	0	0	2	1	1	1	1						0	0	0	0	0	0.262	0.248	0.256	0.277	0
NM 23									0	0.372	0.279	0																							NM 18
HC 1	HC 2	HC 3	HC 4	HC 5	HC 6						0.245																								HC 1	HC 2	HC 3	HC 4	HC 5	HC 6	HC 7	HC 8	HC 9	HC 10	HC 11	HC 12
0	1	1	0	0	0				NM 18																										0	0.239	0.293	0.221	0	0	0.243	0	0.242	0.217	0	0
NM 24									HC 1	HC 2	HC 3	HC 4	HC 5	HC 6																											0.248		0.249
HC 1	HC 2	HC 3	HC 4	HC 5	HC 6				0.3	0.286	0.279	0.27	0	0.414																					NM 19
1	0	1	1	0	1					0.262																									HC 1	HC 2	HC 3	HC 4	HC 5	HC 6	HC 7	HC 8	HC 9	HC 10
									NM 19																										0.308	0	0	0	0	0.258	0	0	0.296	0.254
									HC 1	HC 2	HC 3	HC 4	HC 5	HC 6																					0.207
									0.3	0.27	0.287	0	0.237	0.266																					NM 20
									0.287	0.308				0.292																					HC 1	HC 2	HC 3	HC 4	HC 5	HC 6	HC 7	HC 8	HC 9	HC 10
										0.262																									0	0	0	0	0.308	0.245	0.266	0.215	0	0.296
									NM 20																										NM 21
									HC 1	HC 2	HC 3	HC 4	HC 5	HC 6																					HC 1	HC 2	HC 3	HC 4	HC 5	HC 6	HC 7	HC 8
									0.361	0.369	0	0.303	0	0.308																					0	0	0	0	0.294	0.346	0.304	0.232
									0.372					0.275																									0.283	0.279	0.266
									NM 21																															0.224
									HC 1	HC 2	HC 3	HC 4	HC 5	HC 6	HC 7	HC 8																			NM 22
									0.287	0.232	0	0	0	0.283	0	0																			HC 1	HC 2	HC 3	HC 4	HC 5	HC 6	HC 7	HC 8	HC 9	HC 10
									NM 22																										0	0.322	0.275	0	0	0.304	0.268	0.266	0.303	0.306
									HC 1	HC 2	HC 3	HC 4	HC 5	HC 6																										0.283
									0.33	0.336	0.315	0.358	0	0.377
											0.313
									NM 23
									HC 1	HC 2	HC 3	HC 4	HC 5	HC 6
									0	0.389	0.394	0	0	0
									NM 24
									HC 1	HC 2	HC 3	HC 4	HC 5	HC 6
									0.373	0	0.315	0.393	0	0.361

## Sheet: MAGUK num and area in Mut larv
MAGUK Punctae number										MAGUK Punctae area														MAGUK Punctae number													MAGUK Punctae area
sema7a-/- mutant larvae 2dpf										NM 1														sema7a-/- mutant larvae 3dpf													NM 1
NM 1										HC 1	HC 2	HC 3	HC 4	HC 5	HC 6									NM 1													HC 1	HC 2	HC 3	HC 4	HC 5	HC 6	HC 7	HC 8
HC 1	HC 2	HC 3	HC 4	HC 5	HC 6					0.254	0	0.203	0.249	0	0									HC 1	HC 2	HC 3	HC 4	HC 5	HC 6	HC 7	HC 8						0	0	0.169	0	0.19	0.169	0	0
1	0	1	1	0	0					NM 2														0	0	1	0	1	1	0	0						NM 2
NM 2										HC 1	HC 2	HC 3	HC 4	HC 5	HC 6									NM 2													HC 1	HC 2	HC 3	HC 4	HC 5	HC 6	HC 7	HC 8
HC 1	HC 2	HC 3	HC 4	HC 5	HC 6					0	0	0.173	0.148	0.224	0									HC 1	HC 2	HC 3	HC 4	HC 5	HC 6	HC 7	HC 8						0.165	0	0	0.199	0	0	0	0.283
0	0	1	1	1	0					NM 3														1	0	0	1	0	0	0	2													0.254
NM 3										HC 1	HC 2	HC 3	HC 4	HC 5	HC 6	HC 7	HC 8							NM 3													NM 3
HC 1	HC 2	HC 3	HC 4	HC 5	HC 6	HC 7	HC 8			0	0	0	0	0	0.215	0.228	0.19							HC 1	HC 2	HC 3	HC 4	HC 5	HC 6	HC 7	HC 8	HC 9					HC 1	HC 2	HC 3	HC 4	HC 5	HC 6	HC 7	HC 8	HC 9
0	0	0	0	0	1	1	1			NM 4														0	0	1	0	1	1	0	0	2					0	0	0.266	0	0.207	0.156	0	0	0.232
NM 4										HC 1	HC 2	HC 3	HC 4	HC 5	HC 6									NM 4																					0.224
HC 1	HC 2	HC 3	HC 4	HC 5	HC 6					0.148	0	0	0	0.131	0									HC 1	HC 2	HC 3	HC 4	HC 5	HC 6	HC 7	HC 8						NM 4
2	0	0	0	1	0					0.161														2	0	0	2	0	0	0	0						HC 1	HC 2	HC 3	HC 4	HC 5	HC 6	HC 7	HC 8
NM 5										NM 5														NM 5													0.217	0	0	0.227	0	0	0	0
HC 1	HC 2	HC 3	HC 4	HC 5	HC 6					HC 1	HC 2	HC 3	HC 4	HC 5	HC 6									HC 1	HC 2	HC 3	HC 4	HC 5	HC 6	HC 7	HC 8						0.172			0.207
1	2	0	0	0	0					0.135	0.208	0	0	0	0									0	0	1	0	2	0	0	0						NM 5
NM 6											0.161													NM 6													HC 1	HC 2	HC 3	HC 4	HC 5	HC 6	HC 7	HC 8
HC 1	HC 2	HC 3	HC 4	HC 5	HC 6					NM 6														HC 1	HC 2	HC 3	HC 4	HC 5	HC 6	HC 7	HC 8	HC 9					0	0	0.177	0	0.144	0	0	0
2	1	0	0	0	0					HC 1	HC 2	HC 3	HC 4	HC 5	HC 6									2	0	0	0	1	1	0	0	0									0.199
NM 7										0.266	0.203	0	0	0	0									NM 7													NM 6
HC 1	HC 2	HC 3	HC 4							0.202														HC 1	HC 2	HC 3	HC 4	HC 5	HC 6	HC 7							HC 1	HC 2	HC 3	HC 4	HC 5	HC 6	HC 7	HC 8	HC 9
0	0	0	0							NM 7														1	1	0	0	0	0	0							0.224	0	0	0	0.262	0.19	0	0	0
NM 8										HC 1	HC 2	HC 3	HC 4											NM 8													0.177
HC 1	HC 2	HC 3	HC 4							0	0	0	0											HC 1	HC 2	HC 3	HC 4	HC 5	HC 6	HC 7	HC 8						NM 7
2	1	1	0							NM 8														1	0	0	0	0	0	0	0						HC 1	HC 2	HC 3	HC 4	HC 5	HC 6	HC 7
NM 9										HC 1	HC 2	HC 3	HC 4											NM 9													0.225	0.208	0	0	0	0	0
HC 1	HC 2	HC 3	HC 4							0.249	0.161	0.135	0											HC 1	HC 2	HC 3	HC 4	HC 5	HC 6	HC 7							NM 8
1	0	0	0							0.19														0	0	1	0	0	0	1							HC 1	HC 2	HC 3	HC 4	HC 5	HC 6	HC 7	HC 8
NM 10										NM 9														NM 10													0.203	0	0	0	0	0	0	0
HC 1	HC 2	HC 3	HC 4							HC 1	HC 2	HC 3	HC 4											HC 1	HC 2	HC 3	HC 4	HC 5	HC 6	HC 7	HC 8						NM 9
1	0	0	0							0.334	0	0	0											1	0	0	0	0	0	0	1						HC 1	HC 2	HC 3	HC 4	HC 5	HC 6	HC 7
NM 11										NM 10														NM 11													0	0	0.237	0	0	0	0.245
HC 1	HC 2	HC 3	HC 4							HC 1	HC 2	HC 3	HC 4											HC 1	HC 2	HC 3	HC 4	HC 5	HC 6	HC 7	HC 8	HC 9					NM 10
0	0	0	0							0.228	0	0	0											2	0	0	0	0	0	0	0	0					HC 1	HC 2	HC 3	HC 4	HC 5	HC 6	HC 7	HC 8
NM 12										NM 11														NM 12													0.272	0	0	0	0	0	0	0.225
HC 1	HC 2	HC 3	HC 4	HC 5	HC 6					HC 1	HC 2	HC 3	HC 4											HC 1	HC 2	HC 3	HC 4	HC 5	HC 6	HC 7	HC 8	HC 9					NM 11
2	1	0	0	0	0					0	0	0	0											0	0	1	0	1	1	0	0	1					HC 1	HC 2	HC 3	HC 4	HC 5	HC 6	HC 7	HC 8	HC 9
NM 13										NM 12														NM 13													0.215	0	0	0	0	0	0	0	0
HC 1	HC 2	HC 3	HC 4	HC 5	HC 6					HC 1	HC 2	HC 3	HC 4	HC 5	HC 6									HC 1	HC 2	HC 3	HC 4	HC 5	HC 6	HC 7	HC 8						0.214
1	1	0	0	0	0					0.287	0.224	0	0	0	0									1	0	0	0	1	0	0	1						NM 12
NM 14										0.297														NM 14													HC 1	HC 2	HC 3	HC 4	HC 5	HC 6	HC 7	HC 8	HC 9
HC 1	HC 2	HC 3	HC 4	HC 5	HC 6					NM 13														HC 1	HC 2	HC 3	HC 4	HC 5	HC 6	HC 7	HC 8	HC 9					0	0	0.215	0	0.218	0.213	0	0	0.258
2	0	0	0	0	0					HC 1	HC 2	HC 3	HC 4	HC 5	HC 6									2	1	0	0	0	0	1	0	0					NM 13
NM 15										0.152	0.177	0	0	0	0									NM 15													HC 1	HC 2	HC 3	HC 4	HC 5	HC 6	HC 7	HC 8
HC 1	HC 2	HC 3	HC 4	HC 5						NM 14														HC 1	HC 2	HC 3	HC 4	HC 5	HC 6	HC 7	HC 8						0.206	0	0	0	0.266	0	0	0.292
1	2	0	0	0						HC 1	HC 2	HC 3	HC 4	HC 5	HC 6									1	1	0	0	0	1	0	2						NM 14
NM 16										0.241	0	0	0	0	0									NM 16													HC 1	HC 2	HC 3	HC 4	HC 5	HC 6	HC 7	HC 8	HC 9
HC 1	HC 2	HC 3	HC 4							0.249														HC 1	HC 2	HC 3	HC 4	HC 5	HC 6	HC 7	HC 8	HC 9					0.215	0.194	0	0	0	0	0.22	0	0
1	1	0	0							NM 15														2	0	0	0	1	0	0	0	1					0.232
NM 17										HC 1	HC 2	HC 3	HC 4	HC 5										NM 17													NM 15
HC 1	HC 2	HC 3	HC 4	HC 5	HC 6					0.321	0.259	0	0	0										HC 1	HC 2	HC 3	HC 4	HC 5	HC 6	HC 7	HC 8	HC 9					HC 1	HC 2	HC 3	HC 4	HC 5	HC 6	HC 7	HC 8
1	0	0	0	0	0						0.187													0	0	0	1	0	1	0	0	0					0.224	0.22	0	0	0	0.262	0	0.255
NM 18										NM 16																																		0.232
HC 1	HC 2	HC 3	HC 4	HC 5	HC 6					HC 1	HC 2	HC 3	HC 4																								NM 16
2	1	0	0	0	0					0.207	0.194	0	0																								HC 1	HC 2	HC 3	HC 4	HC 5	HC 6	HC 7	HC 8	HC 9
										NM 17																											0.19	0	0	0	0.213	0	0	0	0.228
										HC 1	HC 2	HC 3	HC 4	HC 5	HC 6																						0.28
										0.292	0	0	0	0	0																						NM 17
										NM 18																											HC 1	HC 2	HC 3	HC 4	HC 5	HC 6	HC 7	HC 8	HC 9
										HC 1	HC 2	HC 3	HC 4	HC 5	HC 6																						0	0	0	0.266	0	0.234	0	0	0
										0.262	0.3	0	0	0	0
										0.139
