# Supplementary figures and images for: Semaphorin7A patterns neural circuitry in the lateral line of the zebrafish
Source: eLife journal article supplement (doi:10.7554/elife.89926), 2023-09-12

# The full raw unedited gel

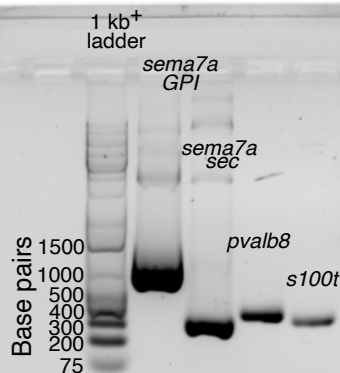

# Cropped gel image

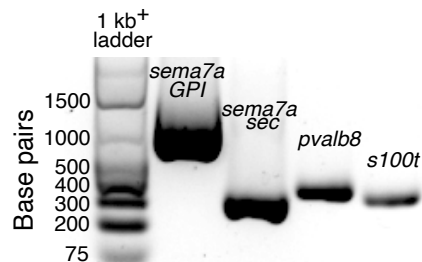

Supplement: fig1-data1 [file elife-89926-fig1-data1-v1.zip]
